# Supplementary material for: Changes in the spectrum of kidney diseases: a 14-year single-center retrospective renal biopsy study from southeast China
Source: PeerJ. 2025 Apr 14;13:e19302. doi: 10.7717/peerj.19302 (PMC12005175; doi:10.7717/peerj.19302)
Supplement: Supplemental Information 3 — All analyzed pathology results and clinical data. [file peerj-13-19302-s003.xlsx]

## Sheet: Sheet1
Names	Sex	Age	Date of biopsy	Pathological diagnosis	Serum albumin（g/L)	Serum creatinine（μmol/L）	eGFR（ml/min)	Urinary occult blood（个/uL）	Urinary protein（g/L)	Urinary erythrocyte（个/HP）	24-hour proteinuria（g）	SBP（mmHg）	DBP（mmHg)	Duration of hypertension	Duration of diabetes	Combined with malignant tumor or not	AKI or not	CKD or not	NS or not
1	F	56	2023-06-29 11:09:03	Renal Amyloidosis	27.7	50	104.23	-	3.0（3+）	3.46	2.02	121	74	0	0	1	0	0	0
2	F	60	2023-06-29 11:07:58	MCD	19.8	64	90.7	50（2+）	10（4+）	6.46	5.01	159	86	First found	0	0	0	0	1
3	F	32	2023-06-29 11:06:17	DN	36.5	55	119.56	50（2+）	1.0（2+）	6.19	3.05	132	107	First found	First found	0	0	0	0
4	M	73	2023-06-29 11:04:57	MN	25.4	82	81.41	20（1+）	10（4+）	6.23	4.33	141	88	The course of disease is unknown	0	0	0	0	1
5	F	22	2023-06-26 10:15:40	IgA	42.1	58	129.04	250（3+）	-	5.9	0.2	135	88	0	0	0	0	0	0
6	F	17	2023-06-26 10:15:28	LN	24.7	116	63.6207	250（3+）	3.0（3+）	37.39	8.06	125	71	0	0	0	0	0	1
7	F	25	2023-06-19 10:51:59	MCD	19.9	56	63.6522	-	10（4+）	0.31	6.21	96	60	0	0	0	0	Ⅰ	1
8	M	73	2023-06-19 10:51:13	MN	30.4	87	120	10（+-）	3.0（3+）	3.38	5.03	167	71	10 years	0	0	0	Ⅱ	0
9	M	44	2023-06-19 10:48:24	DN	33	773	81.0989	10（+-）	10（4+）	3.76	8.09	154	85	3 years	10 years	0	0	Ⅴ	0
10	F	23	2023-06-15 10:38:46	LN	34.2	135	108.696	10（+-）	1.0（2+）	1.31	3.05	112	88	The course of disease is unknown	0	0	0	Ⅰ	0
11	M	68	2023-06-15 10:38:35	MPGN	28	150	177.143	10（+-）	10（4+）	3.64	5.45	178	103	5 years	0	0	0	Ⅲ	1
12	F	56	2023-06-15 10:38:25	ANCA-associated glomerulonephritis	26.3	490	104.789	20（1+）	1.0（2+）	4.21	3.05	117	65	1 month	0	0	0	Ⅴ	0
13	F	81	2023-06-15 10:38:14	MN	40.3	116	110.909	20（1+）	0.3（1+）	2.45	1.01	137	79	10 years	0	0	0	Ⅲ	0
14	F	27	2023-06-15 10:01:14	LN	36.2	61	122	-	1.0（2+）	2.75	0.55	106	70	0	0	0	0	0	0
15	F	79	2023-06-12 11:01:59	MCD	16.7	97	61.9835	10（+-）	10（4+）	4.05	16.27	125	88	0	0	0	0	Ⅰ	1
16	F	31	2023-06-12 11:01:00	MN	31.5	49	133.929	50（2+）	10（4+）	8.42	1.69	131	75	0	0	0	0	0	1
17	M	65	2023-06-12 10:59:28	MN	19.4	83	108	50（2+）	10（4+）	28.49	10.02	127	75	0	0	0	0	0	1
18	F	72	2023-06-08 10:35:09	DN	40.3	89	120.968	-	0.3（1+）	1.04	0.69	154	68	5 years	10 years	0	0	Ⅲ	0
19	M	38	2023-06-08 10:33:41	IgA	37.5	256	63.5593	250（3+）	1.0（2+）	12.69	1.01	108	71	First found	0	0	0	Ⅳ	0
20	M	61	2023-06-08 10:20:18	LN	34.7	58	174.286	50（2+）	1.0（2+）	32.38	0.97	121	77	10 years	0	0	0	0	0
21	F	36	2023-06-08 10:19:15	LN	30.5	162	104.789	50（2+）	1.0（2+）	37.58	2.38	156	113	0	0	0	0	Ⅲ	0
22	M	25	2023-06-06 09:27:39	LN	24.9	79	119.048	250（3+）	3.0（3+）	184.03	6.51	164	106	First found	0	0	0	0	1
23	F	73	2023-06-06 09:27:19	MN	25.7	68	62	50（2+）	10（4+）	3.89	7.39	159	78	10 years	0	0	0	0	1
24	M	57	2023-06-06 09:27:00	MN	37.8	174	60	-	1.0（2+）	1.03	4.77	158	89	7 years	0	0	0	Ⅲ	1
25	M	55	2023-06-06 09:26:41	MN	31.1	78	153.75	250（3+）	3.0（3+）	26.08	3.94	148	91	1 month	2 weeks	0	0	0	1
26	M	74	2023-06-06 09:25:09	MN	28.7	73	140.26	50（2+）	10（4+）	44.5	7.09	131	76	3 years	12 years	0	0	0	1
27	M	25	2023-06-06 09:24:52	IgA	42.7	93	145.817	250（3+）	0.3（1+）	9.25	0.35	116	85	0	0	0	0	Ⅰ	0
28	M	52	2023-06-05 15:51:13	DN	48.6	133	76.0041	-	3.0（3+）	0.23	3.05	122	82	17 years	17 years	1	0	0	0
29	F	29	2023-06-05 11:51:47	MN	24.8	50	121.192	50（2+）	10（4+）	162.63	4.89	121	88	0	0	0	0	0	1
30	F	47	2023-06-05 11:50:51	IgA	46.3	178	150.612	250（3+）	1.0（2+）	9.04	1.35	130	86	2 years	0	0	0	Ⅲ	0
31	M	53	2023-06-05 11:49:51	DN	35.1	277	106.861	10（+-）	3.0（3+）	2.47	3.56	138	88	The course of disease is unknown	The course of disease is unknown	0	1	0	0
32	F	58	2023-06-05 11:49:03	ANCA-associated glomerulonephritis	33.8	591	76.25	250（3+）	1.0（2+）	717.59	0.56	165	85	First found	0	0	0	Ⅴ	0
33	M	54	2023-06-05 11:48:04	MN	35.4	66	77.2152	20（1+）	10（4+）	1.15	2.92	118	80	10 years	0	0	0	0	1
34	M	52	2023-06-05 11:47:05	MN	22.4	88	57.1861	50（2+）	3.0（3+）	17.39	3.52	133	89	First found	0	0	0	Ⅱ	1
35	M	67	2023-06-05 11:46:05	MCD	18.1	201	76.8595	250（3+）	10（4+）	93.55	14.23	127	87	0	0	0	1	0	1
36	M	50	2023-06-05 11:43:40	MPGN	15.2	83	143.58	20（1+）	0.3（1+）	4.86	0.52	116	73	0	0	0	0	0	1
37	F	25	2023-06-01 09:20:18	LN	26	68	81.53	50（2+）	3.0（3+）	12.01	3.05	125	80	0	0	0	0	0	0
38	F	33	2023-05-29 10:36:02	IgA	38.7	53	149.696	250（3+）	0.3（1+）	51.84	0.39	108	63	0	0	0	0	0	0
39	F	68	2023-05-29 10:35:49	Crescentic glomerulonephritis	39.6	189	7.42515	250（3+）	1.0（2+）	1164.89	1.64	124	61	0	0	0	1	0	0
40	F	70	2023-05-25 10:51:40	ANCA-associated glomerulonephritis	30.4	308	81.53	250（3+）	0.3（1+）	12.19	3.05	126	74	0	0	0	0	Ⅳ	0
41	M	50	2023-05-25 10:51:27	DN	29.8	164	114.545	50（2+）	3.0（3+）	4.86	10.22	136	67	2 months	20 years	0	0	Ⅲ	1
42	M	79	2023-05-25 10:51:13	MCD	20.2	77	81.53	20（1+）	10（4+）	4.79	10.36	164	84	0	0	0	0	Ⅱ	1
43	M	46	2023-05-25 10:51:01	LN	26.7	115	182.353	250（3+）	3.0（3+）	3.15	1.54	145	98	0	0	0	0	Ⅱ	0
44	M	36	2023-05-25 09:53:41	LN	25.4	100	47.9058	250（3+）	1.0（2+）	1.58	4.08	124	76	0	0	0	0	0	1
45	F	56	2023-05-22 10:41:01	MN	43.4	59	104.202	20（1+）	1.0（2+）	0.72	0.39	101	64	0	0	0	0	Ⅰ	0
46	M	53	2023-05-22 10:40:50	IgA	43.8	102	51.1765	50（2+）	0.3（1+）	4.5	0.76	153	97	0	0	0	0	0	0
47	M	70	2023-05-22 10:40:39	MN	27.9	100	42.7338	50（2+）	3.0（3+）	5.78	2.79	114	79	0	0	0	1	0	1
48	F	36	2023-05-18 11:51:06	LN	35.4	59	55.6701	250（3+）	1.0（2+）	29.18	0.81	96	76	0	0	0	0	0	0
49	F	30	2023-05-18 11:50:53	LN	26.8	96	99.7059	250（3+）	1.0（2+）	24.39	3.6	102	63	0	0	1	0	Ⅱ	1
50	F	41	2023-05-18 10:44:03	IgA	37.9	139	49.3333	20（1+）	3.0（3+）	2.86	2.72	123	84	0	0	0	0	Ⅲ	0
51	M	66	2023-05-18 10:43:49	MN	36.4	102	89.6296	20（1+）	1.0（2+）	6.21	2.77	117	84	9 years	0	0	0	Ⅰ	0
52	F	34	2023-05-18 10:42:45	IgA	47.6	62	102.581	250（3+）	0.3（1+）	170.19	0.3	115	85	0	0	0	0	0	0
53	F	44	2023-05-15 11:20:57	IgA	32.4	73	78.9041	-	1.0（2+）	0.43	1.73	114	80	0	0	0	0	Ⅰ	0
54	F	36	2023-05-15 11:20:43	LN	24.4	49	139.565	-	0.3（1+）	0.29	1.9	107	85	0	0	0	0	0	0
55	F	51	2023-05-15 11:20:28	IgA	42.2	82	116.727	50（2+）	0.15（+-）	11.41	0.1	113	73	0	0	0	0	Ⅲ	0
56	M	40	2023-05-15 11:20:16	IgA	36.7	164	36.5854	50（2+）	3.0（3+）	8.6	3.87	137	93	0	0	0	0	Ⅲ	0
57	F	42	2023-05-15 11:20:05	IgA	36.6	78	185.366	250（3+）	1.0（2+）	5.58	0.74	113	60	0	0	0	0	0	0
58	F	45	2023-05-11 11:23:52	MN	25.5	61	93.4426	50（2+）	10（4+）	30.62	3.05	116	75	0	0	0	0	Ⅰ	1
59	F	70	2023-05-11 11:23:37	IgA	20.4	67	62.6866	10（+-）	3.0（3+）	0.63	6.17	100	60	2 years	0	0	0	Ⅱ	1
60	F	23	2023-05-11 11:22:56	LN	17.1	100	70.2	250（3+）	3.0（3+）	278.59	6.42	123	85	0	0	0	1	0	1
61	M	36	2023-05-11 11:22:38	MCD	43.8	280	22.2857	20（1+）	-	0.31	3.05	126	89	0	0	0	1	0	0
62	M	47	2023-05-11 11:22:25	IgA	37.5	103	54.1748	50（2+）	0.3（1+）	12.2	0.68	141	98	0	0	0	0	Ⅱ	0
63	F	54	2023-05-08 15:19:12	Renal lesion associated with malignant tumor	25.1	52	87.0283	50（2+）	1.0（2+）	17.68	1.4	143	92	0	0	0	0	0	0
64	M	63	2023-05-08 12:29:12	LN	25.1	297	157.759	250（3+）	3.0（3+）	6.19	7.4	131	84	First found	0	0	0	Ⅳ	1
65	F	38	2023-05-08 12:28:58	LN	24.6	216	25.0167	250（3+）	1.0（2+）	57.06	12.72	187	116	1 year	0	0	0	Ⅳ	1
66	F	42	2023-05-08 12:02:52	LN	30.2	66	46.5804	50（2+）	3.0（3+）	8.33	3.44	148	89	10 days	0	0	0	0	1
67	F	38	2023-05-08 12:02:37	MN	30.5	64	77.5385	10（+-）	0.3(1+)	4.81	1.01	117	79	0	0	0	0	0	0
68	F	36	2023-05-08 12:02:24	IgA	40.3	54	81.53	50(2+)	3.0(3+)	7.51	1.18	125	90	5 years	0	0	0	0	0
69	F	31	2023-05-08 12:02:09	MCD	34.8	84	22.6009	-	1.0(2+)	2.25	1	159	87	First found	0	0	0	Ⅱ	0
70	F	63	2023-05-08 12:01:57	MCD	27.3	42	45.8065	50(2+)	1.0(2+)	3.49	3.26	129	78	0	0	0	0	Ⅰ	1
71	F	34	2023-05-08 12:00:13	MN	22.5	57	38.9121	50(2+)	10(4+)	20.92	4.15	96	66	0	0	0	0	0	1
72	M	73	2023-05-04 11:59:58	MN	22.9	93	100.806	250(3+)	10(4+)	8.73	3.05	121	84	10 years	10 years	0	0	Ⅱ	1
73	F	79	2023-05-04 10:42:34	ANCA-associated glomerulonephritis	28.7	221	140.038	250(3+)	1.0(2+)	122.29	1.19	122	68	0	0	0	0	Ⅳ	0
74	F	41	2023-05-04 10:42:02	MN	28.3	64	175.714	20(1+)	1.0(2+)	8.96	2.1	131	82	0	0	0	0	Ⅰ	1
75	M	29	2023-04-27 11:52:47	Hypertensive Renal Disease	51.9	152	36	-	0.3(1+)	0.2	2.7	129	103	1 month	0	0	0	Ⅲ	0
76	M	59	2023-04-27 11:52:39	MCD	42.8	99	39.7959	50(2+)	0.3(1+)	20.32	2.6	132	90	3 months	0	0	0	0	1
77	M	63	2023-04-27 11:52:32	IgA	39.9	142	29.1509	50(2+)	0.3(1+)	10	2.66	141	86	10 years	0	0	0	Ⅲ	0
78	M	44	2023-04-27 11:52:24	IgA	39.9	111	42.5806	20(1+)	0.3(1+)	12.92	2.67	140	83	3 years	0	0	0	Ⅱ	0
79	F	18	2023-04-27 11:52:17	LN	24.5	115	40.3846	20(1+)	1.0(2+)	7.94	1.7	118	82	0	0	0	0	0	1
80	M	47	2023-04-27 11:52:08	IgA	43.9	120	102.857	20(1+)	0.15(+-)	9.34	1.96	128	75	10 months	0	0	0	Ⅱ	0
81	F	36	2023-04-27 11:51:58	LN	28.1	46	55.5046	20(1+)	3.0(3+)	8.77	1.66	101	74	0	0	0	0	0	0
82	M	54	2023-04-27 11:51:49	MsPGN	43.8	129	81.53	50(2+)	0.3(1+)	20.05	1	118	89	6 years	0	0	0	0	0
83	M	54	2023-04-27 09:25:44	ANCA-associated glomerulonephritis	40.8	309	43.4579	50(2+)	0.15(+-)	8.14	3.7	106	68	0	0	0	0	0	0
84	M	46	2023-04-24 10:29:34	MsPGN	31.9	190	60.8372	250(3+)	3.0(3+)	23.11	2.75	116	65	0	0	0	0	0	0
85	F	32	2023-04-20 10:26:04	MCD	22.7	44	101.818	20(1+)	10(4+)	6.89	2.97	121	66	0	0	0	0	0	1
86	M	56	2023-04-20 10:25:52	DN	27.8	129	89.7479	-	10(4+)	17.48	1.6	135	66	1 year	1 year	0	0	Ⅲ	1
87	F	50	2023-04-20 09:24:44	LN	34.6	97	55.6701	-	1.0(2+)	0.11	1.6	127	82	0	0	0	0	0	0
88	F	38	2023-04-18 16:07:18	FSGS	40.4	123	55.4745	20(1+)	1.0(2+)	2.74	2.8	167	99	0	0	0	0	Ⅲ	1
89	M	51	2023-04-18 15:09:22	MCD	41.2	115	59.1362	250(3+)	1.0(2+)	25.06	3.05	122	76	0	0	0	0	0	0
90	M	38	2023-04-17 11:24:11	IgA	40.7	133	150	-	0.3(1+)	1.06	2	133	94	1 year	0	0	0	0	0
91	F	64	2023-04-17 11:23:57	MN	15	49	101.136	50(2+)	10(4+)	7.74	1.9	159	94	0	0	0	0	0	1
92	M	52	2023-04-17 11:23:45	MCD	41.2	87	81.53	-	0.3(1+)	0.16	3	116	81	5 years	1 year	0	0	0	0
93	M	55	2023-04-17 11:23:34	MCD	43.1	167	81.53	-	1.0(2+)	0.16	1.75	177	95	10 years	0	0	0	Ⅲ	1
94	F	27	2023-04-13 11:39:08	LN	18.4	68	99.7059	50(2+)	1.0(2+)	6.41	0.95	120	70	0	0	0	0	0	0
95	M	21	2023-04-10 11:04:04	MCD	16.8	124	81.53	250（3+）	10（4+）	127.1	26.45	153	97	0	0	0	0	Ⅱ	1
96	M	60	2023-04-10 10:54:34	MN	17.4	73	81.53	50（2+）	10（4+）	7.87	5.78	164	99	0	0	0	0	0	1
97	M	42	2023-04-10 10:54:22	MCD	51.6	110	72.3127	-	-	0.2	0.18	131	87	5 years	0	0	0	Ⅱ	0
98	M	41	2023-04-06 11:26:31	HBVN	29.1	142	75.6696	250（3+）	3.0（3+）	951.57	5.98	141	105	0	0	0	0	Ⅲ	1
99	M	47	2023-04-06 11:26:20	MCD	12.6	230	70.6986	250（3+）	10（4+）	29.18	14.94	165	107	First found	0	0	0	0	1
100	M	24	2023-04-06 11:26:08	MCD	21.5	92	81.53	10（+-）	10（4+）	3.76	13.98	132	78	0	0	0	0	Ⅰ	1
101	F	28	2023-04-06 11:25:33	LN	27.7	52	81.53	50（2+）	3.0（3+）	17.89	2.39	159	119	0	0	0	0	0	0
102	M	44	2023-04-06 11:24:38	MN	40.4	67	122.892	50（2+）	3.0（3+）	24.61	1.48	129	73	0	0	0	0	0	0
103	F	50	2023-04-03 10:18:19	Renal Amyloidosis	31.6	65	91.0714	20（1+）	1.0（2+）	1.3	0.7	95	59	0	0	1	0	Ⅰ	0
104	M	66	2023-03-30 10:59:42	FSGS	41.9	115	80.4992	50（2+）	0.3（1+）	5.15	0.93	105	67	0	0	0	0	Ⅲ	0
105	M	29	2023-03-30 10:59:29	MN	37.5	81	120.887	-	0.3（1+）	0.94	3.69	166	102	20 years	0	0	0	0	0
106	M	36	2023-03-30 10:59:19	IgA	44.5	100	81.53	50（2+）	0.3（1+）	10.53	0.53	121	80	0	0	0	0	Ⅱ	0
107	F	55	2023-03-27 10:13:24	multiple myeloma related nephropathy	32.8	238	94.1176	20（1+）	0.15（+-）	1.66	0.42	150	78	2 months	6 years	0	0	Ⅲ	0
108	M	45	2023-03-23 11:15:28	DN	26.4	244	137.112	10（+-）	3.0（3+）	1.66	9.79	162	78	3 years	13 years	0	0	Ⅲ	1
109	M	66	2023-03-23 11:15:16	multiple myeloma related nephropathy	30	90	49.3333	10（+-）	0.3（1+）	0.76	1.92	139	84	0	0	0	0	0	1
110	F	20	2023-03-23 11:15:03	IgA	37.9	51	81.53	-	3.0（3+）	1.48	1.92	125	77	0	0	0	0	0	1
111	F	58	2023-03-23 11:14:54	ANCA-associated glomerulonephritis	38.5	351	14.0171	250（3+）	1.0（2+）	36.86	1.49	140	66	The course of disease is unknown	The course of disease is unknown	0	0	Ⅴ	0
112	F	19	2023-03-22 16:23:41	LN	27	81	89.6296	250（3+）	1.0（2+）	129.78	1.5	164	101	First found	0	0	1	0	1
113	F	40	2023-03-20 11:04:06	IgA	26	148	12.6168	50（2+）	3.0（3+）	30.69	3.47	149	104	0	0	0	0	Ⅲ	1
114	M	50	2023-03-20 11:03:55	HSPN	28.7	98	55.1	250（3+）	3.0（3+）	199.49	3.05	105	76	half a month	0	0	0	0	1
115	M	70	2023-03-20 11:03:44	HSPN	38.3	94	77.7661	50（2+）	1.0（2+）	34.6	1.5	209	101	3 years	0	0	0	0	0
116	F	49	2023-03-20 11:03:33	MN	21.5	55	159.645	10（+-）	3.0（3+）	1.26	13.53	146	103	0	0	0	0	Ⅰ	1
117	F	28	2023-03-16 12:52:13	MCD	20.6	51	107.216	-	10（4+）	3.19	3.05	107	67	0	0	0	0	0	1
118	F	32	2023-03-16 12:14:04	MN	24.6	65	30.5233	50（2+）	3.0（3+）	3.13	1.85	121	89	0	0	0	0	0	1
119	M	45	2023-03-16 12:13:54	IgM	37.1	102	81.53	-	1.0（2+）	1	1.51	141	86	0	0	0	0	0	0
120	F	44	2023-03-16 12:13:44	IgA	30.6	64	54.9954	250（3+）	3.0（3+）	37.62	3.05	105	75	6 years	0	0	0	0	0
121	M	56	2023-03-16 12:13:37	MN	23.5	103	110.497	250（3+）	10（4+）	4.36	6.54	187	113	2 years	0	0	0	Ⅱ	1
122	M	59	2023-03-16 12:13:28	Crescentic glomerulonephritis	17.4	277	76.075	250（3+）	3.0（3+）	93.19	6.09	153	92	1 year	0	0	0	Ⅳ	1
123	M	23	2023-03-13 10:42:31	MCD	44.9	83	81.53	-	3.0（3+）	1.04	0.17	107	89	0	0	0	0	0	0
124	M	57	2023-03-13 10:41:51	MN	21	79	103.256	10（+-）	10（4+）	5.4	12.85	143	99	0	0	0	0	0	1
125	F	33	2023-03-13 10:41:32	MN	37.4	44	81.53	10（+-）	0.3（1+）	2	2.12	116	68	0	0	0	0	Ⅰ	0
126	F	69	2023-03-09 10:58:03	MN	25	66	138.374	50（2+）	3.0（3+）	11.09	6.44	106	72	0	0	0	0	Ⅱ	1
127	M	48	2023-03-09 10:57:48	DN	19.7	179	81.53	250（3+）	3.0（3+）	20.47	13.45	112	70	1 month	16 years	0	0	Ⅲ	1
128	F	21	2023-03-09 10:41:49	LN	26.1	71	117.415	250（3+）	10（4+）	53.5	3.7	102	72	0	0	0	0	0	1
129	M	41	2023-03-08 15:32:36	MN	29.8	90	81.53	20（1+）	10（4+）	23.76	10.88	112	62	4 months	0	0	0	0	1
130	F	32	2023-03-08 15:32:11	IgA	36.6	60	81.53	250（3+）	3.0（3+）	146.38	1.65	142	95	1 year	0	0	0	0	0
131	M	49	2023-03-06 11:54:56	DN	34.5	107	157.563	-	3.0（3+）	1.55	3.49	140	96	1 year	1 year	0	0	Ⅲ	0
132	M	55	2023-03-06 11:54:44	MN	23.5	73	66.3562	50（2+）	1（2+）	4.23	4.03	115	65	0	0	0	0	0	1
133	M	75	2023-03-06 11:54:34	LN	31	73	81.53	250（3+）	1.0（2+）	10.35	2.6	142	73	0	1 year	0	0	Ⅱ	0
134	F	22	2023-03-06 11:54:25	MN	25.1	50	171.216	250（3+）	10（4+）	81.79	3.05	115	80	0	0	0	0	0	1
135	M	71	2023-03-06 11:54:14	MCD	20.2	170	81.53	20（1+）	10（4+）	4.03	8.72	148	103	7 years	0	0	0	Ⅲ	1
136	F	67	2023-03-02 10:55:55	MN	23.9	229	67.156	50（2+）	3.0（3+）	1.01	5.94	153	78	First found	0	0	1	Ⅳ	1
137	M	70	2023-02-27 10:55:24	LN	19	176	83.3333	250（3+）	3.0（3+）	40.32	5.05	169	75	The course of disease is unknown	0	0	0	Ⅲ	1
138	F	58	2023-02-27 10:55:03	LN	30.5	65	73.9394	-	1.0（2+）	0.88	1.6	129	73	0	0	0	0	Ⅰ	0
139	M	62	2023-02-27 10:54:49	Hypertensive Renal Disease	41.5	116	107.647	-	1.0（2+）	0.5	3.91	170	112	2 years	0	0	0	Ⅲ	0
140	F	50	2023-02-23 10:40:01	DN	28.1	59	113.538	50（2+）	10（4+）	3.11	5	181	95	half a month	1 year	0	0	0	1
141	M	74	2023-02-23 10:39:31	MN	31.6	236	64.1379	20（1+）	3.0（3+）	0.59	5.73	148	82	10 years	0	0	1	Ⅳ	1
142	F	21	2023-02-23 10:37:19	LN	19.5	69	113.636	250（3+）	10（4+）	522.76	6.89	139	76	0	0	0	0	0	1
143	M	37	2023-02-23 09:49:53	LN	30.6	69	29.5276	10（+-）	1.0（2+）	4.23	2.3	140	79	0	0	0	0	0	0
144	M	16	2023-02-23 09:49:20	LN	34.4	62	114.462	50（2+）	10（4+）	31.34	1.98	140	76	0	0	0	0	0	0
145	M	33	2023-02-20 11:54:52	Hypertensive Renal Disease	44.7	140	86.2069	-	0.3（1+）	0.22	1.84	181	122	4 years	0	0	0	Ⅱ	0
146	M	65	2023-02-20 11:53:36	MN	27.8	78	120	20（1+）	0.3（1+）	1.69	3.05	105	60	The course of disease is unknown	0	0	0	0	0
147	F	28	2023-02-20 11:52:14	MN	35.4	47	29.4118	10（+-）	3.0（3+）	8.77	1.58	104	72	0	0	0	0	0	0
148	F	38	2023-02-20 11:44:48	LN	29	75	87.39	250（3+）	0.3（1+）	24.46	0.75	131	98	0	0	0	0	0	0
149	M	29	2023-02-20 11:43:40	MN	19	83	109.28	250（3+）	10（4+）	40.86	12.83	161	105	The course of disease is unknown	0	0	0	0	1
150	M	49	2023-02-20 11:42:45	DN	38.6	829	5.88	50（2+）	0.15（+-）	0.18	0.14	181	104	0	7 months	1	0	Ⅴ	0
151	M	48	2023-02-16 10:41:24	MN	15.3	139	51.26	250（3+）	10（4+）	42.3	10.46	135	103	0	0	0	0	Ⅱ	1
152	M	54	2023-02-16 10:40:08	MN	18.1	80	96.27	50（2+）	10（4+）	46.19	8.84	129	89	2 years	0	0	0	0	1
153	M	64	2023-02-14 16:52:08	ANCA-associated glomerulonephritis	28.2	647	7.14	250（3+）	1.0（2+）	45.41	9.59	152	86	First found	0	0	1	0	1
154	F	67	2023-02-13 10:37:10	LN	38.1	102	49.15	50（2+）	0.15（+-）	8.48	0.18	112	52	0	0	0	0	Ⅲ	0
155	M	52	2023-02-13 10:36:58	MN	18	79	98.14	10（+-）	10（4+）	3.6	3.05	96	72	2 months	2 months	0	0	0	0
156	F	40	2023-02-09 10:55:50	MPGN	31.5	429	10.46	50（2+）	10（4+）	6.46	5.69	164	94	3 years	0	0	0	Ⅴ	1
157	F	46	2023-02-09 10:51:07	IgA	41.1	67	94.69	250（3+）	0.15（+-）	56.93	0.04	120	79	0	0	0	0	0	0
158	M	41	2023-02-09 10:30:11	LN	34.6	75	108.31	-	1.0（2+）	0.76	3.05	96	73	0	0	0	0	0	0
159	F	19	2023-02-09 10:24:58	LN	18.7	116	58.95	250（3+）	3.0（3+）	28.4	5.06	126	75	0	0	0	0	Ⅲ	1
160	F	28	2023-02-09 10:24:43	LN	17.3	73	96.87	250（3+）	3.0（3+）	18.27	12.18	120	85	0	0	0	0	0	1
161	F	57	2023-02-09 10:16:26	MPGN	40.6	99	54.67	250（3+）	0.3（1+）	29.63	3.05	138	81	4 years	0	0	0	Ⅱ	0
162	M	65	2023-02-06 11:15:13	ANCA-associated glomerulonephritis	23.2	798	5.5	250（3+）	3.0（3+）	30.87	3.05	126	83	0	0	0	0	Ⅴ	0
163	M	36	2023-02-06 10:58:54	IgA	41.5	117	68.69	10（+-）	0.3（1+）	3.82	0.56	126	93	0	0	0	0	Ⅱ	0
164	F	71	2023-02-02 11:27:56	MCD	15.1	251	16.09	250（3+）	3.0（3+）	54.56	4.84	156	93	6 years	0	0	1	0	1
165	F	20	2023-02-02 10:39:40	LN	30.9	53	131.67	20（1+）	1.0（2+）	9.7	1.76	122	83	0	0	0	0	0	0
166	M	73	2023-01-30 11:07:38	MN	24.6	95	68.14	50（2+）	10（4+）	23.58	6.97	198	80	First found	0	0	0	Ⅱ	1
167	M	22	2023-01-30 11:07:22	IgA	33.2	204	38.7	250（3+）	3.0（3+）	12.31	5.54	154	102	First found	0	0	0	Ⅳ	0
168	F	38	2023-01-30 11:07:09	MN	33.1	52	116.76	-	1.0（2+）	1.33	2.3	153	93	0	0	1	0	0	0
169	M	22	2023-01-30 11:06:53	IgA	45.4	79	121.16	-	0.3（1+）	0.34	1.22	159	94	1 year	0	0	0	0	0
170	F	26	2023-01-16 10:44:15	IgA	43.2	83	84.11	50（2+）	1.0（2+）	2.7	1.58	131	97	3 months	0	1	0	Ⅱ	0
171	F	38	2022-12-21 15:51:09	IgA	27	125	47.13	250（3+）	3.0（3+）	63.85	3.32	154	101	0	0	0	0	Ⅲ	1
172	M	63	2022-12-19 11:01:34	Renal Amyloidosis	15.7	94	74.04	10（+-）	10（4+）	7.06	12.91	98	75	0	0	0	0	Ⅱ	1
173	F	36	2022-12-19 11:01:23	LN	21.2	50	119.95	20（1+）	3.0（3+）	5.8	2.68	128	91	0	0	0	0	0	0
174	F	46	2022-12-19 11:01:12	MN	21.4	95	62.08	50（2+）	10（4+）	23.42	14.33	133	81	5 years	0	0	0	Ⅱ	1
175	F	55	2022-12-15 11:58:32	Renal Amyloidosis	24.3	54	102.34	10（+-）	10（4+）	0.86	4.47	128	73	0	0	0	0	0	1
176	F	28	2022-12-15 11:58:08	IgA	40.3	54	123.71	250（3+）	1.0（2+）	10.42	3.05	100	66	0	0	0	0	0	0
177	M	51	2022-12-12 11:12:24	MCD	38.1	109	67.35	250（3+）	1.0（2+）	43.92	0.8	132	86	10 years	0	0	0	Ⅱ	0
178	M	57	2022-12-12 11:12:13	MN	24.9	109	64.57	50（2+）	3.0（3+）	9.4	7.77	135	82	0	0	0	0	Ⅱ	1
179	M	62	2022-12-12 11:12:02	Hypertensive Renal Disease	42.9	108	63.04	-	3.0（3+）	0.5	2.17	187	113	20 years	0	0	0	Ⅱ	0
180	F	24	2022-12-12 11:11:13	IgA	42.1	57	124.99	250（3+）	0.3（1+）	103.93	3.05	101	72	0	0	0	0	Ⅰ	0
181	M	50	2022-12-08 10:53:56	MN	23.1	89	86.66	50（2+）	3.0（3+）	7.65	9.12	140	95	First found	0	0	0	0	1
182	M	77	2022-12-08 10:53:44	MN	19.8	200	26.93	50（2+）	10（4+）	6.19	11.27	164	108	First found	0	0	0	Ⅳ	1
183	F	56	2022-12-05 10:11:35	MN	21.1	65	91.56	10（+-）	3.0（3+）	6.88	7.64	137	76	2 years	0	0	0	Ⅰ	1
184	F	53	2022-12-01 14:44:50	LN	25.1	108	50.61	250（3+）	1.0（2+）	79.92	4.59	111	75	0	0	0	0	Ⅲ	1
185	F	34	2022-12-01 10:23:33	IgA	40.7	61	113.94	250（3+）	0.3（1+）	100.64	3.05	116	79	0	0	0	0	0	0
186	F	34	2022-11-28 10:20:09	MCD	42.7	64	108.88	250（3+）	0.15（+-）	26.39	0.09	113	65	0	0	0	0	0	0
187	F	36	2022-11-24 11:22:25	MCD	16.3	60	112.96	10（+-）	10（4+）	3.4	7.1	96	61	0	0	0	0	Ⅰ	1
188	M	37	2022-11-24 11:22:06	IgA	46.1	85	100.37	50（2+）	1.0（2+）	17.24	0.65	116	71	0	0	0	0	0	0
189	M	17	2022-11-24 11:21:55	IgA	40.8	91	81.0989	250（3+）	1.0（2+）	87.19	1.05	121	69	0	0	0	0	0	0
190	M	58	2022-11-24 11:20:37	MN	19.1	129	52.3	50（2+）	10（4+）	22.45	17.06	158	96	First found	0	0	0	Ⅲ	1
191	F	39	2022-11-21 10:09:42	MCD	39.3	64	105.12	250（3+）	0.15（+-）	45.16	3.05	136	83	0	0	0	0	Ⅰ	0
192	F	55	2022-11-21 10:09:33	DN	28.8	289	15.18	-	0.15（+-）	0.43	0.36	133	66	0	10 years	0	0	Ⅳ	0
193	M	45	2022-11-17 10:18:32	MN	19.6	126	58.96	50（2+）	10（4+）	28.57	13.32	156	105	2 years	0	0	0	Ⅲ	1
194	M	59	2022-11-17 10:18:22	TIN	39.2	208	29.15	250（3+）	-	109.66	0.65	129	85	6 years	6 years	0	1	Ⅳ	0
195	F	15	2022-11-17 10:03:15	LN	26.5	69	108.696	300（3+）	5（3+）	13.19	1.11	137	67	0	0	0	0	0	0
196	M	57	2022-11-14 10:11:32	MN	19.9	87	84.8	50（2+）	10（4+）	3.67	3.44	187	99	half a year	0	0	0	Ⅱ	1
197	M	35	2022-11-10 11:07:52	MN	27	79	110.59	20（1+）	3.0（3+）	9.54	3.23	134	87	0	0	0	0	Ⅰ	1
198	F	49	2022-11-10 11:07:38	DN	27.2	157	33.11	20（1+）	10（4+）	8.87	14.01	140	70	5 months	3 years	0	0	Ⅲ	1
199	F	60	2022-11-10 11:07:27	ANCA-associated glomerulonephritis	29.2	875	3.84	250（3+）	1.0（2+）	10.4	0.43	134	85	First found	0	0	1	0	0
200	F	32	2022-11-10 11:07:15	IgA	45.3	84	79.48	20（1+）	1.0（2+）	3.67	0.98	120	84	0	0	0	0	Ⅱ	0
201	F	16	2022-11-10 09:13:17	LN	24.8	42	177.143	-	10（4+）	0.7	2.98	120	76	0	0	0	0	0	0
202	M	54	2022-11-07 11:13:29	MN	26.3	76	98.32	250（3+）	10（4+）	18.45	6.96	122	75	0	0	0	0	Ⅰ	1
203	M	56	2022-11-07 11:13:18	MN	29	73	98.57	10（+-）	1.0（2+）	3.24	5.54	122	87	5 years	0	0	0	Ⅰ	1
204	M	58	2022-11-07 11:13:00	IgA	46.6	87	84.2	50（2+）	1.0（2+）	7.15	0.53	140	89	0	0	0	0	Ⅰ	0
205	M	76	2022-11-07 11:08:43	MN	26.6	96	65.88	50（2+）	10（4+）	10.39	0.89	123	80	4 months	0	0	0	Ⅰ	1
206	F	45	2022-11-03 10:19:36	IgA	39.3	70	89.8	50（2+）	0.3（1+）	11.74	0.1	129	84	0	0	0	0	Ⅰ	0
207	M	51	2022-11-03 10:19:17	MN	20	90	84.9	-	1.0（2+）	2.34	6.65	166	112	10 years	0	0	0	Ⅱ	1
208	F	45	2022-10-31 11:18:07	IgA	42.2	85	71.51	50（2+）	1.0（2+）	5	0.59	128	74	2 years	0	0	0	Ⅱ	0
209	M	29	2022-10-31 11:16:18	HSPN	40.1	176	44.04	50（2+）	1.0（2+）	1.64	2.5	140	108	5 months	0	0	0	Ⅲ	0
210	M	28	2022-10-31 11:14:48	FSGS	31.64	121	69.77	50（2+）	1.0（2+）	61.63	1.45	145	89	1 year	0	0	0	Ⅲ	0
211	M	28	2022-10-27 10:52:46	Obesity-related glomerulopathy	40.7	62	128.32	-	1.0（2+）	0.63	1.01	175	102	1 week	0	0	0	0	0
212	M	66	2022-10-27 10:51:45	LN	14.5	99	68.09	250（3+）	1.0（2+）	97.4	2.7	168	107	0	0	0	0	0	0
213	F	63	2022-10-27 10:45:25	MCD	19.5	80	67.81	10（+-）	1.0（2+）	0.43	4.29	129	89	10 years	10 years	0	0	Ⅱ	1
214	F	48	2022-10-27 10:43:54	IgA	31.64	56	106.22	10（+-）	1.0（2+）	5.4	0.61	138	69	0	0	1	0	Ⅰ	0
215	M	50	2022-10-27 10:42:57	Crescentic glomerulonephritis	19.9	941	5.01	250（3+）	3.0（3+）	329.9	1.62	128	82	0	0	0	1	0	0
216	M	62	2022-10-27 09:39:51	DN	29.3	185	32.89	20（1+）	10（4+）	10.44	10.47	139	73	20 years	11 year	0	0	Ⅳ	1
217	F	48	2022-10-24 10:23:18	LN	24.8	77	78.91	250（3+）	10（4+）	96.61	8.37	154	83	First found	0	0	0	Ⅱ	1
218	M	69	2022-10-24 10:22:00	TIN	31.7	381	13.07	-	-	0.23	0.21	164	82	0	0	0	1	0	0
219	M	66	2022-10-24 10:20:29	DN	31.4	71	92.94	10（+-）	3.0（3+）	9.52	4.54	131	81	0	The course of disease is unknown	0	0	0	1
220	M	59	2022-10-20 10:52:38	MN	14.7	131	50.98	50(2+)	10(4+)	22.95	19.24	120	70	0	0	1	0	Ⅲ	1
221	F	46	2022-10-20 10:49:56	MCD	32.1	59	105.89	-	1.0（2+）	1.3	5.93	138	94	0	0	0	0	0	1
222	F	36	2022-10-20 10:48:10	IgA	17.33	75	88.63	250(3+)	3.0（3+）	70.34	4.84	122	88	0	0	0	0	0	1
223	M	70	2022-10-20 10:46:18	MN	25.6	56	99.62	250(3+)	1.0(2+)	35.84	5.5	144	94	7 years	0	0	0	0	1
224	M	73	2022-10-17 10:53:55	MN	23	111	56.45	10（+-）	10(4+)	5.54	4.43	142	68	10 years	0	0	0	Ⅲ	1
225	F	22	2022-10-17 10:53:44	LN	37	60	124.64	20(1+)	0.3(1+)	5.4	0.31	124	64	0	0	0	0	0	0
226	F	52	2022-10-17 10:53:32	MN	27.7	34	121.7	50(2+)	3.0(3+)	15.97	6.66	131	89	0	1 month	0	0	0	1
227	M	51	2022-10-13 11:43:42	MCD	39.4	89	86.05	50(2+)	1.0(2+)	16.92	1.59	135	79	6 years	0	0	0	0	0
228	M	38	2022-10-13 11:42:43	IgA	44.4	81	105.65	50(2+)	0.3(1+)	25.78	3.05	111	66	0	0	0	0	0	0
229	M	45	2022-10-13 11:41:18	FSGS	39.4	108	71.03	250(3+)	1.0(2+)	48.17	0.58	155	99	3 months	0	0	0	Ⅱ	0
230	M	47	2022-10-13 11:40:24	MCD	39.4	108	70.04	-	-	0.2	0.09	131	89	1 year	0	0	1	0	0
231	M	61	2022-10-13 11:39:28	ANCA-associated glomerulonephritis	23.5	741	6.19	250(3+)	1.0(2+)	100.773	0.57	115	67	5 years	0	0	1	0	0
232	F	23	2022-10-10 11:19:23	MPGN	22.6	9	132.29	20(1+)	3.0(3+)	5.94	6.46	113	71	0	0	0	0	0	1
233	F	33	2022-10-10 11:16:44	MCD	41.7	41	130.77	20(1+)	0.3(1+)	2.97	0.84	129	82	0	0	0	0	0	0
234	F	58	2022-10-10 11:15:12	MCD	43.7	99	54.29	50(2+)	-	2.2	0.22	108	77	0	0	0	0	Ⅲ	0
235	M	60	2022-10-10 11:13:50	TIN	34.4	803	5.65	250(3+)	1.0(2+)	88.02	0.26	149	76	10 years	3 years	0	1	0	0
236	F	23	2022-09-29 11:12:03	MN	25.7	40	141.43	250(3+)	10(4+)	22.84	1.94	114	65	0	0	0	0	0	1
237	F	47	2022-09-29 11:11:28	IgA	28.5	93	63.25	20(1+)	0.3(1+)	0.27	0.86	120	74	0	0	0	0	Ⅲ	0
238	M	34	2022-09-29 11:10:49	IgA	34.9	124	64.94	50(2+)	10(4+)	44.66	7.33	145	100	First found	0	0	0	Ⅲ	1
239	M	44	2022-09-29 11:10:10	IgA	35.4	99	79.47	50(2+)	0.3(1+)	1.94	0.19	141	83	0	First found	0	0	Ⅰ	0
240	F	66	2022-09-29 11:08:36	MN	22.9	61	91	20(1+)	3.0(3+)	1.64	2.54	118	71	7 years	7 years	0	0	0	1
241	F	56	2022-09-26 11:54:20	Hypertensive Renal Disease	32	88	63.48	20(1+)	10(4+)	8.46	2.98	145	98	10 years	0	0	0	0	1
242	M	48	2022-09-26 11:53:28	MN	32.6	58	114.6	20(1+)	0.3(1+)	9.74	1.04	108	77	0	0	0	0	Ⅰ	1
243	F	40	2022-09-26 11:52:48	MCD	24.7	49	117.4	50(2+)	1.0(2+)	1.8	2.06	107	66	0	0	0	0	0	1
244	F	45	2022-09-26 11:50:53	LN	27.1	312	14.85	50(2+)	3.0(3+)	28.57	2.03	183	109	0	0	0	0	Ⅳ	0
245	M	56	2022-09-22 10:58:15	DN	40.8	105	68.03	-	0.3(1+)	0.34	0.53	103	68	2 years	20 years	0	0	Ⅱ	0
246	M	45	2022-09-22 10:57:15	MN	17.2	88	90.99	10（+-）	3.0(3+)	17.1	5	121	82	0	0	0	0	0	1
247	M	39	2022-09-22 10:55:59	FSGS	34.2	232	29.4	50(2+)	3.0(3+)	14	4.72	108	79	5 months	0	0	0	Ⅳ	0
248	F	48	2022-09-22 10:53:10	LN	31.2	53	108.16	250(3+)	1.0(2+)	54.86	1.43	114	78	0	0	0	0	0	0
249	F	70	2022-09-22 10:30:23	FSGS	35.7	495	7.13	250(3+)	3.0(3+)	83.61	1.67	175	100	0	0	0	0	Ⅲ	0
250	M	68	2022-09-22 10:30:11	HSPN	26.8	54	102.55	250(3+)	1.0(2+)	276.46	1.09	125	84	0	0	0	0	0	0
251	F	62	2022-09-19 11:11:48	MN	33.3	42	105.82	50(2+)	10(4+)	5.71	3.49	145	89	0	0	0	0	Ⅰ	1
252	M	56	2022-09-19 11:11:08	DN	31.6	94	77.77	10（+-）	3.0(3+)	3.62	2.27	144	85	10 years	20 years	0	0	Ⅱ	1
253	M	62	2022-09-19 11:10:23	MCD	18.1	89	79.65	10（+-）	3.0(3+)	0.63	2.47	122	85	10 years	0	0	0	0	1
254	F	59	2022-09-19 11:09:37	MN	23.6	48	103.43	20(1+)	3.0(3+)	4.45	5.71	142	85	8 years	0	0	0	0	1
255	M	38	2022-09-15 10:15:15	MCD	54.7	119	66.36	-	-	2.34	0.26	154	99	First found	First found	0	1	0	0
256	F	33	2022-09-15 10:15:02	MsPGN	41.2	85	77.8	-	0.15(+-)	0.61	0.38	115	79	First found	0	0	0	Ⅱ	0
257	M	16	2022-09-15 10:14:46	MN	22.8	71	104.789	-	3.0(3+)	0.56	3.39	127	59	0	0	0	0	0	1
258	M	43	2022-09-15 10:14:32	IgA	47.5	75	106.8	50(2+)	3.0(3+)	17.08	0.51	131	86	0	0	0	0	Ⅰ	0
259	F	31	2022-09-08 11:17:05	LN	25.3	54	121.13	50(2+)	0.15(+-)	7.56	0.1	114	77	0	0	0	0	0	0
260	M	28	2022-09-08 11:16:51	MCD	45.6	105	82.82	-	-	0.11	3.05	124	83	0	0	0	0	Ⅱ	0
261	M	65	2022-09-08 11:16:37	DN	29.1	165	36.98	50(2+)	3.0(3+)	2.77	3.03	145	67	1 year	10 years	0	0	Ⅲ	0
262	M	26	2022-09-05 11:05:14	IgA	41.2	78	118.42	20(1+)	0.3(1+)	9.58	0.2	154	88	0	0	0	0	Ⅰ	0
263	M	18	2022-09-05 10:58:44	MCD	14.7	66	110.909	-	10(4+)	0.36	1.46	116	62	0	0	0	0	0	1
264	F	74	2022-09-05 10:58:28	ANCA-associated glomerulonephritis	28.3	408	8.76	50(2+)	0.3(1+)	6.19	0.42	159	81	10 years	0	0	1	0	0
265	M	56	2022-09-01 11:09:10	DN	37.2	241	24.91	-	3.0(3+)	2.34	2.87	148	76	3 years	1 month	0	0	Ⅳ	0
266	M	52	2022-09-01 11:08:59	DN	30.9	109	66.88	20(1+)	3.0(3+)	8.64	8.9	153	88	2 years	5 years	0	0	Ⅲ	0
267	M	42	2022-09-01 11:08:49	MsPGN	26.6	154	47.24	250(3+)	3.0(3+)	29.29	4.82	113	71	0	0	0	1	0	1
268	M	49	2022-09-01 11:08:39	TIN	46.3	171	39.63	-	-	0.2	0.14	131	84	8 years	0	0	1	0	0
269	F	43	2022-09-01 11:08:28	MN	38.9	62	106.39	-	0.15(+-)	4.57	3.05	131	89	5 months	0	0	0	0	0
270	F	20	2022-08-29 11:02:32	IgA	43.9	58	128.72	10（+-）	0.3(1+)	4.57	0.28	122	86	0	0	0	0	Ⅰ	0
271	M	49	2022-08-29 11:02:20	MN	23.9	67	107.25	50(2+)	10(4+)	7.72	8.14	104	53	0	0	0	0	Ⅰ	1
272	M	46	2022-08-29 11:02:04	IgA	40.2	102	75.58	50(2+)	1.0(2+)	22.63	0.66	127	83	0	0	0	0	Ⅱ	0
273	F	64	2022-08-25 10:05:22	MN	18.5	54	96.07	-	3.0(3+)	0.59	9.31	119	81	0	0	0	0	0	1
274	M	55	2022-08-25 10:05:08	IgA	40.7	74	98.71	20(1+)	0.3(1+)	7.42	0.36	136	86	0	0	0	0	0	0
275	F	55	2022-08-25 10:04:49	Crescentic glomerulonephritis	27.2	398	10.31	250(3+)	3.0(3+)	1800	2.23	127	76	First found	0	0	1	0	0
276	F	18	2022-08-25 10:03:46	LN	30.3	60	122	50(2+)	10(4+)	11.25	3.61	110	63	0	0	0	0	Ⅰ	0
277	F	31	2022-08-22 10:36:07	HSPN	44.6	71	98.08	250(3+)	-	73.58	0.25	105	68	0	0	0	0	0	0
278	F	54	2022-08-22 10:35:56	MN	23.3	53	103.69	250(3+)	3.0(3+)	117.61	1.84	116	78	0	0	0	0	0	1
279	M	21	2022-08-22 10:35:35	LN	30.1	97	95.74	50(2+)	1.0(2+)	22.61	1.2	130	76	0	0	0	0	0	0
280	F	30	2022-08-22 10:33:51	MN	25.8	73	95.51	50(2+)	10(4+)	63.04	3.59	90	63	0	0	0	0	0	1
281	F	39	2022-08-18 11:00:05	LN	35.7	42	124.38	-	1.0(2+)	1.98	0.56	122	73	0	0	0	0	0	0
282	F	68	2022-08-18 10:24:42	ANCA-associated glomerulonephritis	33.1	258	15.89	50(2+)	1.0(2+)	2.99	3.05	139	82	1 month	0	0	0	Ⅳ	0
283	M	29	2022-08-15 10:23:50	MCD	18.5	96	91.65	-	3.0(3+)	0.81	8.35	122	74	0	0	0	0	0	1
284	M	68	2022-08-15 10:22:57	ANCA-associated glomerulonephritis	32.5	1023	3.99	250(3+)	0.3(1+)	12.94	0.88	137	80	0	0	0	0	Ⅴ	0
285	F	49	2022-08-11 10:38:01	MN	36.1	56	105.47	20(1+)	1.0(2+)	5.62	1.52	132	91	3 years	0	0	0	0	0
286	M	44	2022-08-11 10:37:50	MN	33.1	70	109	-	3.0(3+)	1.84	13.85	142	85	2 years	0	0	0	0	1
287	F	40	2022-08-11 10:37:40	FSGS	33.2	265	18.87	250(3+)	1.0(2+)	11.43	2.49	153	104	2 weeks	0	0	0	Ⅳ	0
288	F	33	2022-08-08 11:09:16	HSPN	35.4	42	129.74	50(2+)	-	19.82	0.23	130	50	0	0	0	0	0	0
289	F	32	2022-08-08 11:09:03	IgM	44.7	52	121.78	10（+-）	1.0(2+)	5.51	3.05	129	87	0	0	0	0	0	0
290	F	19	2022-08-08 11:08:48	MN	23.3	55	130.99	-	1.0(2+)	2.77	1.18	122	77	0	0	0	0	0	1
291	F	37	2022-08-08 11:07:36	LN	34.2	144	40	20(1+)	0.3(1+)	0.52	0.63	148	76	First found	0	0	0	Ⅲ	0
292	F	34	2022-08-04 11:27:27	IgA	40.9	50	121.65	50(2+)	0.3(1+)	59.69	0.53	132	70	0	0	0	0	0	0
293	M	71	2022-08-04 11:26:25	MCD	19.4	165	35.45	-	3.0(3+)	0.74	0.95	110	71	0	0	0	0	Ⅲ	0
294	M	27	2022-08-01 11:06:44	IgA	39.7	132	63.24	50(2+)	3.0(3+)	15.01	1.13	157	106	1 month	0	0	0	Ⅲ	0
295	M	73	2022-08-01 11:06:33	MN	26.8	81	82.62	-	0.3(1+)	1.42	3.05	155	81	half a year	1 month	0	0	0	1
296	F	51	2022-07-28 10:28:49	FSGS	38.9	119	45.65	20(1+)	1.0(2+)	2.29	1.31	128	77	4 years	0	0	0	Ⅲ	0
297	M	67	2022-07-25 11:09:54	DN	30.6	216	26.33	-	0.15(+-)	0.11	0.16	146	86	10 years	10 years	0	1	0	0
298	F	66	2022-07-25 11:09:42	TIN	29.8	228	18.72	20(1+)	-	1.49	0.12	150	72	10 years	8 years	0	0	Ⅳ	0
299	M	53	2022-07-25 11:09:30	MCD	50.7	114	62.9	50(2+)	1.0(2+)	6.61	0.17	99	72	0	0	0	0	Ⅱ	0
300	M	34	2022-07-25 11:09:16	IgA	42.1	114	71.88	50(2+)	1.0(2+)	13.52	0.42	137	77	0	0	0	0	Ⅱ	0
301	F	64	2022-07-25 11:09:04	MN	23.4	47	100.56	50(2+)	3.0(3+)	5.58	4.22	125	74	3 months	20 years	0	0	0	1
302	M	64	2022-07-21 11:10:33	IgA	34.5	78	90.68	50(2+)	0.3(1+)	31.52	3.05	109	66	0	0	0	0	0	0
303	M	62	2022-07-21 11:10:23	ANCA-associated glomerulonephritis	35.7	164	38.04	250(3+)	0.3(1+)	25.45	0.51	137	77	0	0	0	0	Ⅲ	0
304	M	63	2022-07-21 11:10:14	Renal Amyloidosis	21.5	89	79.1	10（+-）	10(4+)	4.07	3.36	121	76	0	0	0	0	Ⅱ	1
305	M	33	2022-07-21 11:10:04	IgA	45.4	124	65.39	250(3+)	1.0(2+)	212	1.6	132	95	2 months	0	0	0	Ⅱ	0
306	M	77	2022-07-21 11:09:55	IgA	30.5	129	45.77	250(3+)	0.3(1+)	84.17	1.42	92	65	0	0	0	0	Ⅲ	0
307	F	26	2022-07-21 10:12:26	LN	34.3	40	138.48	20(1+)	1.0(2+)	4.75	0.93	116	72	0	0	0	0	0	0
308	F	22	2022-07-21 10:12:11	LN	38.7	58	126.04	-	0.3(1+)	1.35	3.05	155	113	0	0	0	0	0	0
309	F	30	2022-07-18 10:22:32	C3	36.9	54	121.98	250(3+)	0.3(1+)	52.78	0.46	102	61	0	0	0	0	0	0
310	M	15	2022-07-14 11:23:27	MCD	30.3	121	61.9835	250(3+)	3.0(3+)	13.21	6	143	57	0	0	0	0	0	1
311	M	55	2022-07-14 11:23:17	MN	20.8	115	61.37	20(1+)	3.0(3+)	2.97	8.24	136	78	0	0	0	0	Ⅱ	1
312	M	57	2022-07-14 11:23:08	IgA	35	833	5.52	250(3+)	1.0(2+)	103.19	0.17	130	79	0	0	0	1	0	0
313	M	67	2022-07-11 11:19:40	MCD	26.2	130	48.64	20(1+)	1.0(2+)	2.52	3.52	136	87	0	0	0	1	0	1
314	M	58	2022-07-11 11:17:53	MN	25	110	63.41	20(1+)	3.0(3+)	4.36	2.82	100	80	0	0	0	0	Ⅱ	1
315	F	64	2022-07-11 11:17:35	MCD	22.9	67	83.44	250(3+)	3.0(3+)	47.92	3.73	125	71	2 years	0	0	0	0	1
316	M	15	2022-07-07 11:13:59	MN	26	56	133.929	20(1+)	10(4+)	9.4	22.33	141	71	0	0	0	0	0	1
317	F	63	2022-07-07 10:55:48	MN	29.8	39	107.68	10（+-）	1.0(2+)	1.57	2.9	117	81	0	The course of disease is unknown	0	0	0	1
318	M	65	2022-07-07 10:55:36	MN	27.7	79	89.57	50(2+)	10(4+)	33.25	7.42	150	90	1 year	0	0	0	0	1
319	F	14	2022-07-07 10:55:24	LN	23.4	70	108	250(3+)	10(4+)	16.13	15.55	133	76	0	0	0	0	0	0
320	F	33	2022-07-04 10:28:29	FSGS	40.3	140	42.56	-	0.3(+)	0.41	0.8	118	76	0	0	0	0	Ⅱ	0
321	M	46	2022-07-04 10:28:19	IgA	34.8	155	45.57	50(2+)	3.0(3+)	13.01	8.17	147	94	4 years	0	0	0	Ⅲ	1
322	M	70	2022-06-30 11:53:20	MCD	39.3	80	86.04	250(3+)	1.0(2+)	10.17	0.92	103	53	0	8 years	0	0	0	0
323	F	34	2022-06-30 11:52:36	IgA	39.2	43	127.83	250(3+)	0.3(1+)	227.52	0.12	126	78	0	0	0	0	0	0
324	F	70	2022-06-30 11:50:09	ANCA-associated glomerulonephritis	26.7	1070	2.81	250(3+)	0.15(+-)	13.46	0.11	125	88	0	0	0	0	Ⅴ	0
325	F	15	2022-06-27 10:27:35	MCD	17.2	62	120.968	250(3+)	10(4+)	118.76	8.48	101	66	0	0	0	0	0	1
326	M	54	2022-06-27 10:27:25	MN	14.7	79	97.45	50(2+)	10(4+)	14.67	5.7	102	72	0	0	0	0	0	1
327	F	45	2022-06-23 11:51:24	IgA	36.2	80	76.95	50(2+)	3.0(3+)	12.73	2.21	130	84	0	0	0	0	Ⅱ	0
328	F	50	2022-06-23 11:51:13	MN	29.1	52	107.32	50(2+)	3.0(3+)	2.95	5.66	120	83	0	0	0	0	0	1
329	M	54	2022-06-23 11:51:04	Crescentic glomerulonephritis	20.8	355	15.82	250(3+)	3.0(3+)	375.1	7.7	110	73	3 years	0	0	1	0	0
330	M	66	2022-06-23 11:50:55	ANCA-associated glomerulonephritis	29.5	178	33.5	250(3+)	1.0(2+)	2.81	1.66	110	52	0	0	0	0	Ⅲ	0
331	M	68	2022-06-23 11:50:46	MCD	18.6	444	10.94	20(1+)	10(4+)	2.34	11.34	130	80	0	3 years	0	0	Ⅳ	1
332	M	45	2022-06-23 11:50:36	IgA	36	210	31.79	50(2+)	3.0(3+)	6.66	1.44	142	89	0	0	0	0	Ⅲ	0
333	F	24	2022-06-23 09:24:05	LN	29.6	51	129.65	20(1+)	1.0(2+)	7.72	2.11	133	100	1 year	0	0	0	0	0
334	M	55	2022-06-20 10:40:47	MN	24.5	87	86	50(2+)	3.0(3+)	15.26	6.29	136	77	0	0	0	0	0	1
335	M	64	2022-06-20 10:39:58	LN	29.9	90	77.49	250(3+)	3.0(3+)	8.62	5.54	138	74	First found	0	0	0	Ⅱ	0
336	M	46	2022-06-16 11:42:12	IgA	31.9	172	40.19	50(2+)	1.0(2+)	4.43	4.09	132	80	0	0	0	0	Ⅱ	0
337	M	62	2022-06-16 11:42:04	Hypertensive Renal Disease	20.8	141	45.67	20(1+)	10(4+)	10.4	37.14	190	115	1 year	1 year	0	1	0	1
338	F	29	2022-06-16 11:41:54	IgA	26.3	84	81.17	250(3+)	10(4+)	94.63	5.85	136	88	0	0	0	0	0	1
339	F	38	2022-06-16 11:41:42	MN	23.6	55	114.62	10(+-)	10(4+)	5.4	7.56	134	75	0	0	0	0	0	1
340	F	22	2022-06-13 11:29:21	IgA	40.4	68	110.08	250(3+)	0.3(1+)	31.73	0.44	111	81	3 years	First found	0	0	0	0
341	M	30	2022-06-13 11:29:10	IgA	41.7	103	83.58	250(3+)	1.0(2+)	34.29	1.25	118	87	0	0	0	0	0	0
342	M	53	2022-06-13 11:29:00	MN	16.8	98	75.52	10(+-)	3.0(3+)	18	4.23	132	76	1 month	0	0	0	0	1
343	M	69	2022-06-13 11:28:45	MN	18.7	114	56.22	250(3+)	10(4+)	26.26	9.94	149	78	3 years	0	0	0	Ⅲ	1
344	F	26	2022-06-09 10:05:58	LN	39.7	65	113.04	20(1+)	-	5.78	0.23	135	74	0	0	0	0	0	0
345	M	63	2022-06-06 11:34:55	HBVN	17.5	75	92.8	10(+-)	3.0(3+)	0.16	5.41	102	69	0	0	0	0	0	1
346	F	68	2022-06-06 11:33:36	C3	22.1	169	26.51	250(3+)	3.0(3+)	36.97	4.64	136	88	0	0	0	0	0	0
347	M	48	2022-06-06 11:33:22	MN	21	77	102	50(2+)	3.0(3+)	37.6	3.05	136	78	0	0	0	0	0	1
348	F	43	2022-06-06 11:33:06	MN	24.5	58	108.75	50(2+)	10(4+)	92.9	5.92	117	73	0	0	0	0	0	1
349	F	59	2022-05-30 11:04:38	MCD	12.9	84	65.75	20(1+)	10(4+)	0.83	6.65	112	72	0	0	0	1	0	1
350	F	40	2022-05-30 11:04:26	MN	22.4	51	115.87	20(1+)	10(4+)	6.89	5	117	68	0	0	0	0	0	1
351	M	42	2022-05-27 14:36:31	MCD	48.2	86	95.55	-	0.3(1+)	0.23	0.54	135	93	20 days	0	0	0	0	0
352	M	27	2022-05-27 14:36:18	LN	21	507	12.43	250(3+)	1.0(2+)	18.95	2.7	166	113	0	0	0	0	Ⅴ	0
353	M	63	2022-05-23 10:27:09	ANCA-associated glomerulonephritis	31.4	192	31.22	20(1+)	1.0(2+)	2	0.79	118	74	0	First found	0	0	Ⅲ	0
354	F	58	2022-05-19 11:12:16	Hypertensive Renal Disease	36.9	81	69.19	-	1.0(2+)	0.14	3.05	127	67	10 years	0	1	0	0	0
355	F	34	2022-05-19 10:56:58	MN	22.1	42	128.83	50(2+)	1.0(2+)	7	2.37	100	67	0	0	0	0	0	1
356	M	45	2022-05-19 10:56:48	DN	29	523	10.55	50(2+)	3.0(3+)	6.32	7.31	179	107	6 months	6 years	0	0	Ⅴ	0
357	F	61	2022-05-19 10:56:38	MCD	30.6	58	95.83	-	0.3(1+)	0.9	0.43	154	89	1 year	0	0	0	0	0
358	M	52	2022-05-19 10:56:30	MN	23.7	92	82.09	50(2+)	10(4+)	8.68	7.19	147	81	2 years	0	0	0	0	1
359	M	64	2022-05-19 10:56:19	ANCA-associated glomerulonephritis	25.1	958	4.44	250(3+)	1.0(2+)	60.21	3.05	107	70	First found	0	0	0	Ⅴ	0
360	M	31	2022-05-16 11:32:43	FSGS	15.3	82	108.58	50(2+)	10(4+)	41.24	19.33	123	81	0	0	0	0	0	1
361	M	46	2022-05-16 11:31:58	DN	30	159	44.19	10(+-)	3.0(3+)	2.7	4.3	138	80	1 month	1 year	0	0	0	1
362	M	34	2022-05-16 11:31:24	IgA	35.6	131	60.76	20(1+)	1.0(2+)	4.46	2.28	135	88	0	0	0	0	Ⅲ	0
363	F	48	2022-05-16 11:30:37	MCD	28.9	65	96.85	50(2+)	3.0(3+)	8.28	2.42	110	73	0	0	0	0	0	1
364	M	40	2022-05-16 11:30:20	DN	19.4	163	44.73	250(3+)	3.0(3+)	8.46	5.36	100	61	4 months	8 years	0	0	0	1
365	M	50	2022-05-12 10:55:00	MCD	26.2	78	100.05	50(2+)	3.0(3+)	8.03	1.28	137	99	0	0	0	0	0	1
366	M	58	2022-05-09 11:12:27	TIN	31.6	1059	4.1	250(3+)	0.3(1+)	397.37	0.67	168	79	6 years	1 year	0	1	0	0
367	M	36	2022-05-09 11:12:14	MCD	47.9	100	83.05	50(2+)	-	18.07	3.05	94	73	0	0	0	0	0	0
368	F	30	2022-05-09 11:12:00	IgA	38.4	42	132.5	50(2+)	-	8.28	0.3	101	69	0	0	0	0	0	0
369	F	37	2022-05-05 10:50:10	MN	16.6	49	119.9	（+-）	3+	2	6.19	100	61	0	0	0	0	0	1
370	F	30	2022-05-05 10:49:30	MN	26.3	40	134.64	50(2+)	1.0(2+)	0.65	0.81	107	66	0	0	0	0	0	1
371	F	39	2022-04-28 10:34:29	DN	23.9	76	85.4	10(+-)	3.0(3+)	2.63	7.59	151	77	1 year	1 year	0	0	0	1
372	M	44	2022-04-28 10:31:54	DN	26.1	123	61.13	-	3.0(3+)	2.34	3.05	110	68	half a month	half a month	0	0	Ⅱ	0
373	F	28	2022-04-25 11:13:23	IgA	36.9	59	120.16	20(1+)	0.3(1+)	37.2	3.05	98	62	0	0	0	0	0	0
374	F	32	2022-04-25 11:13:13	LN	23.1	71	97.4	250(3+)	10(4+)	107.23	7.05	134	86	0	0	0	0	0	1
375	F	23	2022-04-25 11:13:02	IgA	37.1	42	139.18	50(2+)	1.0(2+)	83.38	0.35	104	71	0	0	0	0	0	0
376	F	15	2022-04-25 11:12:46	MCD	14.6	118	63.5593	10(4+)	50(2+)	32.22	14.54	145	91	0	0	0	1	0	1
377	M	36	2022-04-21 11:36:29	IgA	39.1	87	98.28	50(2+)	0.3(1+)	12.01	0.58	128	85	2 years	0	0	0	0	0
378	F	25	2022-04-21 11:36:21	IgA	36	61	121.38	50(2+)	1.0(2+)	251.7	0.73	128	95	0	0	0	0	Ⅰ	0
379	M	57	2022-04-21 11:36:10	TIN	18.3	244	24.37	250(3+)	10(4+)	48.44	16.86	142	81	0	0	0	1	0	1
380	M	31	2022-04-18 11:03:07	IgA	44.7	123	66.97	20(1+)	1.0(2+)	8.41	0.53	105	54	0	0	0	0	Ⅱ	0
381	M	48	2022-04-14 11:07:51	MN	22.8	86	91.6	50(2+)	10(4+)	74.2	12.53	130	101	1 year	0	0	0	Ⅰ	1
382	M	49	2022-04-14 11:07:43	Lipoprotein nephropathy	39.6	346	16.9	50(2+)	1.0(2+)	6.35	3.65	148	87	First found	0	0	0	Ⅳ	0
383	M	39	2022-04-14 11:07:26	IgA	36.6	83	101.86	20(1+)	1.0(2+)	9.07	0.94	131	88	0	0	0	0	0	0
384	F	47	2022-04-11 11:04:21	IgA	37.5	88	67.62	50(2+)	0.15(+-)	31.86	0.27	114	83	0	0	0	0	0	0
385	M	53	2022-04-11 11:03:53	Endocapillary proliferative glomerulonephritis	19.7	123	57.38	250(3+)	3.0(3+)	216.36	6.34	130	77	10 days	0	0	0	0	1
386	M	36	2022-04-07 11:48:12	Obesity-related glomerulopathy	42.9	95	88.36	10(+-)	0.3(1+)	1.94	1.04	157	90	1 month	0	0	0	0	0
387	F	48	2022-04-07 11:48:03	IgA	35	62	102.72	50(2+)	1.0(2+)	8.84	0.95	148	97	1 year	0	0	0	0	0
388	F	31	2022-04-07 11:47:51	IgA	36.3	65	109.13	50(2+)	1.0(2+)	26.75	1.83	149	92	0	0	0	0	0	0
389	F	69	2022-04-04 11:02:45	DN	43.3	119	40.23	10(+-)	3.0(3+)	0.43	1.93	140	70	10 years	21 year	0	0	Ⅳ	0
390	M	18	2022-04-04 11:02:12	MCD	15.7	42	174.286	20(1+)	10(4+)	9.38	4.2	142	92	0	0	0	0	0	1
391	M	49	2022-04-04 10:59:46	DN	27.1	159	43.27	-	3.0(3+)	1.33	12.2	203	104	1 month	10 years	0	0	Ⅳ	1
392	F	29	2022-03-31 11:21:05	IgA	44.6	92	72.72	250(3+)	0.3(1+)	42.53	0.4	143	78	0	0	0	0	Ⅱ	0
393	M	28	2022-03-31 11:20:56	IgA	44.6	88	102.53	250(3+)	-	12.58	0.1	140	70	0	0	0	0	Ⅰ	0
394	F	57	2022-03-28 10:33:06	MCD	17.6	58	98.56	10(+-)	3.0(3+)	6.07	4.03	104	72	0	0	1	0	0	1
395	F	63	2022-03-28 10:32:54	DN	27.4	133	36.68	250(3+)	10(4+)	28.03	8.98	182	87	2 years	6 years	0	0	Ⅲ	0
396	M	32	2022-03-24 10:59:05	LN	26.1	78	113.53	250(3+)	3.0(3+)	57.58	5.98	154	105	4 days	0	0	0	0	1
397	F	47	2022-03-24 10:58:55	LN	34.3	65	97.53	250(3+)	3.0(3+)	394.99	2.36	170	107	First found	0	0	0	0	0
398	F	28	2022-03-24 10:58:42	MPGN	30.1	73	96.87	250(3+)	10(4+)	229.64	2.51	107	67	0	0	0	0	0	0
399	M	71	2022-03-21 10:36:12	MN	24.4	60	96.16	-	3.0（3+）	1	5.99	106	68	2.5 years	0	1	0	0	1
400	M	21	2022-03-17 12:20:18	IgA	42.2	88	107.7	250(3+)	0.3(1+) ↑	37.8	0.65	115	79	0	0	0	0	0	0
401	M	29	2022-03-17 11:56:50	MCD	47.1	81	112.55	-	1.0(2+)	0.2	0.44	134	89	half a year	0	0	0	0	0
402	F	53	2022-03-17 11:54:44	MN	22.7	63	97.11	250(3+)	10(4+)	45.88	5.28	161	87	3 months	0	0	0	0	1
403	M	36	2022-03-17 11:54:24	IgA	39.3	100	83.05	250(3+)	0.15(+-)	27.58	0.25	129	80	0	0	0	0	0	0
404	M	54	2022-03-17 11:52:55	MN	20.2	90	83.13	50(2+)	3.0(3+)	2.52	5.08	133	99	0	0	0	0	0	1
405	F	20	2022-03-17 11:52:17	HSPN	43	59	127.1	20(1+)	0.15(+-)	59.65	0.26	129	77	0	0	0	0	0	0
406	M	75	2022-03-17 11:51:02	Renal Amyloidosis	10.8	52	99.16	10(+-)	10(4+)	2.99	10.93	129	115	0	0	0	0	Ⅰ	1
407	M	70	2022-03-14 12:26:45	FSGS	40.1	137	44.7	250(3+)	3.0(3+)	36.99	4.42	124	84	26 years	0	0	0	0	0
408	F	47	2022-03-14 12:12:44	IgA	39.3	76	80.73	50(2+)	1.0(2+)	9.63	1.45	102	68	0	0	0	0	0	0
409	M	41	2022-03-14 12:11:21	MN	19.4	100	80.18	50(2+)	10(4+)	22.86	12.66	146	100	half a year	0	0	0	0	1
410	M	16	2022-03-14 12:10:14	IgA	18	71	104.789	10(+-)	10(4+)	0.16	12.29	98	71	0	0	0	0	0	1
411	M	32	2022-03-14 12:09:23	MN	27.1	74	116.02	50(2+)	1.0(2+)	11.2	2.41	121	80	0	0	0	0	0	1
412	M	46	2022-03-14 12:08:38	DN	43.6	162	43.2	-	1.0(2+)	0.83	1.29	190	119	3 years	First found	0	0	Ⅲ	0
413	M	31	2022-03-14 12:07:29	IgA	45.8	87	101.79	50(2+)	0.15(+-)	7.38	0.28	129	84	0	0	0	0	0	0
414	F	48	2022-03-10 11:12:25	IgA	42.9	59	104.41	50(2+)	0.3(1+)	10.73	0.55	134	70	1 year	0	0	0	0	0
415	F	34	2022-03-10 11:12:09	MN	19.8	49	122.46	20(1+)	10(4+)	6.53	3.99	100	65	0	0	0	0	0	1
416	M	29	2022-03-10 11:11:23	IgA	41.3	105	82.24	20(1+)	1.0(2+)	24.6	3.05	146	94	half a month	0	0	0	0	0
417	M	68	2022-03-07 12:10:15	MPGN	29.6	228	24.49	250(3+)	3.0(3+)	804.76	6.54	160	104	First found	0	0	1	0	1
418	M	63	2022-03-07 12:10:02	MN	16.8	80	90.37	20(1+)	10(4+)	4.57	9.74	141	101	0	0	0	0	0	1
419	M	46	2022-03-07 12:09:48	MCD	39.1	114	66.07	-	-	0.5	3.05	135	84	0	0	0	0	Ⅱ	0
420	M	66	2022-03-07 12:09:34	MN	19.4	232	24.32	50（2+）	3.0（3+）	7.43	3.9	137	100	2 years	0	0	0	Ⅳ	1
421	F	22	2022-03-07 12:09:18	IgA	42.4	68	110.08	50（2+）	1.0（2+）	10.84	0.57	104	74	0	0	0	0	0	0
422	F	25	2022-03-07 12:08:58	DN	30.2	99	68.45	20（1+）	1.0（2+）	0.59	3.46	159	96	0	6 years	0	1	Ⅱ	1
423	F	35	2022-03-03 11:14:05	IgA	44.3	64	108.12	250（3+）	0.15（+-）	133.67	0.12	122	89	0	0	0	0	0	0
424	M	52	2022-03-03 11:13:54	IgA	21.1	144	47.76	250（3+）	3.0（3+）	92.86	1.67	134	91	1 year	0	0	0	Ⅲ	0
425	M	61	2022-03-03 11:13:44	IgA	35.6	194	31.27	250（3+）	1.0（2+）	56.05	2.76	102	73	0	0	0	0	Ⅲ	1
426	M	53	2022-03-03 11:13:33	DN	23.5	151	44.78	10（+-）	10（4+）	6.5	15.4	157	98	0	20 years	0	0	Ⅲ	1
427	M	67	2022-02-28 11:16:36	MN	22.1	77	89.26	20（1+）	3.0（3+）	9.58	2.15	124	83	0	0	0	0	0	1
428	M	15	2022-02-28 11:11:33	HSPN	40.4	63	119.048	250（3+）	1.0（2+）	17.41	1.49	128	74	0	0	0	0	0	0
429	M	27	2022-02-28 11:11:17	IgA	42.9	84	109.23	20（1+）	0.15（+-）	9.23	0.43	120	83	0	3 years	0	0	0	0
430	M	47	2022-02-28 11:09:33	FSGS	39.3	108	70.04	10（+-）	0.3（1+）	0.11	0.52	120	80	0	0	0	0	0	0
431	F	32	2022-02-28 11:09:23	MN	21.1	96	67.63	10（+-）	10（4+）	35.73	9.28	147	100	0	0	0	0	Ⅱ	1
432	F	48	2022-02-24 11:59:19	LN	32.6	67	93.37	-	-	2.12	0.2	103	67	0	0	0	0	0	0
433	F	35	2022-02-24 11:59:01	LN	25.6	50	121.65	50（2+）	1.0（2+）	23.26	2.02	133	67	0	0	0	0	0	0
434	M	25	2022-02-24 11:37:57	MN	36.3	81	115.75	20（1+）	1.0（2+）	11.95	1.66	136	92	0	0	0	0	0	0
435	M	56	2022-02-24 11:37:45	MN	21.2	76	96.95	20（1+）	3.0（3+）	7.69	1.78	172	113	1 year	0	0	0	0	1
436	M	40	2022-02-24 11:37:32	MN	14	89	92.96	50（2+）	10（4+）	124.9	7.98	118	72	0	0	0	0	Ⅰ	1
437	F	31	2022-02-21 11:03:24	FSGS	36.3	70	99.78	50（2+）	1.0（2+）	27	0.9	110	75	0	0	0	0	0	0
438	F	33	2022-02-21 11:03:11	LN	22.3	123	49.77	50（2+）	3.0（3+）	6.16	5.84	161	112	First found	0	0	0	Ⅲ	1
439	M	76	2022-02-21 11:02:55	IgA	29.7	272	18.7	250（3+）	1.0（2+）	34.63	1.16	98	56	4 years	0	0	1	Ⅳ	1
440	M	70	2022-02-21 11:02:40	MCD	17.4	676	6.49	50（2+）	10（4+）	9.7	6.87	163	67	10 years	0	0	1	0	1
441	M	27	2022-02-17 13:08:46	MCD	18.4	67	125.18	20（1+）	10（4+）	0.65	12.22	109	68	0	0	0	0	0	1
442	F	19	2022-02-17 12:03:15	MN	41	46	138.92	10（+-）	0.3（1+）	1.37	0.96	95	82	0	0	0	0	0	0
443	F	72	2022-02-17 12:02:49	FSGS	29.2	236	17.21	250（3+）	3.0（3+）	5	1.34	182	78	10 years	10 years	0	0	Ⅳ	0
444	F	36	2022-02-17 12:00:39	IgA	32	46	123.28	-	3.0（3+）	0.59	1.3	127	72	2 months	0	0	0	0	0
445	M	39	2022-02-17 12:00:25	Lipoprotein nephropathy	44.2	86	97.58	50（2+）	-	18.94	0.07	116	73	0	0	0	1	0	0
446	F	25	2022-02-14 11:40:05	IgA	43	70	104.08	250（3+）	0.3（1+）	35.68	0.16	94	70	0	0	0	0	0	0
447	F	60	2022-02-14 11:39:50	MN	27.6	64	90.7	20（1+）	1.0（2+）	7.25	2.2	99	58	2 years	0	0	0	0	1
448	M	58	2022-02-14 11:39:38	MN	22.8	120	57.08	50（2+）	10（4+）	2.79	8.54	171	115	First found	0	0	0	Ⅲ	1
449	F	34	2022-02-14 11:39:23	MCD	42.7	77	87.07	-	0.3（1+）	1.75	0.08	110	90	0	0	0	0	0	0
450	M	74	2022-02-14 11:39:09	MN	14.9	105	59.95	-	3.0（3+）	1	6.53	158	122	half a year	0	1	0	Ⅲ	1
451	F	30	2022-02-14 11:38:53	IgA	39.3	74	93.96	250（3+）	1.0（2+）	929.59	0.25	93	64	0	0	0	0	Ⅰ	0
452	M	44	2022-02-14 11:38:39	MCD	11.3	117	64.94	50（2+）	10（4+）	4.46	3.35	92	52	0	0	0	1	Ⅰ	1
453	M	20	2022-02-14 11:38:27	MCD	52.6	116	77.66	-	-	0.09	0.06	142	90	3 years	0	0	0	Ⅱ	0
454	M	61	2022-02-10 11:04:55	ANCA-associated glomerulonephritis	39.3	122	54.78	50（2+）	1.0（2+）	45.34	1.1	178	99	20 years	First found	0	0	Ⅲ	0
455	F	24	2022-02-10 11:04:39	IgA	40.3	80	89.19	250（3+）	1.0（2+）	400.99	0.44	103	88	0	0	0	0	0	0
456	F	23	2022-02-10 11:04:22	IgA	45.8	42	139.18	50（2+）	-	3.67	3.05	111	86	0	0	0	0	0	0
457	M	32	2022-02-07 11:58:16	MN	19.3	172	44.34	50（2+）	5（3+）	5	20.1	127	84	12 years	0	0	0	0	1
458	M	47	2022-02-07 11:58:05	MN	18.4	74	104.42	250（3+）	10（4+）	39.08	1.25	104	77	0	0	0	0	0	1
459	M	44	2022-02-07 11:57:54	FSGS	32.8	192	35.68	50（2+）	1.0（2+）	3.47	2.4	184	113	1 year	0	0	0	Ⅲ	0
460	M	22	2022-02-07 11:57:39	IgA	44.6	99	92.75	50（2+）	0.15（+-）	5	0.14	118	85	0	0	0	0	0	0
461	M	43	2022-02-07 11:57:29	DN	24.1	87	93.56	50（2+）	10（4+）	13.86	3.32	160	102	First found	1 week	0	0	0	1
462	M	16	2022-02-07 11:57:16	MCD	21.8	120	62	20（1+）	10（4+）	13.01	18.43	124	81	0	0	0	0	Ⅱ	1
463	F	26	2022-01-27 11:50:16	IgA	38.6	67	108.97	250（3+）	3.0（3+）	254.14	1.07	110	85	0	0	0	0	0	0
464	F	61	2022-01-27 11:50:00	IgA	28.7	85	63.91	250（3+）	1.0（2+）	130.09	2.42	136	84	0	0	0	0	Ⅱ	0
465	F	56	2022-01-27 11:49:46	MN	25.3	55	101.01	50（2+）	3.0（3+）	19.4	4.46	131	74	3 years	0	0	0	0	1
466	M	44	2022-01-27 11:49:35	MCD	42.2	201	33.76	-	-	0.41	0.07	144	101	First found	0	0	1	0	0
467	M	19	2022-01-27 11:49:25	MCD	15.7	92	103.51	20（1+）	10（4+）	7.72	9.52	120	80	First found	0	0	0	0	1
468	M	55	2022-01-27 11:49:13	MCD	18	111	64.06	20（1+）	10（4+）	4.1	5.32	122	88	0	0	0	1	0	1
469	M	58	2022-01-24 11:45:00	DN	43.5	51	112.63	-	1.0（2+）	0.45	0.68	137	69	7 years	10 years	0	0	0	0
470	F	27	2022-01-24 11:41:20	MCD	44.5	53	125.35	50（2+）	-	11.83	3.05	105	92	First found	0	0	0	0	0
471	M	30	2022-01-24 11:37:45	MCD	13.2	159	49.45	50（2+）	10（4+）	66.83	9.82	124	90	0	0	0	0	Ⅲ	1
472	F	30	2022-01-24 11:17:31	IgA	37.5	78	88.16	50（2+）	3.0（3+）	74.23	1.34	121	89	0	0	0	0	0	0
473	M	56	2022-01-24 11:16:56	IgA	33.6	308	18.52	250（3+）	10（4+）	1673.17	3.05	114	82	0	0	0	0	Ⅳ	0
474	F	30	2022-01-20 12:25:02	IgA	39.9	88	76.2	50（2+）	1.0（2+）	42.41	2.88	133	97	0	0	0	0	Ⅱ	0
475	M	26	2022-01-20 12:24:53	IgA	36.3	94	96.01	250（3+）	3.0（3+）	70.72	1.66	139	79	0	0	0	0	0	0
476	F	32	2022-01-20 12:24:42	MCD	42.3	43	129.64	250（3+）	0.15（+-）	125.03	0.23	104	71	0	0	0	0	0	0
477	F	39	2022-01-20 12:24:33	IgA	41.3	55	113.82	10（+-）	0.3（1+）	18.49	0.23	105	64	0	0	0	0	0	0
478	F	50	2022-01-20 12:24:22	Hypertensive Renal Disease	34.6	76	79.05	20（1+）	1.0（2+）	7.4	1.73	199	98	3 years	0	0	0	Ⅱ	1
479	F	38	2022-01-20 12:24:14	LN	30.2	86	74.06	250（3+）	0.15（+-）	73.78	0.69	118	76	0	0	0	0	0	0
480	M	23	2022-01-20 12:24:04	IgA	41.6	77	121.59	50（2+）	1.0（2+）	21.38	1.75	117	78	0	0	0	0	0	0
481	M	52	2022-01-20 12:23:55	IgA	29.4	85	90.33	10（+-）	3.0（3+）	4.27	0.1	153	84	First found	0	0	0	0	1
482	F	33	2022-01-20 12:23:44	IgA	42.8	73	93.52	250（3+）	0.3（1+）	216.36	0.84	110	80	0	0	0	0	0	0
483	M	21	2022-01-17 12:08:43	IgA	42.2	89	106.24	50（2+）	1.0（2+）	25.25	0.66	124	76	0	0	0	0	0	0
484	F	48	2022-01-17 12:08:14	IgA	36.5	57	105	20（1+）	1.0（2+）	2.68	2.21	128	84	0	0	0	0	0	0
485	M	19	2022-01-17 12:07:51	IgA	46.7	77	125.05	-	0.15（+-）	2.34	0.09	133	87	0	0	0	0	0	0
486	F	38	2022-01-13 12:03:07	MCD	13.3	68	98.38	-	0.3（1+）	0.94	0.07	105	70	0	0	0	0	0	0
487	F	36	2022-01-13 12:02:57	LN	25.3	425	10.88	20（1+）	1.0（2+）	1.42	1.24	125	89	First found	0	0	0	Ⅴ	0
488	F	67	2022-01-13 12:02:43	Renal Amyloidosis	39.3	48	97.78	10（+-）	10（4+）	0.22	3.92	135	71	0	First found	0	0	0	1
489	M	52	2022-01-13 12:02:04	MN	20.7	102	72.46	20（1+）	10（4+）	11.79	6.2	131	75	0	0	0	0	0	1
490	M	61	2022-01-13 12:01:47	Hypertensive Renal Disease	44.7	99	70.52	20（1+）	3.0（3+）	5.69	1.13	130	88	10 years	0	0	0	Ⅱ	0
491	M	60	2022-01-13 12:01:23	ANCA-associated glomerulonephritis	27.6	1362	2.98	250（3+）	1.0（2+）	162.7	1.03	117	86	7 years	0	0	1	0	0
492	M	71	2022-01-13 12:01:10	MCD	20.7	151	39.46	10（+-）	-	2	10.15	109	64	20 years	0	0	0	Ⅲ	1
493	F	51	2022-01-13 11:59:30	DN	26.8	206	23.51	10（+-）	3.0（3+）	0.54	11.51	160	75	2 years	10 years	0	0	Ⅳ	1
494	M	49	2022-01-10 11:02:41	MN	30.5	121	60.2	20（1+）	10（4+）	5.29	7.54	155	84	20 years	0	0	0	Ⅱ	1
495	M	70	2022-01-10 11:02:30	MN	28.1	103	63.11	50（2+）	10（4+）	15.07	7.36	158	97	10 years	0	0	0	Ⅱ	1
496	F	60	2022-01-10 11:00:19	MN	19.9	139	35.51	20（1+）	3.0（3+）	2.2	4.59	187	78	5 years	20 years	0	0	Ⅲ	1
497	M	47	2022-01-06 12:00:52	IgA	39	159	43.88	50（2+）	1.0（2+）	8.24	3.05	140	88	0	0	0	0	Ⅲ	0
498	M	55	2022-01-06 12:00:40	DN	27.2	198	31.82	10（+-）	3.0（3+）	7.22	10.47	182	81	1 year	10 years	0	0	Ⅳ	1
499	M	63	2022-01-06 11:59:54	MN	18.4	105	64.77	50（2+）	10（4+）	9.13	7.84	124	71	0	0	0	0	Ⅱ	1
500	M	35	2022-01-06 11:59:43	MN	37.6	83	104.77	20（1+）	0.3（1+）	10.22	0.57	118	84	0	0	0	0	0	0
501	M	50	2022-01-06 11:59:30	MN	32	184	36.01	20（1+）	10（4+）	5.38	8.88	183	97	1 year	0	0	0	Ⅲ	1
502	M	71	2021-12-30 12:13:44	MCD	16	100	64.95	10（+-）	10（4+）	1.75	8.43	125	89	half a month	0	0	1	0	1
503	M	42	2021-12-30 12:13:33	MN	27.1	97	82.61	10（+-）	10（4+）	10.89	6	174	125	First found	0	0	0	0	1
504	M	35	2021-12-30 12:13:21	HSPN	46.8	68	117.62	20（1+）	0.3（1+）	2.66	0.36	130	80	0	0	0	0	0	0
505	M	27	2021-12-30 12:13:11	IgA	43.9	101	87.41	50（2+）	0.3（1+）	38.2	0.11	166	103	0	0	0	0	0	0
506	M	34	2021-12-30 12:12:49	IgA	37.5	106	60	20（1+）	1.0（2+）	12.37	1.42	130	95	1 year	0	0	0	0	0
507	M	64	2021-12-30 12:12:25	DN	29	134	47.89	10（+-）	1.0（2+）	0.74	3.84	84	43	8 years	10 years	0	0	Ⅲ	1
508	F	29	2021-12-30 12:12:06	MCD	20.8	57	120.68	10（+-）	3.0（3+）	5.27	1.85	108	69	0	0	0	0	Ⅰ	1
509	M	43	2021-12-27 11:22:09	Hypertensive Renal Disease	45.2	130	57.57	-	0.3（1+）	0.47	0.76	167	107	1 month	0	0	0	0	0
510	F	48	2021-12-27 11:21:58	IgA	35.1	56	106.22	50（2+）	1.0（2+）	4.45	3.05	146	115	3 years	3 years	0	0	Ⅰ	0
511	M	21	2021-12-27 11:21:48	Hypertensive Renal Disease	35.1	1557	3.34	250（3+）	3.0（3+）	29.93	2.63	154	88	2 weeks	0	0	0	Ⅴ	0
512	F	58	2021-12-23 11:57:28	LN	28.2	97	55.25	-	0.3（1+）	0.31	3.05	139	84	1 year	0	0	0	Ⅲ	0
513	M	59	2021-12-23 11:49:37	Crescentic glomerulonephritis	29	229	25.95	20（1+）	3.0（3+）	7.45	5.75	133	81	First found	0	0	0	Ⅳ	1
514	M	34	2021-12-23 11:48:42	IgA	16.8	142	55.12	20（1+）	10（4+）	7.96	9.86	118	93	0	0	0	0	Ⅲ	1
515	M	50	2021-12-23 11:48:31	MN	23.6	93	82.17	50（2+）	10（4+）	17.84	3.94	117	90	0	0	0	0	0	1
516	M	58	2021-12-23 11:48:22	MN	18.2	86	85.39	50（2+）	1.0（2+）	5	8.93	107	79	0	0	0	0	0	1
517	M	56	2021-12-23 11:48:10	MN	24.7	74	98.02	-	1.0（2+）	2.34	0.68	125	92	0	0	0	0	0	0
518	F	43	2021-12-23 11:47:37	IgA	36.9	90	67.68	250（3+）	0.3（1+）	26.53	3.05	111	72	0	0	0	0	Ⅱ	0
519	M	27	2021-12-20 10:41:04	MN	39.9	116	73.94	-	3.0（3+）	0.65	1.68	116	78	0	0	0	0	Ⅱ	0
520	F	33	2021-12-20 10:40:52	MN	35.4	54	119.44	-	0.15（+-）	1.39	0.78	133	76	0	0	0	0	0	0
521	M	28	2021-12-16 12:03:16	IgA	41	105	82.82	250（3+）	0.3（1+）	65.07	0.4	114	74	0	0	0	0	Ⅱ	0
522	M	17	2021-12-16 12:03:01	IgA	42.9	48	153.75	-	0.15（+-）	0.09	3.05	130	84	0	0	0	0	0	1
523	M	59	2021-12-16 12:02:51	MN	21.7	85	86	10（+-）	10（4+）	2.39	36	116	85	0	0	0	0	0	1
524	M	29	2021-12-16 12:02:41	IgA	46.5	74	118.49	10（+-）	0.3（1+）	1.3	0.48	114	75	0	0	0	0	0	0
525	M	54	2021-12-16 12:02:25	MN	32	90.5	82.57	10（+-）	3.0（3+）	2.34	0.93	149	98	First found	0	0	0	Ⅱ	1
526	M	61	2021-12-16 12:02:16	DN	31.2	336	16.1	10（+-）	3.0（3+）	2.74	8.97	141	75	20 years	20 years	0	0	Ⅳ	0
527	F	58	2021-12-13 12:28:36	MN	15.8	88	62.59	250（3+）	10（4+）	38.81	5.82	143	83	0	0	0	0	Ⅱ	1
528	F	43	2021-12-13 12:28:23	MCD	22.2	49	114.95	10（+-）	10（4+）	3.26	3.2	106	71	0	0	0	0	0	1
529	M	26	2021-12-13 12:28:07	IgA	39.4	109	80.28	50（2+）	3.0（3+）	12.55	0.41	132	110	1 month	0	0	0	Ⅱ	0
530	M	62	2021-12-13 12:27:52	DN	32.5	162	38.61	50（2+）	3.0（3+）	3.55	3.16	120	79	10 years	20 years	0	1	Ⅱ	0
531	F	44	2021-12-09 10:54:25	LN	28.8	52.6	111.52	50（2+）	0.15（+-）	10.69	0.42	162	100	First found	4 years	0	0	0	0
532	M	43	2021-12-09 10:41:45	MN	16.4	71	109.23	50（2+）	3.0（3+）	2.88	7.65	142	88	0	0	0	0	Ⅰ	1
533	M	33	2021-12-09 10:41:32	MN	28.6	98	86.91	20（1+）	3.0（3+）	6.19	5.41	141	94	First found	0	0	0	0	1
534	F	32	2021-12-02 12:11:20	LN	23.4	81	83.05	250（3+）	3.0（3+）	18.99	5.72	122	60	0	0	0	1	0	1
535	M	36	2021-12-02 12:08:50	DN	41.5	118	67.99	-	1.0（2+）	0.23	3.05	122	78	0	1 year	0	0	Ⅱ	0
536	M	50	2021-12-02 12:08:24	LN	26.5	104	71.78	50（2+）	1.0（2+）	11.3	3.09	170	105	3 years	0	0	0	Ⅱ	0
537	M	33	2021-12-02 12:08:02	MCD	44.3	72	116.51	-	3.0（3+）	1.6	1.14	127	72	0	0	0	0	Ⅰ	0
538	F	27	2021-11-29 11:22:28	FSGS	37.3	219	25.85	250（3+）	1.0（2+）	10.8	0.78	142	89	3 months	0	0	0	Ⅲ	0
539	F	34	2021-11-29 11:22:07	MCD	17.5	64	108.88	-	0.15（+-）	0.7	0.55	116	71	0	0	0	0	0	1
540	M	37	2021-11-25 11:03:15	IgA	38.3	107	75.99	-	1.0（2+）	2.14	1.77	168	104	7 months	7 months	0	0	Ⅱ	0
541	F	52	2021-11-25 11:02:58	MCD	37.3	54	104.52	250（3+）	10（4+）	56.43	3.62	131	67	15 years	10 years	1	0	0	1
542	M	57	2021-11-25 11:02:42	DN	34.6	115	60.52	-	3.0（3+）	0.68	2.44	201	130	7 years	10 years	0	0	Ⅱ	0
543	F	79	2021-11-22 11:39:16	MPGN	19.5	60	83.51	10（+-）	10（4+）	3.73	15.29	168	86	6 years	0	0	0	0	1
544	F	25	2021-11-18 10:32:41	MCD	17.4	44.6	134.55	10（+-）	10（4+）	7.65	4.91	113	75	0	0	0	1	0	1
545	F	25	2021-11-15 12:11:08	IgA	41.7	55.9	124.92	250（3+）	0.3（1+）	46.22	0.13	114	76	0	0	0	0	0	0
546	M	25	2021-11-15 12:10:51	MCD	46.4	134	62.98	-	0.15（+-）	0.16	0.23	117	84	0	0	0	0	Ⅲ	0
547	M	19	2021-11-15 12:10:37	MCD	17.3	71.7	128.77	10（+-）	10（4+）	0.45	8.98	114	81	0	0	0	0	0	1
548	F	14	2021-11-15 12:10:23	IgA	17.9	53.9	140.26	-	10（4+）	2.07	2.67	122	81	0	0	0	0	0	1
549	F	27	2021-11-15 12:10:11	LN	20	48	129.5	250（3+）	10（4+）	89.28	3.05	131	86	0	0	0	0	0	1
550	F	70	2021-11-15 12:09:58	MN	21	193.7	22.16	50（2+）	10（4+）	23.36	5.74	143	91	20 years	0	0	0	Ⅳ	1
551	M	62	2021-11-15 12:09:18	MN	29.8	61.7	101.26	20（1+）	1.0（2+）	7.69	0.48	117	77	0	0	0	0	0	1
552	F	48	2021-11-15 11:06:14	MCD	45.1	99.3	58.02	20（1+）	1.0（2+）	1.94	1.41	151	81	1 week	0	0	0	Ⅲ	0
553	M	32	2021-11-11 11:19:54	IgA	51.6	71.5	117.67	20（1+）	0.3（1+）	2.32	3.05	130	90	2 years	0	0	0	0	0
554	F	46	2021-11-11 11:19:42	MCD	35.3	44.4	116.27	20（1+）	-	21.19	0.08	120	63	0	0	0	0	0	0
555	F	27	2021-11-11 11:19:27	IgA	47.1	46.1	131.24	20（1+）	-	2.54	0.11	139	101	1 year	0	0	0	0	0
556	F	58	2021-11-11 11:19:13	MCD	23.4	87.5	63.03	20（1+）	10（4+）	1.21	6.72	156	78	1 year	0	0	0	Ⅱ	1
557	M	22	2021-11-11 10:24:31	LN	33.9	98	93.9	250（3+）	3.0（3+）	73.6	6.06	127	80	The course of disease is unknown	0	0	0	Ⅰ	0
558	F	49	2021-11-08 10:54:02	MN	24.5	46.2	112.36	20（1+）	3.0（3+）	14.02	5.34	115	76	2 months	0	0	0	Ⅰ	1
559	F	44	2021-11-08 10:53:47	LN	28.1	79.8	77.73	-	0.3（1+）	0.74	1.17	130	89	0	0	0	0	Ⅱ	0
560	M	59	2021-11-08 10:53:33	MN	29.9	90	80.26	10（+-）	10（4+）	9.32	3.05	120	79	The course of disease is unknown	The course of disease is unknown	0	0	Ⅱ	1
561	F	49	2021-11-04 11:28:18	IgA	34.7	76.9	78.48	250（3+）	1.0（2+）	45.22	3.05	125	87	3 years	0	0	1	0	0
562	F	29	2021-11-04 11:28:03	IgA	31.6	101.5	64.57	250（3+）	3.0（3+）	15.93	2.4	137	104	3 months	0	0	0	Ⅱ	0
563	M	68	2021-11-04 11:27:47	MN	19.1	66.5	94.14	250（3+）	10（4+）	76.19	5.04	177	93	First found	0	0	0	0	1
564	F	62	2021-11-04 11:27:29	ANCA-associated glomerulonephritis	31.5	377.8	10.45	250（3+）	1.0（2+）	25.34	2.95	113	64	2 months	0	0	0	Ⅴ	0
565	F	18	2021-11-04 10:33:31	LN	32.5	50.2	145.817	-	0.3（1+）	2.65	3.05	120	87	0	0	0	0	0	0
566	F	22	2021-11-01 12:06:14	LN	31.9	53.3	129.59	250（3+）	0.3（1+）	41.6	0.57	115	75	0	0	0	0	0	0
567	M	55	2021-11-01 11:37:19	MN	20.4	54.3	112.1	50（2+）	3.0（3+）	10.8	6.38	200	113	First found	0	0	0	0	1
568	M	66	2021-11-01 11:26:28	Lipoprotein nephropathy	22.8	98.2	68.76	50（2+）	10（4+）	14.9	6.52	151	85	10 years	10 years	1	0	Ⅱ	1
569	M	73	2021-11-01 11:26:08	Thrombotic microangiopathy	23.2	99.9	64.12	50（2+）	10（4+）	34.43	7.75	131	96	8 months	0	1	0	Ⅱ	1
570	F	34	2021-10-28 10:44:18	IgA	38.8	47.6	123.63	20（1+）	1.0（2+）	14.47	0.75	90	68	0	0	0	0	0	0
571	M	39	2021-10-28 10:44:01	IgA	35	185	38.58	250（3+）	3.0（3+）	14.8	1.91	145	105	3 years	0	0	0	Ⅲ	0
572	M	42	2021-10-28 10:43:32	DN	32.2	68.8	111.44	20（1+）	3.0（3+）	6.14	3.83	160	98	First found	8 years	0	0	0	0
573	F	28	2021-10-28 10:43:11	IgA	41.1	53.6	124.01	-	0.15（+-）	0.54	3.05	101	81	0	0	0	0	0	0
574	M	47	2021-10-25 11:15:50	FSGS	46.5	88	89.72	-	3.0（3+）	0.47	3.29	165	113	1 year	0	1	0	0	0
575	F	52	2021-10-25 11:15:37	DN	34.8	408.2	10.21	50（2+）	1.0（2+）	4.61	1.6	187	84	6 years	6 years	0	0	Ⅴ	0
576	M	59	2021-10-25 11:15:23	DN	24.4	71	97.62	50（2+）	3.0（3+）	5.31	3.8	150	75	1 year	10 years	0	0	0	1
577	M	40	2021-10-21 11:08:54	IgA	40.9	123	62.87	250（3+）	10（4+）	86.67	1.02	110	70	0	0	0	0	Ⅲ	0
578	M	77	2021-10-21 11:08:44	MCD	21.8	194	27.94	50（2+）	3.0（3+）	2.07	6.45	162	98	0	10 years	0	1	0	1
579	M	58	2021-10-21 11:08:31	Hypertensive Renal Disease	45.3	132.2	50.77	-	0.15（+-）	0.16	0.19	118	88	1 year	0	0	0	Ⅲ	0
580	F	48	2021-10-21 11:08:14	MN	31.3	37.9	120.77	250（3+）	1.0（2+）	11.63	3.05	128	84	0	0	0	0	0	0
581	M	51	2021-10-18 10:34:06	IgA	51.2	82	95.01	250（3+）	1.0（2+）	14.38	1.39	109	81	0	0	0	0	0	0
582	M	42	2021-10-14 11:47:55	MPGN	40.1	110.7	70.41	20（1+）	0.3（1+）	7.7	3.05	123	82	5 months	0	0	0	Ⅱ	0
583	F	26	2021-10-14 11:47:41	IgA	39.2	41.4	136.92	50（2+）	1.0（2+）	5.89	1.01	104	82	0	0	0	0	0	0
584	M	17	2021-10-14 11:47:27	MN	33.8	97.1	76.0041	250（3+）	10（4+）	41.62	4.6	136	98	0	0	0	0	0	1
585	F	34	2021-10-14 10:52:57	IgA	38.6	43.3	127.54	250（3+）	1.0（2+）	108.43	3.05	117	88	0	0	0	0	0	0
586	F	72	2021-10-14 10:52:40	Renal Amyloidosis	32.2	74.3	69.61	20（1+）	3.0（3+）	4.23	3.68	143	63	10 years	0	0	0	Ⅱ	0
587	M	69	2021-10-11 10:38:29	Renal lesion associated with malignant tumor	18.6	132.4	46.91	20（1+）	3.0（3+）	2.66	5.36	117	78	10 years	10 years	1	0	Ⅲ	1
588	F	34	2021-10-11 10:38:07	LN	33.4	44.7	126.21	250（3+）	0.15（+-）	2.7	0.24	140	96	0	0	0	0	0	0
589	F	65	2021-10-11 10:37:50	MN	24.9	68.6	80.53	50（2+）	10（4+）	4.34	4.27	123	63	10 years	0	0	0	0	1
590	F	58	2021-10-08 09:47:20	MCD	23.2	267	16.31	20（1+）	10（4+）	6.01	7.04	131	84	0	0	0	1	0	1
591	F	41	2021-09-27 11:51:32	LN	21.6	39	125.67	10（+-）	10（4+）	5.4	1.89	121	73	First found	0	0	0	0	0
592	M	18	2021-09-27 11:07:55	IgA	42	60.4	121.192	250（3+）	3.0（3+）	133.02	0.81	125	78	0	0	0	0	0	0
593	F	35	2021-09-27 11:07:13	IgA	41.4	75.7	88.26	-	1.0（2+）	0.58	0.97	95	62	0	0	0	0	Ⅱ	0
594	F	44	2021-09-27 11:07:03	MN	35.6	46.3	116.3	250（3+）	1.0（2+）	80.19	3.05	120	76	0	0	0	0	Ⅰ	0
595	M	25	2021-09-27 11:06:53	MCD	44.9	96.3	93.9	-	0.15（+-）	0.09	0.13	119	79	0	0	0	0	Ⅰ	0
596	F	33	2021-09-27 11:06:42	MN	23.1	41.9	129.84	10（+-）	1.0（2+）	0.07	1.52	118	77	0	0	0	0	0	1
597	F	55	2021-09-23 16:50:42	LN	19	45.8	108.04	20（1+）	1.0（2+）	8.23	1.89	99	60	0	0	1	0	Ⅰ	0
598	F	33	2021-09-23 15:39:42	IgA	39.9	65.7	106.23	250（3+）	0.3（1+）	32.36	0.23	100	77	0	0	0	0	0	0
599	M	74	2021-09-23 15:39:26	MN	23	83	79.66	10（+-）	10（4+）	2.41	3.36	149	84	0	8 years	0	0	Ⅱ	1
600	M	47	2021-09-16 11:41:12	Lipoprotein nephropathy	23.4	75.3	103.67	10（+-）	3.0（3+）	3.24	12.94	127	95	4 months	0	0	0	0	1
601	F	52	2021-09-16 11:38:35	IgA	38.3	83.8	69.26	250（3+）	1.0（2+）	16.27	1.26	109	69	4 years	0	0	0	Ⅱ	0
602	F	27	2021-09-16 11:38:17	IgA	45.6	62.4	117.92	250（3+）	1.0（2+）	31.12	3.05	119	79	0	0	0	0	Ⅰ	0
603	M	28	2021-09-16 11:37:08	IgA	41.7	111.3	77.18	250（3+）	1.0（2+）	11.47	2.06	130	85	1 month	0	0	0	Ⅱ	0
604	F	34	2021-09-16 11:36:57	LN	25.4	49.6	121.97	20（1+）	10（4+）	4.7	6.42	112	80	0	0	0	0	0	1
605	F	54	2021-09-16 11:36:47	IgA	39.7	103	53.22	50（2+）	1.0（2+）	6.37	1.58	154	78	10 years	0	0	0	Ⅲ	0
606	M	25	2021-09-13 11:00:20	IgA	47.9	63.1	130.11	10（+-）	-	4.5	0.17	120	80	0	0	0	0	Ⅰ	0
607	M	74	2021-09-13 10:52:15	MN	21.5	212.9	25.51	-	0.3（1+）	0.16	0.27	111	68	3 years	0	0	1	Ⅱ	0
608	F	47	2021-09-09 11:48:06	Lipoprotein nephropathy	27	96.6	60.41	10（+-）	3.0（3+）	1.22	7.64	168	106	1 month	0	0	0	Ⅲ	1
609	F	76	2021-09-09 11:47:54	MCD	20.1	113.8	40.42	20（1+）	10（4+）	8.82	7.55	152	77	7 years	0	0	0	Ⅲ	1
610	M	63	2021-09-09 11:47:41	Renal Amyloidosis	16.7	111.2	60.43	20（1+）	3.0（3+）	5.27	2.18	149	104	2 years	0	1	0	Ⅱ	0
611	M	36	2021-09-09 11:47:02	HSPN	41.3	78.6	110.04	-	1.0（2+）	2.34	1.59	125	99	0	0	0	0	0	0
612	M	39	2021-09-09 11:45:42	IgA	36.5	84.3	99.97	250（3+）	1.0（2+）	20.32	1.59	129	86	0	0	0	0	Ⅰ	0
613	M	24	2021-09-09 11:45:31	HSPN	45.2	64.7	129.69	20（1+）	0.3（1+）	8.86	0.14	120	77	0	0	0	0	0	0
614	M	58	2021-09-09 11:45:14	IgA	36.9	109.2	63.97	250（3+）	0.3（1+）	20.57	0.6	106	81	0	0	0	0	Ⅱ	0
615	F	17	2021-09-06 16:17:40	LN	44.2	49	150.612	250（3+）	0.15（+-）	21.47	0.12	123	78	0	0	0	0	0	0
616	M	18	2021-09-06 11:13:32	MCD	46.1	68.5	106.861	10（+-）	0.3（1+）	0.47	0.19	104	60	0	20 days	0	0	0	0
617	M	23	2021-09-06 11:13:20	MCD	41.1	66.1	129.46	20（1+）	1.0（2+）	0.16	0.39	99	63	0	0	0	0	Ⅰ	0
618	F	57	2021-09-06 11:13:07	MN	30.9	63	94.42	20（1+）	1.0（2+）	10.37	1.67	134	92	First found	0	0	0	0	1
619	M	62	2021-09-02 11:17:06	MN	22.8	65.7	98.68	20（1+）	1.0（2+）	1.85	1.08	220	123	First found	0	0	0	0	1
620	M	37	2021-09-02 11:16:49	DN	28.4	352.4	17.99	250（3+）	3.0（3+）	127.17	9.01	147	81	half a year	half a year	0	0	Ⅴ	1
621	F	62	2021-09-02 11:16:27	DN	37.9	68.6	82.24	10（+-）	1.0（2+）	2.48	0.94	112	61	10 years	10 years	0	0	Ⅱ	0
622	M	36	2021-08-27 16:42:37	LN	20.6	67.2	118.19	-	3.0（3+）	2.34	7.01	151	93	First found	0	0	0	0	1
623	F	34	2021-08-27 16:42:24	LN	36.3	45.5	125.48	-	0.3（1+）	1.15	0.36	120	74	0	0	0	0	0	0
624	M	59	2021-08-26 11:47:05	IgA	38.3	69.8	98.31	50（2+）	3.0（3+）	7.09	1.06	115	86	0	0	0	0	0	0
625	M	61	2021-08-26 11:46:55	MN	19.9	90	79.14	250（3+）	10（4+）	161.46	21.24	160	104	1 year	0	0	0	Ⅱ	1
626	M	31	2021-08-26 11:46:45	MN	19.9	54.9	132.09	20（1+）	3.0（3+）	14.17	2.75	112	82	0	0	0	0	0	1
627	M	33	2021-08-26 11:46:35	MCD	42.5	102	82.81	20（1+）	1.0（2+）	2.47	0.23	139	90	2 years	0	0	0	Ⅱ	0
628	M	58	2021-08-26 11:46:21	MN	33.9	61.9	104.01	20（1+）	10（4+）	2.66	3.05	111	74	3 years	1 year	0	0	0	1
629	M	18	2021-08-26 11:46:03	MCD	16.4	96	76.25	20（1+）	10（4+）	4.95	8.11	101	80	0	0	0	0	0	1
630	F	24	2021-08-23 11:09:17	LN	23.6	141.9	44.6	250（3+）	3.0（3+）	37.78	0.55	125	88	0	0	0	1	0	0
631	F	67	2021-08-23 11:08:51	Crescentic glomerulonephritis	31.1	142.8	32.73	250（3+）	3.0（3+）	438.34	1.81	117	75	half a year	0	0	0	Ⅲ	0
632	M	18	2021-08-23 11:08:41	MsPGN	17.8	94.8	77.2152	250（3+）	10（4+）	10.58	18.35	140	80	First found	0	0	0	0	1
633	M	61	2021-08-23 11:08:20	IgA	28.3	134.6	48.65	250（3+）	0.3（1+）	44.93	0.18	86	62	0	0	0	0	0	0
634	M	67	2021-08-19 12:07:15	IgA	41.2	109.5	59.86	50（2+）	0.3（1+）	35.87	1.18	125	73	3 years	3 years	0	0	Ⅲ	0
635	F	67	2021-08-19 12:07:00	TIN	38	86.8	59.74	-	-	0.79	0.39	110	59	First found	0	0	1	0	0
636	M	14	2021-08-19 12:06:46	TIN	45.6	132.2	57.1861	-	0.3（1+）	0.2	0.4	110	65	0	0	0	0	Ⅲ	0
637	F	31	2021-08-19 12:06:32	HSPN	40.9	56	119.69	250（3+）	1.0（2+）	84.92	0.51	102	66	0	0	0	0	0	0
638	M	66	2021-08-19 12:06:16	IgA	20.5	179	33.25	250（3+）	3.0（3+）	528.44	5.31	143	95	First found	10 years	0	1	0	1
639	F	65	2021-08-19 12:06:02	MN	25.7	70.9	77.38	20（1+）	3.0（3+）	12.4	3.59	132	90	0	0	0	0	0	1
640	M	40	2021-08-19 12:05:46	IgA	42.6	83.8	99.98	50（2+）	0.15（+-）	5.6	0.47	130	69	2 years	0	0	0	Ⅱ	0
641	F	65	2021-08-16 11:18:29	MN	33.7	47.2	99.71	50（2+）	1.0（2+）	13.9	0.86	125	80	The course of disease is unknown	0	0	0	0	0
642	M	26	2021-08-16 11:18:18	IgA	43.7	82.1	113.08	50（2+）	1.0（2+）	21.15	0.73	130	82	0	0	0	0	0	0
643	M	35	2021-08-16 11:18:07	MCD	41	103.1	80.6	-	-	0	0.16	114	76	0	0	0	0	Ⅱ	0
644	M	53	2021-08-16 11:17:54	DN	22.8	96.4	77.04	-	10（4+）	2.34	5.16	151	78	half a month	10 years	0	0	0	1
645	F	32	2021-08-16 11:17:05	IgM	36.5	39.9	132.87	-	3.0（3+）	0.65	3	101	66	0	0	0	0	0	0
646	M	24	2021-08-12 11:45:21	IgA	48	78.9	119.53	250（3+）	1.0（2+）	182.61	0.76	124	73	0	0	0	0	0	0
647	F	34	2021-08-12 11:44:11	IgA	40	57.7	116.05	250（3+）	10（4+）	12.31	3.05	147	109	First found	0	0	0	0	0
648	M	55	2021-08-12 11:43:11	FSGS	36.8	83.6	90.24	-	1.0（2+）	0.38	0.8	134	95	0	0	0	0	Ⅰ	0
649	M	27	2021-08-12 11:42:33	MCD	23	65.9	126.03	-	10（4+）	1.04	8.48	126	90	0	0	0	0	0	1
650	M	24	2021-08-09 12:03:01	IgA	44.1	81.2	116.22	250（3+）	1.0（2+）	4.41	0.33	122	80	0	0	0	0	0	0
651	M	41	2021-08-09 12:02:40	Hypertensive Renal Disease	46.3	87.5	94.23	-	0.3（1+）	1.03	0.5	171	108	2 months	9 days	0	0	0	0
652	F	40	2021-08-09 12:02:19	Lipoprotein nephropathy	35.7	91.2	68.03	20（1+）	0.3（1+）	1.8	0.45	110	80	0	0	0	0	Ⅱ	0
653	M	28	2021-08-09 12:02:00	FSGS	39.8	88.5	101.83	-	0.3（1+）	1.33	0.47	127	93	0	0	0	0	0	0
654	M	69	2021-08-05 11:46:53	IgG4	36.5	421.7	11.56	20（1+）	1.0（2+）	0.29	0.69	93	61	0	2 years	0	0	Ⅳ	0
655	M	41	2021-08-05 11:44:53	FSGS	40.7	158.7	45.88	-	1.0（2+）	1.35	3.05	124	68	0	0	0	0	Ⅲ	0
656	M	71	2021-08-05 11:44:12	DN	29.5	509.7	9.07	10（+-）	3.0（3+）	0.23	6.09	188	74	10 years	First found	0	0	Ⅴ	1
657	F	33	2021-08-05 11:44:02	IgA	32.8	56.6	117.61	250（3+）	1.0（2+）	246.67	0.99	105	75	0	0	0	0	0	0
658	M	42	2021-08-05 11:43:51	IgA	39.3	69.4	111.04	50（2+）	0.15（+-）	10.89	0.57	134	86	0	2 months	0	0	0	0
659	M	38	2021-08-05 11:43:41	IgA	38.2	119.8	65.82	250（3+）	1.0（2+）	85.7	0.99	135	86	0	0	0	0	Ⅱ	0
660	M	58	2021-08-05 11:43:31	MN	20.1	65.1	101.88	50（2+）	10（4+）	8.71	3.05	120	90	6 years	0	0	0	0	1
661	F	28	2021-08-02 11:12:52	IgA	37.5	58.2	120.7	20（1+）	0.3（1+）	6.86	0.65	128	88	0	0	0	0	0	0
662	M	74	2021-08-02 11:12:35	DN	24	84.4	78.06	20（1+）	3.0（3+）	4.25	4.61	140	79	12 years	20 years	0	0	0	1
663	F	32	2021-07-29 11:11:32	IgA	32.5	71.8	96.09	250（3+）	3.0（3+）	468.59	1.5	106	60	0	0	0	0	0	0
664	F	73	2021-07-29 11:11:08	MCD	26.9	73.6	69.92	-	10（4+）	0.86	5.22	117	69	7 years	0	0	0	Ⅱ	1
665	M	63	2021-07-29 11:10:47	MN	32.3	62	100.35	10（+-）	10（4+）	5.47	6.52	153	96	0	0	0	0	0	1
666	M	30	2021-07-29 11:10:31	IgA	40.6	128.4	64.03	-	1.0（2+）	0.77	0.43	124	72	0	0	0	0	Ⅱ	0
667	F	55	2021-07-26 11:32:14	MN	26.4	40.4	112.59	20（1+）	3.0（3+）	4.1	11.18	145	89	0	0	0	0	0	1
668	M	16	2021-07-26 11:31:58	IgA	37.3	96.8	76.8595	250（3+）	1.0（2+）	337.77	0.86	134	84	0	0	0	0	0	0
669	M	41	2021-07-22 11:35:37	IgA	36.9	70.3	111.23	50（2+）	0.3（1+）	6.39	0.29	107	60	0	0	0	0	0	0
670	M	50	2021-07-22 11:35:26	IgM	38.3	134.9	52.41	-	0.15（+-）	0.27	3.05	126	76	5 years	0	0	0	Ⅲ	0
671	M	53	2021-07-22 11:35:14	DN	34.9	135.6	51	50（2+）	3.0（3+）	7.74	3.12	179	101	1 year	6 years	0	0	Ⅲ	0
672	M	38	2021-07-21 17:24:00	FSGS	31.9	359.2	17.45	20（1+）	1.0（2+）	18.32	2.07	103	67	0	0	0	0	Ⅳ	0
673	F	78	2021-07-19 12:53:32	MN	21.3	58	85.05	10（+-）	3.0（3+）	2.27	3.89	144	82	2 years	0	0	0	0	1
674	M	35	2021-07-19 12:53:14	IgA	45	94.9	89.1	-	0.15（+-）	0.13	0.35	183	132	1 year	0	0	0	Ⅱ	0
675	M	75	2021-07-19 12:53:03	MCD	17.2	97.8	64.87	10（+-）	1.0（2+）	1.03	4.03	104	62	2 years	0	0	0	Ⅱ	1
676	M	61	2021-07-19 12:52:52	MCD	22.3	75	94.11	-	1.0（2+）	0.14	1.93	103	71	0	0	0	0	0	1
677	F	36	2021-07-19 12:52:41	MN	25.8	49.3	120.51	-	1.0（2+）	1.01	4.73	98	79	0	0	0	0	0	1
678	M	43	2021-07-19 12:52:29	MN	32.5	66.8	112.01	50（2+）	1.0（2+）	9.52	3.13	119	77	0	0	0	0	0	0
679	M	60	2021-07-19 12:52:17	DN	36.4	375.4	14.18	-	3.0（3+）	1.08	4.69	93	57	10 years	20 years	0	0	Ⅴ	0
680	M	35	2021-07-15 12:27:31	IgA	38.1	118.1	68.4	10（+-）	0.3（1+）	4.16	0.46	128	81	0	0	0	0	Ⅲ	0
681	F	54	2021-07-15 12:27:14	MN	21.7	65	92.85	250（3+）	10（4+）	28	3.05	130	87	9 months	0	0	0	0	1
682	F	70	2021-07-15 12:25:16	DN	18.7	82.3	62.38	50（2+）	10（4+）	14.35	9.1	152	85	1 year	10 years	0	0	Ⅱ	1
683	F	58	2021-07-15 12:23:51	MN	24.9	46.8	105.03	10（+-）	10（4+）	9	8.46	131	90	0	First found	0	0	0	1
684	F	42	2021-07-15 12:23:34	MN	34.8	46.3	117.94	50（2+）	1.0（2+）	9.59	0.19	109	77	0	0	0	0	0	1
685	M	64	2021-07-12 11:45:55	DN	24	466.3	10.6	50（2+）	3.0（3+）	4.16	4.2	111	51	9 years	9 years	0	0	Ⅴ	1
686	F	23	2021-07-12 11:45:42	MCD	20.7	51.6	130.06	250（3+）	10（4+）	88.63	7.82	128	107	First found	0	0	0	0	1
687	F	27	2021-07-12 11:45:25	IgA	35.9	53.5	124.96	50（2+）	1.0（2+）	23	0.29	124	72	0	0	0	0	0	0
688	M	36	2021-07-12 11:44:40	IgA	39.6	86.6	98.83	50（2+）	0.3（1+）	6.59	0.64	120	86	0	0	0	0	0	0
689	F	27	2021-07-12 11:43:17	IgA	37.1	56.5	122.74	10（+-）	3.0（3+）	13.95	1.71	130	77	0	0	0	0	0	0
690	F	17	2021-07-08 14:05:31	HSPN	40.1	51.4	143.58	50（2+）	0.3（1+）	5.38	0.28	131	81	0	0	0	0	0	0
691	M	73	2021-07-08 14:05:17	MN	36.5	71	88.48	20（1+）	10（4+）	15.79	1.9	121	84	4 months	0	0	0	0	1
692	F	27	2021-07-08 14:05:00	IgA	37.2	65	112.24	250（3+）	1.0（2+）	104.49	1.04	104	70	0	0	0	1	0	0
693	M	71	2021-07-08 12:28:20	MN	33.8	63.3	94.06	10（+-）	0.3（1+）	1.93	1.67	134	78	2 years	0	0	0	0	1
694	M	54	2021-07-08 12:27:06	IgA	20.4	79.2	96.67	-	10（4+）	1.58	3.45	146	100	0	0	0	0	0	1
695	F	77	2021-07-05 11:47:47	FSGS	29.8	87.5	55.15	20（1+）	3.0（3+）	7.54	7.23	176	110	1 year	0	1	0	Ⅲ	1
696	M	53	2021-07-05 11:47:32	MN	38.2	75.9	99.07	-	1.0(2+)	13	6.07	147	80	10 years	0	0	0	0	0
697	M	63	2021-07-05 11:47:17	MN	17.7	102.7	66.52	50(2+)	10(4+)	37.08	14.5	156	105	40 years	0	0	0	Ⅳ	1
698	M	50	2021-07-05 11:46:52	MN	36.3	74.3	102.07	-	0.15(+-)	2.34	0.22	103	54	0	0	0	0	0	1
699	F	52	2021-07-05 11:45:39	DN	31.2	194.6	25.01	50(2+)	0.3(1+)	1.76	0.78	133	74	0	1 month	0	1	0	0
700	M	44	2021-07-05 11:45:22	MN	33.2	53	122.32	-	1.0(2+)	2.34	1.78	130	78	1 year	0	0	0	0	0
701	F	42	2021-07-01 11:25:11	IgA	39.1	68.4	94.98	10(+-)	-	1.17	0.14	140	80	3 months	0	0	0	0	0
702	M	64	2021-07-01 11:24:53	ANCA-associated glomerulonephritis	27.9	450.4	11.06	250(3+)	3.0(3+)	101.92	3	123	83	First found	0	0	0	Ⅴ	0
703	F	40	2021-07-01 11:24:37	MN	30.8	42.5	123.03	20(1+)	3.0(3+)	3.49	2.98	112	73	0	0	0	0	0	1
704	F	47	2021-07-01 11:24:18	C3	37	51.9	109.67	250(3+)	1.0(2+)	331.96	0.44	119	81	First found	0	0	1	0	1
705	M	50	2021-07-01 11:20:56	Hypertensive Renal Disease	47.9	121.5	59.48	20(1+)	0.3(1+)	5.27	0.24	139	80	6 years	0	0	0	Ⅲ	0
706	M	67	2021-07-01 11:20:09	MN	22.2	119.9	53.64	20(1+)	3.0(3+)	25.4	2.85	123	79	0	0	0	0	0	1
707	M	64	2021-06-28 11:21:48	IgA	24.5	57.4	102.86	-	3.0(3+)	2.32	4.06	168	63	10 years	10 years	0	0	0	1
708	F	66	2021-06-28 11:21:31	FSGS	20.9	27.32	18.17	50(2+)	10(4+)	156.5	8.98	154	80	0	0	1	1	0	1
709	M	29	2021-06-28 11:21:16	Hypertensive Renal Disease	43	103	84.17	-	0.3(1+)	0.32	1.07	150	94	10 days	0	0	0	0	0
710	M	26	2021-06-24 11:45:20	Lipoprotein nephropathy	41.1	57.4	134.33	250(3+)	0.3(1+)	107.86	0.18	97	64	0	0	0	0	0	0
711	M	49	2021-06-24 11:45:05	MN	31.64	66.9692	81.53	20(1+)	10(4+)	43.4	9.28	123	86	0	First found	0	0	0	1
712	M	34	2021-06-24 11:44:51	IgA	45.9	80.6	109.31	50(2+)	0.3(1+)	98.4	0.21	115	84	0	0	0	0	0	0
713	F	64	2021-06-24 11:44:32	MCD	27.1	56	94.92	50(2+)	1.0(2+)	41.4	2.18	152	80	4 years	0	0	0	0	1
714	F	33	2021-06-21 11:42:45	IgA	38.3	87.6	75.02	250(3+)	-	36.05	0.08	103	63	0	0	0	0	0	0
715	F	72	2021-06-21 11:02:37	MN	30.8	64.3	82.9	10(+-)	1.0(2+)	0.32	2.2	160	65	10 years	0	0	0	0	1
716	M	26	2021-06-21 11:02:25	MCD	15.9	133.2	63	20(1+)	10(4+)	7.38	12.42	122	95	0	0	0	1	0	1
717	F	35	2021-06-17 11:59:54	MCD	21.4	47.9	122.51	-	1.0(2+)	0.41	0.64	94	68	0	0	0	0	0	0
718	M	57	2021-06-17 11:58:37	TIN	42.6	119.1	58.01	-	-	0.34	0.06	120	86	0	10 years	0	1	0	0
719	M	36	2021-06-17 11:58:28	HBVN	45.9	166.5	44.84	-	0.3(1+)	0.36	0.46	112	76	1 month	0	0	0	Ⅲ	0
720	F	61	2021-06-17 11:58:18	Lipoprotein nephropathy	41.4	46.9	102.77	20(1+)	1.0(2+)	6.59	1.01	120	89	0	0	0	0	0	0
721	F	59	2021-06-17 11:58:09	MCD	42.1	64.9	89.81	50(2+)	0.15(+-)	16.76	0.07	124	88	13 years	0	0	0	0	0
722	F	30	2021-06-17 11:57:59	LN	26.2	71.5	97.94	250（3+）	3.0（3+）	43.2	1.42	98	71	0	0	0	0	0	0
723	F	58	2021-06-17 11:57:45	Crescentic glomerulonephritis	37.8	62.9	93.94	50(2+)	0.3(1+)	24.37	0.21	113	86	3 months	0	1	0	0	0
724	M	60	2021-06-10 10:48:38	MN	30.4	93	76.6	-	1.0（2+）	0.8	3	97	54	19 years	0	0	0	0	1
725	M	66	2021-06-10 10:48:25	MCD	19.4	71.8	92.51	-	1.0(2+)	0.09	1.54	120	59	0	0	0	0	0	1
726	M	36	2021-06-07 12:05:06	IgA	46.5	85.4	100.51	50(2+)	0.3(1+)	8.23	0.38	132	94	0	0	0	0	0	0
727	F	46	2021-06-07 12:04:56	IgA	39.7	54.3	108.82	50(2+)	0.3(1+)	12.02	0.38	117	76	2 months	0	0	0	0	0
728	M	37	2021-06-07 12:00:02	Hypertensive Renal Disease	41.6	166.6	44.49	50(2+)	1.0(2+)	22.61	1.05	188	142	First found	0	0	0	Ⅲ	0
729	M	23	2021-06-07 11:59:46	MCD	17.8	197.3	40.01	50(2+)	10(4+)	10.98	10.51	135	93	0	0	0	1	0	1
730	M	42	2021-06-03 11:27:49	MN	24.9	94.5	85.26	50(2+)	10(4+)	12.94	7.67	113	80	0	0	0	0	0	1
731	M	17	2021-06-03 11:27:34	HSPN	46.1	49.3	149.696	20(1+)	0.3(1+)	7.8	1.59	134	88	0	5 months	0	0	0	0
732	F	64	2021-06-03 11:27:19	IgA	37.1	79.6	68.23	20(1+)	0.3(1+)	4.57	0.44	136	83	15 years	0	0	0	Ⅱ	0
733	F	30	2021-06-03 11:27:05	IgA	40.3	59.2	118.35	50(2+)	0.3(1+)	16.45	0.25	127	82	0	0	0	0	0	0
734	M	36	2021-06-03 11:26:50	DN	49.2	70.2	115.27	-	-	0.09	0.18	132	94	0	8 months	0	0	0	0
735	M	56	2021-06-03 11:26:29	MN	22	74	98.02	50(2+)	10(4+)	3.35	8.75	112	64	0	0	0	0	0	1
736	M	23	2021-05-31 11:05:32	MCD	48	83.3	113.48	20(1+)	-	2.27	0.11	133	94	0	0	0	0	0	0
737	F	49	2021-05-31 11:05:23	MN	30.9	46.4	112.2	20(1+)	1.0(2+)	4.59	0.68	131	95	0	0	0	0	0	1
738	F	58	2021-05-31 11:04:48	MN	29.7	55.5	99.3	10(+-)	3.0(3+)	2.02	5.31	107	79	7 years	0	0	0	0	1
739	F	37	2021-05-31 11:04:39	MN	22.4	37.6	130.82	50(2+)	3.0(3+)	23.38	1.46	102	71	0	0	0	0	0	1
740	F	41	2021-05-28 16:31:42	LN	40	61	108.47	50(2+)	0.15(+-)	0.56	1.34	124	86	0	0	0	0	0	1
741	M	68	2021-05-27 10:58:35	ANCA-associated glomerulonephritis	43.7	341.6	15.02	250(3+)	-	43.92	0.31	112	74	20 years	4 years	0	0	Ⅳ	0
742	F	48	2021-05-27 10:36:52	MCD	18.3	60.4	103.61	10(+-)	10(4+)	1.85	3.46	145	70	0	0	0	0	0	1
743	F	28	2021-05-27 10:36:40	MCD	41.8	51.5	125.65	250(3+)	0.15(+-)	90.43	0.09	105	60	0	0	0	0	0	0
744	M	64	2021-05-24 11:41:06	DN	37.8	137.7	46.34	10(+-)	3.0(3+)	9.7	2.38	119	70	4 years	10 years	0	0	Ⅲ	0
745	M	43	2021-05-24 11:40:57	IgA	29.2	76.4	105.99	250(3+)	3.0(3+)	189.5	3	140	88	0	0	0	0	0	0
746	M	48	2021-05-24 11:40:33	MN	20.7	90	86.1	50(2+)	10(4+)	54.13	3.75	144	88	0	0	0	0	0	1
747	M	35	2021-05-20 11:30:08	Hypertensive Renal Disease	39.9	114	71.38	250(3+)	1.0(2+)	70.42	3.05	178	103	2 years	0	0	0	Ⅲ	0
748	F	16	2021-05-20 11:29:54	FSGS	33.9	1002	7.42515	250(3+)	1.0(2+)	45.04	3.05	123	87	0	0	0	0	Ⅴ	0
749	F	44	2021-05-20 11:29:41	IgA	27	61.4	105.98	250(3+)	1.0(2+)	116.23	0.43	105	75	0	0	0	0	0	0
750	F	64	2021-05-20 11:29:30	MN	30.6	60	92.79	50(2+)	1.0(2+)	2.38	2.94	142	75	0	0	0	0	0	1
751	F	63	2021-05-17 11:00:26	MN	30.3	57.3	94.88	10(+-)	3.0(3+)	5.8	0.83	107	69	5 months	5 months	0	0	0	0
752	M	69	2021-05-17 11:00:14	Renal Amyloidosis	25.4	84	80.19	-	-	1.12	3.05	83	50	10 years	0	1	0	0	1
753	M	62	2021-05-17 11:00:03	Immune kidney disease	24.7	146	43.78	50(2+)	10(4+)	14.53	5.79	130	80	10 months	0	0	0	0	0
754	F	52	2021-05-13 10:47:06	LN	31.64	64.7614	81.53	-	3.0(3+)	0.25	5.76	135	72	0	0	0	0	0	0
755	M	69	2021-05-13 10:43:57	DN	34	98.9	66.75	-	10(4+)	2.34	12.81	124	84	1 year	5 years	0	1	0	1
756	M	37	2021-05-13 10:43:45	MN	31.8	58.9	123.03	50(2+)	10(4+)	3.89	3.59	119	82	0	0	0	0	0	0
757	F	52	2021-05-10 10:56:29	IgA	38.8	52.4	105.56	250(3+)	1.0(2+)	52.7	0.99	112	75	3 months	0	0	0	0	0
758	F	52	2021-05-10 10:56:17	Hypertensive Renal Disease	43.2	135.5	38.74	10(+-)	-	0.58	3.05	126	73	The course of disease is unknown	0	0	0	0	0
759	F	48	2021-05-10 10:55:59	MN	26.1	53.2	108.02	50(2+)	10(4+)	5.94	6.64	117	91	7 years	0	0	0	0	1
760	F	32	2021-05-06 11:38:49	MN	27.1	34.1	139.92	20(1+)	1.0(2+)	3.01	4.37	123	93	0	0	0	0	0	1
761	F	65	2021-05-06 11:38:31	MN	19.1	69.9	78.72	20(1+)	10(4+)	1.04	7.83	149	89	First found	0	0	0	0	1
762	M	14	2021-05-06 11:36:55	MCD	16.5	66	114.545	-	10(4+)	0	8.38	132	80	0	0	0	0	0	1
763	M	69	2021-05-06 11:36:40	MPGN	26.2	174.1	33.69	50(2+)	3.0(3+)	5.2	3.05	199	92	First found	0	0	0	Ⅳ	1
764	M	73	2021-05-06 11:36:27	MCD	18.7	171.7	33.31	20(1+)	10(4+)	6.77	10.99	90	60	0	0	1	1	0	1
765	F	35	2021-04-29 10:53:10	IgA	32.2	150.5	38.45	50(2+)	1.0(2+)	5	2.43	115	77	3 years	0	0	0	Ⅲ	0
766	F	77	2021-04-29 10:52:54	Hypertensive Renal Disease	34.8	197.8	20.57	50(2+)	-	7.13	0.1	133	59	10 years	10 years	0	0	Ⅴ	0
767	M	21	2021-04-29 10:52:32	FSGS	44.1	76.9	123.37	-	1.0(2+)	0.32	1.65	131	71	0	0	0	0	0	0
768	M	38	2021-04-26 10:51:38	Renal lesion associated with malignant tumor	23.7	122.2	64.26	10(+-)	3.0(3+)	4.57	3.05	119	90	0	0	1	0	0	1
769	F	66	2021-04-26 10:51:15	DN	48	85.3	61.44	20(1+)	1.0(2+)	1.73	0.31	151	84	3 years	3 years	0	0	Ⅲ	0
770	F	24	2021-04-26 10:04:46	MCD	25.4	55.1	126.39	-	1.0(2+)	0.92	2.54	108	81	0	0	0	0	0	1
771	M	52	2021-04-26 10:04:29	MN	25.3	90	83.71	50(2+)	1.0(2+)	9.83	3.05	134	72	First found	0	0	0	0	1
772	F	54	2021-04-26 10:04:12	Renal lesion associated with malignant tumor	28.7	150.8	33.57	20(1+)	1.0(2+)	1.9	3.56	146	91	First found	0	1	0	Ⅲ	0
773	F	32	2021-04-22 11:07:09	IgA	35.3	67.4	103.72	20(1+)	0.3(1+)	15.68	0.18	117	80	1 month	0	0	0	0	0
774	M	45	2021-04-22 11:06:59	MN	27.9	59.1	116.14	20(1+)	10(4+)	15.62	7.59	113	80	0	0	0	0	0	1
775	M	30	2021-04-22 11:06:49	IgA	35.2	77.3	115.57	250(3+)	1.0(2+)	37.24	0.71	135	75	0	0	0	0	0	0
776	M	48	2021-04-19 11:35:31	IgA	41.5	87	90.33	250(3+)	0.3(1+)	33.48	0.45	123	92	0	0	0	0	0	0
777	F	30	2021-04-19 11:35:18	MCD	43.4	46.6	128.04	10(+-)	0.15(+-)	1.21	0.28	129	82	0	0	0	0	0	0
778	F	36	2021-04-19 11:34:46	FSGS	39	90	71.1	20(1+)	1.0(2+)	1.48	1.19	110	73	3 months	0	0	0	0	0
779	M	48	2021-04-19 11:34:16	TIN	42.5	582.4	9.07	20(1+)	1.0(2+)	0.09	1.2	120	89	0	0	0	1	Ⅴ	0
780	F	65	2021-04-19 11:34:01	MCD	19.8	175.2	25.92	50(2+)	10(4+)	6.59	4.04	134	85	First found	0	0	1	0	1
781	F	43	2021-04-15 11:33:55	MsPGN	36.4	132	42.6	-	0.3(1+)	1.42	0.31	95	62	0	0	1	0	Ⅲ	0
782	M	24	2021-04-15 11:33:41	IgA	45.2	84.7	110.44	250(3+)	1.0(2+)	274.61	1.08	141	77	1 year	0	0	0	0	0
783	M	53	2021-04-15 11:33:26	IgA	28.4	103.4	70.78	20(1+)	3.0(3+)	4.36	4.19	123	77	0	0	0	0	0	0
784	F	44	2021-04-15 11:33:09	IgA	28.1	91.4	65.97	250(3+)	1.0(2+)	53.46	2.59	141	82	0	0	0	0	0	1
785	F	55	2021-04-15 11:32:51	IgA	38	38.2	114.68	50(2+)	1.0(2+)	2.77	0.96	136	93	0	0	0	0	0	0
786	F	65	2021-04-15 11:32:03	MsPGN	32.1	42.5	103.22	50(2+)	1.0(2+)	50.31	1.06	129	88	0	0	0	0	0	0
787	F	20	2021-04-12 11:46:46	LN	31.64	88.3111	81.53	20（1+）	1.0(2+)	2	16.09	143	107	0	0	0	0	0	0
788	M	43	2021-04-12 11:46:05	DN	18.5	154.7	46.65	50(2+)	10(4+)	19.49	12.51	149	95	8 months	10 years	0	0	Ⅲ	1
789	M	67	2021-04-12 11:45:50	Crescentic glomerulonephritis	26.1	1188.7	3.35	-	-	1	3.05	181	91	First found	0	0	1	0	0
790	F	67	2021-04-12 11:45:26	Hypertensive Renal Disease	19.5	88.8	58.12	20(1+)	3.0(3+)	1.04	9.22	117	75	10 years	10 years	0	1	0	1
791	M	57	2021-04-12 11:45:13	MN	24.6	58	107.58	50(2+)	10(4+)	16.38	1.45	157	99	First found	0	0	0	0	1
792	M	45	2021-04-12 11:44:55	MN	18	68.3	109.44	250(3+)	10(4+)	45.43	3.94	125	87	0	0	0	0	0	1
793	M	58	2021-04-12 11:39:15	IgA	36.1	138.2	48.12	20(1+)	0.3(1+)	1.73	0.51	117	85	1 year	0	0	0	Ⅲ	0
794	M	30	2021-04-08 10:39:45	IgA	33.7	225.6	32.39	50(2+)	3.0(3+)	34.34	4.73	125	87	1 year	0	0	0	0	1
795	M	57	2021-04-08 10:39:35	Lipoprotein nephropathy	23.3	299	18.93	50(2+)	3.0(3+)	3.04	6.91	175	84	1 year	2 years	0	0	Ⅴ	0
796	M	51	2021-04-08 10:39:25	IgA	38.5	85.1	90.84	50(2+)	0.3(1+)	21.35	0.29	131	82	0	0	0	0	0	0
797	F	42	2021-04-08 10:39:15	IgA	33.9	89.1	68.99	250(3+)	1.0(2+)	44.35	2.95	146	80	2 months	0	0	0	0	0
798	F	27	2021-04-01 12:10:07	LN	39.7	59.1	120.94	20(1+)	1.0(2+)	7.81	0.77	102	71	0	0	0	0	0	0
799	M	77	2021-03-29 10:59:17	DN	32.7	72.8	85.15	10（+-）	3.0(3+)	0.47	3.07	171	91	10 years	13 years	0	0	Ⅰ	0
800	F	52	2021-03-29 10:59:07	MN	33.1	67	85.82	20(1+)	0.3(1+)	2.77	0.7	140	74	0	0	0	0	0	0
801	F	41	2021-03-29 10:58:52	MCD	42.8	39.6	125.04	-	-	0.97	0.18	140	90	The course of disease is unknown	0	0	0	0	0
802	M	58	2021-03-25 11:42:26	DN	19.2	60.1	105.28	20(1+)	1.0(2+)	11.99	1.1	173	99	half a year	15 years	0	0	0	1
803	M	18	2021-03-25 11:42:04	MCD	19.5	53.9	127.82	-	-	1.19	4.94	119	78	0	0	0	0	0	1
804	F	37	2021-03-25 11:41:50	MCD	40	41.2	126.94	250(3+)	-	29.63	0.11	103	69	0	0	0	0	0	0
805	M	40	2021-03-25 11:41:37	DN	34.9	112.2	70.26	50(2+)	1.0(2+)	11.07	4.26	179	95	5 years	5 years	0	0	Ⅱ	0
806	F	45	2021-03-25 11:41:26	TIN	38.8	75.3	82.8	-	-	0.61	0.25	102	59	0	0	0	0	Ⅰ	0
807	M	67	2021-03-22 11:56:56	MN	24.1	64.5	96	50(2+)	3.0(3+)	14.15	3.27	100	40	0	0	0	0	0	1
808	F	54	2021-03-22 11:56:43	MN	33.1	49	106.41	20(1+)	10(4+)	5.76	15.3	112	81	10 years	0	0	0	0	1
809	M	36	2021-03-22 11:56:33	DN	31	111	73.2	10（+-）	1.0(2+)	1.17	3.11	100	53	1 week	9 months	0	0	Ⅱ	0
810	F	16	2021-03-22 11:56:23	MCD	19.2	40.8	182.353	-	10(4+)	4.39	16.52	117	69	0	0	0	0	0	1
811	F	74	2021-03-22 11:56:13	MN	21.9	371	9.82	10（+-）	3.0(3+)	6.14	5.63	169	80	2 years	0	0	0	Ⅴ	1
812	M	60	2021-03-18 10:49:38	MsPGN	41.7	92.3	77.3	-	1.0(2+)	0.32	4.66	152	88	2 years	2 years	0	0	0	0
813	M	58	2021-03-18 10:49:19	MN	23.7	60.8	104.78	250(3+)	3.0(3+)	300.02	5.95	111	77	0	0	0	0	0	1
814	M	41	2021-03-17 15:56:44	LN	36.1	39.8	140.53	10（+-）	-	2.36	0.04	130	80	0	0	0	0	0	0
815	M	65	2021-03-15 11:31:27	DN	24.4	74.5	91.76	50(2+)	10(4+)	18.61	6.41	185	89	3 years	half a year	0	0	0	1
816	M	37	2021-03-15 11:31:17	IgA	41.1	78.8	109.16	-	0.3(1+)	0.5	0.54	130	85	0	0	0	0	0	0
817	F	75	2021-03-15 11:30:51	MN	22	71.8	71.04	10（+-）	3.0(3+)	6.95	7.58	118	59	0	0	0	0	0	0
818	F	64	2021-03-15 11:30:39	FSGS	38.4	102.4	49.96	250(3+)	0.3(1+)	19.69	3.05	132	72	1 month	0	0	0	Ⅲ	0
819	F	65	2021-03-11 11:10:25	MN	22.5	78.5	68.41	10（+-）	3.0(3+)	5.58	9.55	162	71	1 year	8 years	0	0	Ⅱ	1
820	M	62	2021-03-11 11:10:11	ANCA-associated glomerulonephritis	34.3	622.2	7.59	10（+-）	0.15(+-)	2.63	0.65	145	77	0	0	0	1	0	0
821	M	39	2021-03-11 11:09:59	IgA	36.2	111.8	71.06	250(3+)	0.3(1+)	66.89	0.36	140	95	0	0	0	0	Ⅱ	0
822	F	53	2021-03-11 11:09:49	MN	20.5	33.5	121.44	50(2+)	1.0(2+)	14.06	10.52	140	84	0	0	0	0	0	1
823	M	58	2021-03-09 16:25:42	Immune kidney disease	31.8	101.7	69.72	10（+-）	0.3(1+)	1.51	2.47	155	110	The course of disease is unknown	0	0	0	Ⅱ	0
824	F	27	2021-03-09 16:25:24	LN	23.7	98.6	67.82	250(3+)	10(4+)	5.4	7.59	121	84	0	0	0	0	Ⅱ	1
825	M	19	2021-03-08 11:36:05	TIN	47.8	160.6	52.78	250(3+)	0.3(1+)	120.73	3.05	113	62	0	0	0	0	Ⅲ	0
826	M	39	2021-03-08 11:35:53	IgA	43.3	85.8	97.86	-	0.3(1+)	1.6	0.32	130	87	4 months	0	0	0	0	0
827	F	24	2021-03-08 11:35:35	LN	21.7	59.5	123.24	50(2+)	10(4+)	15.97	3.05	139	83	0	0	0	0	0	1
828	M	78	2021-03-08 11:35:24	Hypertensive Renal Disease	35.9	143	40.12	-	1.0(2+)	0.65	3.62	153	71	20 years	First found	0	0	Ⅲ	0
829	M	55	2021-03-08 11:35:13	DN	26.9	96.6	75.78	50(2+)	10(4+)	54.2	8.51	130	80	3 years	3 years	0	0	Ⅱ	1
830	M	57	2021-03-04 11:08:35	MN	27.1	39.5	125.98	20(1+)	3.0(3+)	8.89	5.73	141	71	3 months	0	0	0	0	1
831	M	18	2021-03-04 11:08:19	MCD	49.9	152.8	47.9058	-	-	0.29	0.1	117	75	0	0	0	0	Ⅱ	0
832	F	69	2021-03-04 11:08:05	MPGN	28.1	101.9	48.52	250(3+)	-	5.58	0.27	126	80	0	0	0	0	Ⅲ	0
833	F	42	2021-03-04 11:07:52	DN	32	58.3	109.33	10（+-）	1.0(2+)	0.77	4.72	141	82	First found	2 months	0	0	0	1
834	M	32	2021-03-01 11:03:29	IgA	38.3	85	103.96	250(3+)	0.15(+-)	8.08	0.22	148	92	0	0	0	0	Ⅱ	0
835	F	35	2021-03-01 11:03:19	LN	33.5	41.9	128.03	50(2+)	1.0(2+)	28.62	1.6	102	78	0	0	0	0	0	0
836	F	48	2021-03-01 11:03:07	HSPN	42.8	44.8	114.31	50(2+)	0.3(1+)	11.3	0.34	157	64	1 month	0	0	0	0	0
837	M	16	2021-03-01 11:02:43	IgA	40.6	71.4	104.202	250(3+)	0.3(1+)	77.29	0.14	100	69	0	0	0	0	0	0
838	F	64	2021-02-25 10:55:47	MN	35	59.7	93.41	50(2+)	0.3(1+)	8.3	3.05	159	78	half a year	0	0	0	0	0
839	M	43	2021-02-25 10:55:37	MCD	40.2	118.7	64.26	50(2+)	1.0(2+)	5.96	0.93	159	74	0	0	0	0	Ⅲ	0
840	F	53	2021-02-25 10:55:27	MCD	15.5	69.6	86.09	10（+-）	10(4+)	4.59	3.05	159	87	First found	0	0	1	0	1
841	F	52	2021-02-22 11:14:53	MN	20.9	72.8	82.11	20(1+)	3.0(3+)	13.97	2.94	119	81	0	0	0	0	0	1
842	F	16	2021-02-22 11:14:44	LN	25.1	36.9	120	20(1+)	3.0(3+)	16.16	2.88	121	82	0	0	0	0	0	0
843	M	84	2021-02-22 11:14:27	MCD	17.1	216.3	23.32	250(3+)	10(4+)	248.71	2.33	140	91	0	0	0	1	0	1
844	M	84	2021-02-22 11:14:15	MCD	23.6	143.8	38.21	10（+-）	3.0(3+)	0.45	0.23	134	81	30 years	0	0	0	0	1
845	F	45	2021-02-18 10:09:25	LN	18	82.5	74.67	250(3+)	3.0(3+)	25.29	4.29	126	73	0	0	0	0	Ⅱ	1
846	F	39	2021-02-07 11:33:32	DN	25.2	99.1	61.96	20(1+)	1.0(2+)	3.92	1.92	154	92	5 months	10 years	0	0	Ⅲ	1
847	M	61	2021-02-07 11:08:35	MN	21.8	68	97.98	50(2+)	1.0(2+)	5	3.46	129	96	10 years	0	0	0	0	1
848	M	35	2021-02-07 11:08:19	TIN	40.1	135.2	58.08	10（+-）	1.0(2+)	0.13	0.94	138	76	0	0	0	0	Ⅲ	0
849	M	34	2021-02-07 11:07:59	HSPN	41.7	88.1	98.17	50(2+)	0.3(1+)	74.36	0.29	139	87	0	0	0	0	0	0
850	M	42	2021-02-04 11:16:06	IgA	29.9	129.7	58.14	50(2+)	1.0(2+)	32.38	4.44	150	101	1 year	0	0	0	Ⅲ	0
851	M	52	2021-02-04 11:14:44	MCD	32.8	679.7	7.32	20(1+)	0.3(1+)	1.46	0.62	154	94	First found	0	0	1	0	0
852	M	73	2021-02-04 11:13:54	DN	28	155.7	37.5	250(3+)	3.0(3+)	3771.95	8.09	197	110	16 years	12 years	0	0	Ⅲ	1
853	F	26	2021-02-04 11:13:36	IgA	36.8	71.1	101.42	250(3+)	0.3(1+)	327.55	0.23	122	81	0	0	0	0	0	0
854	M	57	2021-02-04 11:13:20	IgA	42.4	117.5	58.96	-	-	0.36	0.14	121	87	2 years	0	0	0	0	0
855	F	21	2021-02-04 11:12:55	IgA	33.1	52.1	131.49	250(3+)	3.0(3+)	356.29	0.55	109	75	0	0	0	0	0	0
856	M	40	2021-02-03 15:13:37	LN	28.1	62.7	117.41	-	3.0(3+)	2.03	3.04	131	78	0	0	0	0	0	0
857	F	28	2021-02-01 11:07:34	IgA	34	67.8	105.92	250(3+)	1.0(2+)	243.97	1.46	132	91	First found	0	0	0	Ⅱ	0
858	M	61	2021-02-01 11:07:14	DN	24.9	103	67.23	20(1+)	10(4+)	8.42	3.05	146	68	3 years	15 years	0	0	Ⅱ	0
859	M	65	2021-01-28 11:03:23	ANCA-associated glomerulonephritis	35.2	486	10.02	250(3+)	1.0(2+)	56.45	0.84	133	68	0	0	0	1	0	0
860	M	46	2021-01-28 11:03:11	MN	28	57.2	116.89	10（+-）	3.0(3+)	3.13	1.87	143	82	0	0	0	0	0	1
861	M	41	2021-01-28 11:02:49	Hypertensive Renal Disease	45.5	97.8	82.37	-	0.3(1+)	0.54	0.62	169	111	3 years	0	0	0	Ⅱ	0
862	M	27	2021-01-25 11:20:18	IgA	39.8	84.6	108.29	50(2+)	0.15(+-)	2.9	0.15	119	80	1 month	0	0	0	0	0
863	F	56	2021-01-25 11:20:08	HSPN	36.8	67.9	86.85	50(2+)	0.15(+-)	2.83	3.05	126	68	0	0	0	0	0	0
864	M	23	2021-01-25 11:19:57	MCD	19.6	76.3	122.04	20(1+)	10(4+)	2.79	11.7	158	94	0	0	0	1	0	1
865	M	20	2021-01-21 12:04:34	MCD	18.8	78.2	123.39	-	-	0.16	5.89	136	75	0	0	0	0	0	1
866	F	55	2021-01-21 12:04:14	MN	29.1	73.7	79.21	20(1+)	3.0(3+)	7.06	3.05	124	76	3 years	0	0	0	0	1
867	F	21	2021-01-21 12:03:59	IgA	37.1	72.3	102.94	250(3+)	0.3(1+)	100.26	0.42	158	88	0	0	0	0	0	0
868	M	48	2021-01-21 12:03:46	IgA	42.6	92.9	83.44	50(2+)	0.3(1+)	23.11	0.42	154	102	3 months	0	0	0	Ⅱ	0
869	F	29	2021-01-21 12:03:34	FSGS	42.5	282.5	18.73	250(3+)	0.3(1+)	55.73	0.87	122	75	1 month	0	0	0	Ⅳ	0
870	M	62	2021-01-21 12:03:21	DN	31.3	128.3	51.19	50(2+)	3.0(3+)	9.61	4.5	145	81	First found	20 years	0	0	0	1
871	F	47	2021-01-18 11:54:17	LN	31.3	81.9	68.1319	-	1.0(2+)	0.92	2.46	154	100	1 month	0	0	0	0	0
872	M	51	2021-01-18 10:58:45	MN	30.7	56.5	113.43	20(1+)	1.0(2+)	3.26	1.17	157	94	0	0	0	0	0	1
873	F	25	2021-01-18 10:56:48	IgA	42.6	46	133.19	250(3+)	3.0(3+)	104.62	1.65	149	93	0	0	0	0	0	0
874	M	55	2021-01-14 10:13:16	MN	22.4	88.3	84.47	20(1+)	3.0(3+)	9.09	3.59	142	89	0	0	0	0	Ⅱ	1
875	F	52	2021-01-11 10:52:29	IgA	35.6	102.7	54.17	250(3+)	0.3(1+)	221.31	0.19	129	75	0	0	0	0	Ⅲ	0
876	F	59	2021-01-11 10:52:18	Familial recurrent hematuria syndrome	34.1	74.2	76.39	50(2+)	-	41.45	0.12	118	84	0	0	0	0	Ⅱ	0
877	F	33	2021-01-11 10:52:07	DN	27.8	237.6	22.45	10（+-）	3.0(3+)	9.29	3.05	165	92	9 months	1 year	0	0	Ⅳ	0
878	F	30	2021-01-07 10:59:07	IgA	39.1	51.1	124.22	20(1+)	1.0(2+)	31.5	0.49	141	99	0	0	0	0	0	0
879	F	44	2021-01-07 10:58:49	Renal lesion associated with malignant tumor	40.5	83.7	73.37	250(3+)	0.3(1+)	155.02	0.43	96	70	0	0	0	0	0	0
880	F	14	2021-01-07 10:35:27	LN	30.4	171.8	44.0047	250(3+)	1.0(2+)	976.79	5.33	124	68	0	0	0	0	Ⅱ	0
881	M	68	2021-01-04 10:49:30	FSGS	18.6	169.4	35.07	50(2+)	3.0(3+)	2.38	9.48	141	75	1 month	1 month	0	1	0	1
882	F	54	2021-01-04 10:49:17	MN	23	54.2	102.93	50(2+)	10(4+)	11.83	6.68	117	75	0	0	0	0	0	1
883	M	51	2021-01-04 10:49:05	DN	21.8	80.9	96.57	20(1+)	3.0(3+)	10.89	6.79	155	92	1 year	5 years	0	0	Ⅰ	1
884	F	57	2020-12-30 11:51:34	DN	23	47.1	105.55	-	3.0(3+)	2.29	6.32	173	70	10 years	10 years	0	0	0	1
885	F	52	2020-12-28 11:25:13	MN	22.4	56.6	102.91	50(2+)	3.0(3+)	3.2	3.05	127	87	0	0	0	0	0	0
886	F	43	2020-12-28 11:24:57	IgA	32.9	57.1	109.31	250(3+)	1.0(2+)	42.89	1.16	117	70	0	0	0	0	0	0
887	F	73	2020-12-28 11:24:21	HSPN	33.3	286.3	13.53	250(3+)	3.0(3+)	1878.7	3.94	174	83	First found	0	1	1	0	1
888	M	71	2020-12-28 11:23:48	IgA	16.8	183	31.28	50(2+)	10(4+)	25.24	12.58	120	81	0	0	0	1	0	1
889	M	67	2020-12-28 11:23:32	DN	23.2	123.3	51.85	20(1+)	10(4+)	10.84	9.04	133	80	First found	10 years	0	0	Ⅲ	1
890	M	44	2020-12-24 10:52:55	Sarcoidosis	41.2	238.1	27.51	-	-	0.07	3.05	123	74	0	0	0	0	Ⅳ	0
891	M	30	2020-12-24 10:32:15	IgA	44.4	69.6	120.66	20(1+)	1.0(2+)	7.87	0.56	119	80	0	0	0	0	0	0
892	M	29	2020-12-21 11:36:16	IgA	40.2	95.2	92.58	10（+-）	1.0(2+)	1.46	0.82	108	76	0	0	0	0	0	0
893	M	48	2020-12-21 11:36:06	DN	26	102	74.53	50(2+)	3.0(3+)	7.7	6.87	142	80	1 year	8 years	0	0	0	1
894	M	33	2020-12-21 11:35:56	MCD	50.4	73.2	115.72	-	1.0(2+)	2.34	0.68	135	92	0	0	0	0	0	0
895	M	46	2020-12-21 11:35:45	MCD	38.1	95.7	81.64	-	-	0.92	0.15	136	87	0	0	0	0	Ⅱ	0
896	M	80	2020-12-21 11:35:35	MN	26.3	112.8	52.71	20(1+)	3.0(3+)	2.39	10.36	129	69	1 year	0	0	0	Ⅲ	1
897	F	38	2020-12-17 10:36:52	IgA	35.2	117.9	50.58	50(2+)	0.3(1+)	5.24	1.02	120	80	10 days	0	0	0	Ⅲ	0
898	F	23	2020-12-17 10:36:20	LN	22.7	48	133.19	10（+-）	10(4+)	5.4	4.53	138	82	0	0	0	0	0	1
899	M	17	2020-12-17 10:25:21	LN	22.2	311.4	23.6994	20(1+)	3.0(3+)	5.92	3.05	142	93	First found	0	0	0	Ⅲ	0
900	F	53	2020-12-14 11:16:29	MCD	24	190.3	25.52	20(1+)	10(4+)	5.6	8.33	141	81	First found	0	0	1	0	1
901	F	34	2020-12-14 11:15:40	Nephropathy associated with Sjogren's syndrome	22.1	34.2	137.84	50(2+)	1.0(2+)	9.4	3.05	157	93	0	0	0	0	0	1
902	F	38	2020-12-14 11:15:19	LN	21.4	76.4	85.46	250(3+)	10(4+)	437.51	3.05	146	85	10 days	0	0	0	0	1
903	M	36	2020-12-14 11:14:26	MN	32.1	58.3	124.42	10（+-）	1.0(2+)	4.3	0.99	115	63	0	0	0	0	0	0
904	M	64	2020-12-10 11:22:27	FSGS	36.8	261.6	21.33	250(3+)	0.3(1+)	23.67	0.86	130	71	0	0	0	0	Ⅳ	0
905	F	38	2020-12-10 11:22:15	MN	40.5	52	116.76	50(2+)	0.15(+-)	55.42	3.05	132	76	0	0	0	0	0	0
906	M	67	2020-12-10 11:22:06	Hypertensive Renal Disease	31.5	90.9	74.96	50(2+)	10(4+)	14.04	6.83	124	68	5 years	2 years	0	0	Ⅱ	1
907	M	64	2020-12-10 11:21:54	MCD	16.3	81.7	87.1	-	10(4+)	1.6	4.23	127	81	17 years	17 years	0	0	0	1
908	F	31	2020-12-03 11:06:32	LN	22	59.8	117.13	10（+-）	3.0(3+)	4.23	5.47	133	90	0	0	0	0	0	1
909	F	72	2020-12-03 10:59:56	MN	25.9	64.1	83.21	50(2+)	10(4+)	15.28	3.81	139	71	20 years	0	0	0	0	1
910	M	49	2020-12-03 10:59:28	IgA	38.4	100.8	75.07	20（1+）	1.0（2+）	2.47	0.38	127	89	0	0	0	0	Ⅱ	0
911	F	14	2020-12-03 10:59:03	LN	20.4	22	120	50（2+）	1.0（2+）	5	17.71	122	72	0	0	0	0	0	1
912	M	28	2020-11-30 10:56:04	IgA	37.7	95.3	93.11	50（2+）	1.0（2+）	2.18	1.32	109	72	0	0	0	0	0	0
913	F	36	2020-11-30 10:55:51	MCD	41.8	117.8	51.35	-	-	0.2	0.29	101	83	2 years	0	0	0	Ⅲ	0
914	M	44	2020-11-26 11:23:23	DN	26.5	147.1	49.24	20（1+）	10（4+）	1.69	3.5	149	88	9 months	5 years	0	0	Ⅲ	1
915	M	42	2020-11-26 11:23:05	MN	19.8	79	105.28	20（1+）	10（4+）	18.36	6.55	118	81	0	0	0	0	0	1
916	M	25	2020-11-26 11:22:54	MCD	42.7	80.7	116.27	-	0.15（+-）	0.11	0.02	106	63	0	0	0	1	0	0
917	F	57	2020-11-26 11:19:51	MN	28.5	58	98.56	-	-	0.47	0.23	94	65	0	0	0	0	0	1
918	M	55	2020-11-23 10:26:59	MN	28.4	64.6	104.38	20（1+）	1.0（2+）	8.14	2.23	104	58	0	First found	0	0	0	1
919	M	54	2020-11-19 10:57:58	DN	35.9	109.5	65.58	10（+-）	1.0（2+）	5.18	3.05	130	77	First found	20 years	0	0	Ⅱ	0
920	M	57	2020-11-19 10:34:37	MN	26.8	102.2	69.8	250（3+）	3.0（3+）	1.73	8.09	132	82	0	0	0	0	Ⅱ	1
921	M	27	2020-11-16 10:47:29	IgA	40	113.9	75.59	50（2+）	1.0（2+）	3.76	0.73	191	129	3 years	0	0	0	Ⅱ	0
922	M	59	2020-11-16 10:47:18	MN	32.9	65.1	101.16	-	3.0（3+）	2.34	1.41	157	97	8 months	5 months	0	0	0	1
923	M	41	2020-11-12 10:50:44	MN	39.7	78.8	106.88	-	3.0（3+）	0.34	2.03	142	82	0	0	0	0	0	0
924	M	48	2020-11-12 10:50:32	MCD	17.1	98.8	77.46	20（1+）	10（4+）	1.51	8.68	118	65	0	0	0	1	0	1
925	F	24	2020-11-12 10:25:40	LN	29.7	59.4	123.31	-	3.0（3+）	3.15	3.93	123	78	0	0	0	0	0	1
926	F	59	2020-11-09 10:54:09	MN	21.5	109.9	47.51	20（1+）	3.0（3+）	5.76	2.71	128	73	The course of disease is unknown	half a year	0	0	0	1
927	M	29	2020-11-09 10:53:58	MCD	20.5	68.1	122.61	10（+-）	10（4+）	1.03	9.27	114	95	0	0	0	0	0	1
928	M	47	2020-11-05 13:37:32	MCD	16.8	101.1	75.86	20（1+）	3.0（3+）	2.07	0.23	130	78	0	0	0	0	Ⅱ	1
929	M	45	2020-11-05 13:37:20	IgA	38.9	96.9	80.99	250（3+）	0.3（1+）	20.21	0.55	110	79	0	0	0	0	0	0
930	F	32	2020-11-02 10:56:32	IgA	34.3	150.9	39.15	250（3+）	3.0（3+）	157.7	1.59	138	97	1 year	0	0	0	Ⅲ	0
931	F	50	2020-11-02 10:56:20	MN	18.2	52.5	106.98	50（2+）	10（4+）	27.38	5.49	119	77	0	0	0	0	0	1
932	F	69	2020-11-02 10:56:06	MN	23.3	38.6	103.58	50（2+）	3.0（3+）	52.29	2.81	155	80	0	0	0	0	0	1
933	M	44	2020-10-29 12:00:53	Hypertensive Renal Disease	41	129	57.71	-	0.3（1+）	0.27	0.26	135	100	1 year	0	0	0	Ⅲ	1
934	M	28	2020-10-29 12:00:44	IgA	40.6	88.7	101.55	20（1+）	0.3（1+）	14.54	0.55	124	79	0	0	0	0	0	0
935	F	53	2020-10-29 12:00:33	MN	20.2	70	85.49	20（1+）	3.0（3+)	12.87	6.76	116	77	First found	0	0	0	0	1
936	M	66	2020-10-29 12:00:23	MN	16.1	125.6	51.07	10（+-）	3.0（3+）	3.82	2.86	193	131	5 years	0	0	1	0	0
937	M	52	2020-10-29 12:00:13	DN	24.1	140.2	49.33	20（1+）	3.0（3+）	16.79	10.5	174	101	1 week	1 week	0	0	Ⅲ	1
938	F	35	2020-10-29 12:00:04	IgA	33.8	47.3	123.02	50（2+）	3.0（3+）	15.41	1.2	121	79	0	0	0	0	0	0
939	M	23	2020-10-29 11:59:55	IgA	43.8	71	125.71	50（2+）	0.3（1+）	22.97	0.18	118	72	0	0	0	0	0	0
940	M	46	2020-10-26 11:03:56	MCD	20.4	81.1	99.73	-	3.0（3+）	1.42	0.41	132	78	0	0	0	0	0	1
941	F	66	2020-10-26 11:03:39	LN	25.2	131.8	36.31	10（+-）	0.3（1+）	0.38	0.48	139	67	First found	0	0	0	Ⅲ	1
942	F	49	2020-10-26 10:36:42	ANCA-associated glomerulonephritis	36.1	75	80.89	20（1+）	0.3（1+）	9.86	0.05	186	112	First found	First found	0	0	0	0
943	F	49	2020-10-22 10:55:54	MN	21.3	180.1	28.05	20（1+）	10（4+）	7.18	5.02	105	77	0	0	0	1	0	1
944	F	34	2020-10-22 10:55:41	MN	27	46.8	124.32	50（2+）	1.0（2+）	7	1.07	117	80	0	0	0	0	0	1
945	M	37	2020-10-22 10:53:44	IgA	38.9	86.7	98	250（3+）	1.0（2+）	70.36	0.87	135	87	0	0	0	0	0	0
946	M	47	2020-10-19 11:55:31	DN	40.7	144.3	49.34	-	0.3（1+）	0.04	1.21	138	95	15 years	15 years	0	0	Ⅲ	0
947	M	63	2020-10-19 11:55:20	MN	27.6	74.4	93.11	-	0.3（1+）	0.54	0.15	84	57	0	0	0	0	0	0
948	F	78	2020-10-19 11:55:07	MN	24.2	60.9	83.69	20（1+）	3.0（3+）	4.88	0.95	152	93	2 months	0	0	0	0	1
949	M	50	2020-10-15 10:26:01	HBVN	18.8	77.8	100.16	50（2+）	10（4+）	25.72	7.92	163	98	First found	0	0	0	0	1
950	M	57	2020-10-12 10:59:06	ANCA-associated glomerulonephritis	31.4	254.3	23.18	10（+-）	-	2.07	0.27	112	71	0	0	0	1	0	0
951	M	29	2020-09-28 11:07:45	MsPGN	48	103.7	83.49	-	0.3（1+）	0.29	1.89	174	106	First found	0	0	1	0	0
952	M	62	2020-09-28 11:07:34	MN	23.5	78	91.96	20（1+）	1.0（2+）	10.24	3.96	140	59	0	0	0	0	0	1
953	F	54	2020-09-28 11:07:21	FSGS	37.7	118.8	44.79	250（3+）	1.0（2+）	19.24	2.24	114	78	2 years	0	0	0	Ⅲ	0
954	F	36	2020-09-24 11:23:59	LN	30.1	574.3	7.56	250（3+）	10（4+）	167.17	28.4	127	84	First found	0	0	1	0	1
955	F	39	2020-09-24 11:23:48	IgA	38.5	42.9	123.52	20（1+）	1.0（2+）	18.34	0.7	98	63	0	0	0	0	0	0
956	F	57	2020-09-24 11:23:35	MN	31.2	49.6	103.77	50(2+)	1.0(2+)	3.73	2.35	120	60	0	0	0	0	0	0
957	F	29	2020-09-21 11:17:21	MN	31.3	38.6	137.19	-	1.0(2+)	2.5	8.67	146	86	0	6 months	0	0	0	0
958	F	44	2020-09-17 11:07:44	IgA	33.1	67.3	95.51	250(3+)	0.3(1+)	95.33	3.05	99	63	0	0	0	0	0	0
959	M	38	2020-09-14 11:18:26	Hypertensive Renal Disease	44.7	150.5	49.96	50(2+)	3.0(3+)	23.72	1.72	136	74	1 year	0	0	0	Ⅲ	0
960	M	42	2020-09-14 11:18:17	IgA	46.7	121.6	62.86	20(1+)	0.3(1+)	10.75	0.36	165	103	First found	0	0	0	Ⅱ	0
961	M	19	2020-09-14 11:18:08	MCD	18.9	93.9	100.98	10（+-）	10(4+)	2.39	9.9	119	75	0	0	0	0	Ⅰ	1
962	M	32	2020-09-14 11:17:58	IgA	42.4	73.4	116.41	250(3+)	1.0(2+)	36.27	1.75	111	62	0	0	0	0	0	0
963	M	69	2020-09-10 11:07:40	LN	34	1161.7	3.4	10（+-）	3.0(3+)	0.27	2.42	119	50	15 years	10 years	0	0	Ⅴ	0
964	F	33	2020-09-10 11:07:29	IgA	38.8	53.3	119.95	250(3+)	0.3(1+)	173.12	3.05	102	62	0	0	0	0	0	0
965	F	44	2020-09-10 11:07:18	MN	23.7	43.9	118.35	50(2+)	3.0(3+)	23.98	4.37	118	74	0	0	0	0	0	1
966	M	54	2020-09-07 11:24:42	MN	20.7	76.6	98	20(1+)	3.0(3+)	13.5	6.18	149	98	First found	0	0	0	0	1
967	M	71	2020-09-07 11:24:31	MN	25	94.7	69.37	50(2+)	10(4+)	19.01	1.16	153	93	2 years	First found	0	0	Ⅱ	1
968	M	75	2020-09-07 11:24:20	MN	17.9	56.4	95.9	250(3+)	1.0(2+)	4.63	1.22	116	74	20 years	First found	0	0	0	0
969	M	26	2020-09-07 11:24:09	DN	45.8	64.9	127.72	-	-	0.16	0.17	136	86	10 years	1 month	0	0	0	0
970	M	35	2020-09-03 10:51:23	IgA	42	90.6	94.24	50(2+)	0.3(1+)	22.1	0.16	116	78	7 months	0	0	0	Ⅰ	0
971	M	66	2020-09-03 10:51:13	MN	18.2	57.4	101.42	50(2+)	10(4+)	5.15	5.48	108	70	0	0	0	0	0	1
972	M	24	2020-09-03 10:51:04	IgA	30.1	67.3	127.61	250(3+)	3.0(3+)	34.85	1.66	135	80	0	0	0	0	0	0
973	F	69	2020-08-31 11:03:04	MCD	20.6	196.6	21.92	50(2+)	3.0(3+)	5.06	8.98	139	91	First found	0	0	1	0	1
974	F	52	2020-08-31 11:02:49	IgA	40.2	62.1	99.51	250(3+)	0.3(1+)	92.59	0.62	115	71	3 years	0	0	0	0	0
975	M	48	2020-08-31 11:02:39	ANCA-associated glomerulonephritis	24.1	582.8	9.06	250(3+)	3.0(3+)	398.86	3.09	159	106	First found	0	0	0	Ⅴ	0
976	F	46	2020-08-31 11:02:25	Hypertensive Renal Disease	25.1	62.1	103.79	20(1+)	10(4+)	16.69	6.43	176	119	10 years	0	0	0	0	1
977	F	20	2020-08-31 11:02:10	IgA	36.4	59.4	126.82	250(3+)	0.3(1+)	33.12	0.24	105	58	0	0	0	0	0	0
978	F	31	2020-08-27 10:55:32	IgA	38.6	79.6	85.42	250(3+)	3.0(3+)	15.43	0.39	150	82	3 years	0	0	0	Ⅱ	0
979	M	41	2020-08-27 10:55:25	MCD	41	74.4	108.67	50(2+)	0.15(+-)	11.03	0.07	120	85	0	0	0	0	0	0
980	M	35	2020-08-27 10:55:14	IgA	34.9	137.2	57.06	50(2+)	1.0(2+)	47.39	2.53	166	119	First found	0	0	0	Ⅲ	0
981	M	17	2020-08-24 11:33:46	MCD	17.8	50.7	145.562	-	1.0(2+)	1.82	0.59	139	83	0	0	0	0	0	1
982	M	36	2020-08-24 11:33:37	Hypertensive Renal Disease	34.2	195.3	36.97	-	1.0(2+)	0.31	1.08	172	120	5 years	0	0	0	Ⅳ	0
983	M	64	2020-08-24 11:33:26	IgA	36.5	104	65.06	50(2+)	0.3(1+)	11.59	0.32	130	80	0	0	0	0	Ⅲ	0
984	F	38	2020-08-24 11:33:15	IgA	35.2	109.8	55.12	50(2+)	-	5	0.25	103	63	0	0	0	0	Ⅱ	0
985	F	26	2020-08-24 11:33:05	DN	24.7	161.2	37.7	20(1+)	3.0(3+)	15.68	4.13	116	79	0	3 years	0	0	Ⅲ	1
986	F	39	2020-08-20 10:30:08	LN	29.9	59.7	110.79	-	1.0(2+)	1.1	4.95	113	90	0	0	0	0	0	1
987	M	51	2020-08-17 11:35:00	MN	23.8	63.6	108.04	250(3+)	10(4+)	29.47	9.55	160	88	3 months	0	0	0	0	1
988	M	65	2020-08-17 11:34:50	Hypertensive Renal Disease	32.5	91.5	75.42	20(1+)	3.0(3+)	4.25	2.32	189	113	30 years	0	0	0	Ⅱ	0
989	F	48	2020-08-17 11:34:34	MsPGN	41.1	74.3	82.39	10（+-）	0.3(1+)	9.05	0.33	148	94	4 years	0	0	0	Ⅱ	0
990	F	37	2020-08-17 11:34:22	IgA	36	83.5	77.29	50(2+)	0.5（1+）	316.58	0.4	122	80	0	0	0	0	Ⅱ	0
991	M	58	2020-08-17 11:34:11	Obesity-related glomerulopathy	38.5	63.4	102.99	20(1+)	0.3(1+)	7.11	0.52	131	94	8 years	0	0	0	0	0
992	F	57	2020-08-13 10:33:41	MN	25.3	50.2	103.36	10（+-）	3.0(3+)	3.33	2.66	164	101	10 years	0	0	0	0	1
993	F	28	2020-08-10 09:52:15	IgA	38.5	113.5	56.81	50(2+)	1.0(2+)	3.11	0.66	112	76	0	0	0	0	Ⅲ	0
994	M	61	2020-08-06 11:30:16	IgA	36.6	151.9	42.03	250(3+)	-	11.12	0.22	118	60	0	0	0	0	Ⅲ	0
995	F	36	2020-08-06 11:30:06	MCD	22	57.9	114.3	-	3.0(3+)	1.24	3.76	106	70	0	0	0	0	0	1
996	M	36	2020-08-06 11:29:56	IgA	35.9	175	42.22	-	-	0.04	0.26	173	133	First found	0	0	1	0	0
997	M	30	2020-08-06 11:29:46	MN	24.3	67.3	122.34	20(1+)	3.0(3+)	4.63	12.64	114	77	0	0	0	0	0	1
998	M	34	2020-08-06 11:29:36	MN	16.5	72.6	115.3	50(2+)	10(4+)	19.12	10.58	132	83	0	0	0	0	0	1
999	M	30	2020-08-06 11:29:17	IgA	33	404.5	15.99	250(3+)	3.0(3+)	15.91	3.44	143	82	20 days	0	0	0	Ⅳ	0
1000	F	65	2020-08-03 10:08:05	MPGN	24.6	116.9	42.27	250(3+)	10(4+)	457.51	8.74	104	73	0	10 years	0	0	0	1
1001	M	19	2020-07-30 10:59:16	MCD	19	55.7	142.85	10(+-)	10(4+)	7.63	5.63	138	77	0	0	0	0	0	1
1002	F	28	2020-07-30 10:59:05	IgA	38.8	50.7	126.3	50(2+)	0.15(+-)	9.58	3.05	90	62	0	0	0	0	0	0
1003	F	29	2020-07-30 10:58:55	IgA	37.6	61.3	117.82	50(2+)	3.0(3+)	80.14	0.34	114	72	0	0	0	0	0	0
1004	M	28	2020-07-27 10:53:00	IgA	43	96.7	91.49	250(3+)	1.0(2+)	141.01	3.05	123	89	0	0	0	0	0	0
1005	M	15	2020-07-27 10:52:46	Alport syndrome	30.8	52.2	143.678	-	10(4+)	0.45	3.55	110	78	0	0	0	0	0	1
1006	M	60	2020-07-27 10:52:26	Hypertensive Renal Disease	51.5	142.8	45.61	-	-	0.14	0.07	121	68	20 years	3 years	0	0	Ⅲ	0
1007	F	23	2020-07-23 10:41:47	LN	36.1	63.1	119.66	250(3+)	3.0(3+)	198	1.31	127	83	0	0	0	0	0	0
1008	M	23	2020-07-23 10:41:34	MCD	38.6	59.5	135.18	10(+-)	0.3(1+)	8.78	0.05	128	74	0	0	0	0	0	1
1009	M	26	2020-07-23 10:41:23	IgA	26.5	37.6	159.84	-	3.0(3+)	0.23	1.46	125	86	0	0	0	0	0	1
1010	M	62	2020-07-23 10:40:15	FSGS	31.5	982.8	4.37	250(3+)	3.0(3+)	142.56	6.3	148	68	5 years	0	0	0	Ⅴ	0
1011	F	25	2020-07-20 14:59:29	Familial recurrent hematuria syndrome	41.7	49.5	130.01	250(3+)	0.15(+-)	46.89	0.24	126	76	0	0	0	0	0	0
1012	M	57	2020-07-20 14:59:20	MCD	22	58.7	107.05	10(+-)	10(4+)	1.08	2.39	96	70	0	0	0	0	0	1
1013	M	67	2020-07-20 14:59:11	IgG4	32.1	509.5	9.33	-	-	0.09	0.19	173	97	0	0	0	0	Ⅴ	0
1014	F	57	2020-07-20 14:59:01	MN	28	44.7	107.38	50(2+)	3.0(3+)	17.66	3.65	154	81	2 weeks	0	0	0	0	1
1015	M	32	2020-07-20 14:58:50	IgA	37.7	76.2	114.63	-	3.0(3+)	39.33	0.75	127	81	0	0	0	0	0	0
1016	M	40	2020-07-20 14:58:33	FSGS	38.7	302.1	21.21	50(2+)	1.0(2+)	9.04	2.13	158	108	2 weeks	0	0	0	Ⅳ	0
1017	F	59	2020-07-20 14:58:20	DN	40.4	97.5	54.91	-	0.15(+-)	0.4	0.44	150	100	20 years	3 years	0	0	Ⅲ	0
1018	F	20	2020-07-16 11:18:40	LN	22.3	131.8	50.16	250(3+)	10(4+)	90.94	2.82	133	98	0	0	0	1	0	1
1019	M	35	2020-07-16 11:18:28	MN	28.3	125.2	63.74	20(1+)	10(4+)	6.16	7.72	146	95	3 years	0	0	0	Ⅱ	1
1020	M	18	2020-07-13 10:44:39	IgA	16.2	75.8	96.5699	50(2+)	10(4+)	6.25	6.32	130	84	0	0	0	0	0	1
1021	F	32	2020-07-13 10:44:21	LN	36.4	85.8	77.47	-	1.0(2+)	1.49	0.84	118	81	0	0	0	0	Ⅱ	0
1022	F	48	2020-07-09 10:50:37	MCD	20.5	63.9	98.87	10(+-)	10(4+)	0.2	2.9	142	91	0	0	0	0	0	1
1023	F	39	2020-07-09 10:50:15	LN	23.8	102	59.84	250(3+)	1.0(2+)	91.26	0.57	146	89	0	0	0	0	0	0
1024	M	34	2020-07-09 10:50:05	MN	20.1	77.8	112.07	10(+-)	10(4+)	11.14	7.02	120	77	0	0	0	0	0	1
1025	F	35	2020-07-09 10:49:37	MCD	31.64	77.2722	81.53	-	0.15(+-)	3.37	3.05	121	63	0	0	0	0	0	0
1026	F	48	2020-07-06 11:05:03	IgA	38.8	69.3	89.63	250(3+)	1.0(2+)	45.43	0.38	244	140	17 years	0	0	0	0	0
1027	F	56	2020-07-06 11:04:51	MCD	41.9	69.5	84.44	10(+-)	0.3(1+)	1.93	0.37	112	74	1 year	0	0	0	0	0
1028	F	28	2020-07-02 11:07:48	LN	19	56.5	121.88	250(3+)	10(4+)	74.77	5.78	138	83	0	0	0	0	0	1
1029	M	39	2020-07-02 11:07:38	MN	25.3	72.5	111.38	250(3+)	10(4+)	48.58	2.64	149	100	0	0	0	0	0	1
1030	F	34	2020-06-29 10:45:25	IgA	30.2	62.2	112.7	250(3+)	1.0(2+)	17.15	2.25	126	69	0	0	0	0	0	0
1031	M	39	2020-06-29 10:45:18	IgA	40.9	60.4	120.07	50(2+)	1.0(2+)	31.82	0.46	105	67	0	0	0	0	0	0
1032	M	51	2020-06-22 11:22:30	DN	39.1	76	100.42	10(+-)	3.0(3+)	4.45	0.94	154	86	First found	First found	0	0	0	0
1033	M	37	2020-06-22 11:21:17	IgA	38.2	102.9	79.67	50(2+)	0.15(+-)	9.14	0.14	132	74	0	0	0	0	Ⅱ	0
1034	F	36	2020-06-18 11:41:04	MCD	37.8	58.3	114.04	-	0.3(1+)	1.03	3.05	108	70	0	0	0	0	0	0
1035	F	49	2020-06-18 11:40:52	TIN	37.6	120.7	45.51	20(1+)	1.0(2+)	4.95	3.05	103	66	0	0	0	1	0	0
1036	M	43	2020-06-18 11:40:42	MN	35.1	60	117.06	50(2+)	1.0(2+)	7.74	3.05	153	93	0	0	0	0	0	0
1037	M	65	2020-06-18 11:40:06	DN	36.9	273.5	20.07	-	1.0(2+)	0.47	4.03	143	69	14 years	10 years	0	0	Ⅴ	0
1038	M	67	2020-06-15 11:32:09	MCD	22.1	64.9	95.76	-	3.0(3+)	0.34	3.05	99	65	10 years	5 years	0	0	0	1
1039	F	33	2020-06-15 11:31:54	FSGS	35.4	197.4	28.09	250(3+)	1.0(2+)	17.17	3.05	129	96	3 months	3 months	0	0	Ⅳ	0
1040	F	43	2020-06-15 11:31:39	IgA	35.2	74.9	84.51	250(3+)	1.0(2+)	339.82	2.25	151	81	2 weeks	0	0	0	0	0
1041	M	67	2020-06-15 11:31:24	MN	19.6	295.2	14.8374	50(2+)	10(4+)	20.32	3.05	121	73	1 month	0	0	0	Ⅳ	0
1042	M	78	2020-06-15 11:30:46	DN	31.64	124.7	47.35	50(2+)	3.0(3+)	74.75	6.61	120	62	2 years	22 years	0	1	Ⅳ	1
1043	M	45	2020-06-11 10:53:13	DN	29	232.3	28.14	10(+-)	3.0(3+)	2.02	11.28	106	67	1 month	7 years	0	0	Ⅳ	0
1044	M	38	2020-06-11 10:52:37	MN	22.5	61.9	119.7	50(2+)	10(4+)	11.9	4.89	135	76	0	0	0	0	0	1
1045	F	36	2020-06-08 16:09:55	LN	22.7	122.9	48.78	250(3+)	3.0(3+)	12.11	1.37	115	70	0	0	0	0	0	0
1046	F	32	2020-06-08 11:55:53	LN	17.8	80.7	83.43	-	-	1	3.05	168	105	First found	0	0	0	0	1
1047	M	27	2020-06-08 11:55:47	FSGS	40.7	231	32.15	20(1+)	1.0(2+)	5.76	0.69	145	98	3 months	0	0	0	Ⅲ	0
1048	M	79	2020-06-08 11:55:40	MN	22.2	118.2	50.16	250(3+)	10(4+)	105.35	11.63	180	91	half a year	0	0	0	0	1
1049	F	33	2020-06-08 11:55:34	MCD	19.3	92.7	70.06	10(+-)	10(4+)	53.77	10.78	130	87	0	0	0	0	0	1
1050	M	34	2020-06-08 11:55:28	MN	38.1	71.3	116.16	10(+-)	0.3(1+)	1.69	0.7	129	86	0	0	0	0	0	0
1051	F	50	2020-06-08 11:55:16	DN	31.4	81	73.19	20(1+)	2.0(2+)	5.33	2.72	145	80	2 years	2 years	0	0	0	0
1052	M	54	2020-06-04 10:42:14	MN	19.4	245.8	24.67	50(2+)	1.0(2+)	2.41	2.17	104	65	0	0	0	0	Ⅲ	0
1053	M	68	2020-06-01 11:14:21	ANCA-associated glomerulonephritis	35.9	676.1	6.58	50(2+)	1.0(2+)	3.62	0.81	126	84	2 years	0	1	0	Ⅴ	0
1054	M	74	2020-06-01 11:14:13	TIN	26.9	442	10.55	10(+-)	0.3(1+)	0.09	3.05	117	86	0	0	0	0	Ⅴ	0
1055	M	52	2020-06-01 11:14:03	IgA	22.8	88	86.62	250(3+)	3.0(3+)	440.93	6.8	131	81	0	0	0	0	0	1
1056	M	55	2020-06-01 11:13:54	DN	24.4	129.3	53.27	50(2+)	3.0(3+)	19.58	7.35	175	96	10 years	6 months	0	0	0	1
1057	M	60	2020-05-28 11:38:25	DN	34.6	76.2	94.16	-	2.0(2+)	2.03	3.05	178	99	10 years	10 years	0	0	0	1
1058	M	43	2020-05-28 11:38:15	MN	21.2	115.9	66.15	20(1+)	10(4+)	19.84	7.6	167	104	0	0	0	0	0	1
1059	F	54	2020-05-25 11:10:55	MCD	23.4	142.9	35.82	50(2+)	10(4+)	6.19	14.08	118	83	0	6 years	0	0	0	1
1060	F	49	2020-05-25 11:10:48	MCD	19.9	69.6	88.54	250(3+)	10(4+)	15.61	3.55	116	70	0	0	0	0	0	1
1061	M	21	2020-05-25 11:10:40	IgA	43.5	99.5	92.84	250(3+)	1.0(2+)	83.7	0.49	135	77	0	0	0	0	Ⅰ	0
1062	M	65	2020-05-25 11:10:29	MN	23.5	65.9	96.5	50(2+)	0.7(1+)	12.58	0.41	158	86	1 year	0	0	0	0	1
1063	M	68	2020-05-21 10:34:04	MN	25.6	68	93.28	20(1+)	3.0(3+)	5.2	6.47	104	58	0	0	0	0	0	1
1064	F	63	2020-05-21 10:31:40	MN	26.3	51.9	98.02	20(1+)	3.0(3+)	2.14	1.77	144	81	0	0	0	0	0	1
1065	F	25	2020-05-21 10:31:24	LN	19.1	43.9	135.25	50(2+)	2.0(2+)	3.17	3.58	134	77	0	0	0	0	0	1
1066	M	67	2020-05-18 11:20:33	MN	23.4	112.7	57.81	20(1+)	3.0(3+)	2.9	5.49	110	67	10 years	0	0	0	0	1
1067	F	61	2020-05-18 11:20:23	DN	28.2	115.5	44.12	10(+-)	3.0(3+)	1.55	8.23	209	101	half a month	10 years	0	0	0	1
1068	F	43	2020-05-14 11:30:13	IgA	31.4	111.4	52.3	250(3+)	3.0(3+)	15.41	2.63	131	76	0	0	0	0	Ⅲ	0
1069	F	58	2020-05-14 11:30:07	MN	21.8	61.5	96.01	20(1+)	0.5(1+)	3.37	1.19	148	84	1 week	0	0	0	0	1
1070	F	48	2020-05-14 11:30:00	HSPN	38.5	114.4	49.24	250(3+)	1.0(2+)	29	0.94	112	72	2 years	0	0	0	Ⅲ	0
1071	M	58	2020-05-11 10:55:06	Renal Amyloidosis	16.1	91.5	79.22	20(1+)	2.0(2+)	6.7	7.94	133	99	0	0	0	0	0	1
1072	M	26	2020-05-11 10:54:57	MCD	46.8	61.5	130.57	-	3.0(3+)	0.81	0.12	125	87	0	0	0	0	0	0
1073	M	55	2020-05-11 10:54:46	MN	23.4	61.9	106.23	20(1+)	3.0(3+)	1.35	1.9	112	82	0	0	0	0	0	1
1074	M	70	2020-05-11 10:54:35	MCD	18.2	319.5	16.06	20(1+)	10(4+)	3.46	3.96	120	88	0	0	0	1	0	1
1075	M	44	2020-05-11 10:54:24	MN	15.5	61.8	114.84	50(2+)	10(4+)	21.64	6.9	127	89	0	0	1	0	0	1
1076	M	34	2020-05-07 10:37:24	DN	23.4	108.8	76.06	50(2+)	3.0(3+)	14.83	8.4	121	71	0	1 year	0	1	0	1
1077	M	65	2020-05-07 10:37:13	MN	20.7	105.9	63.21	10(+-)	3.0(3+)	19.89	3.39	102	60	0	0	0	1	0	1
1078	M	31	2020-04-29 10:51:09	IgA	48.5	96.9	89.36	250(3+)	10(4+)	153.34	0.76	114	70	0	0	0	1	0	0
1079	M	72	2020-04-27 10:53:34	MN	23.8	88.8	74.45	20(1+)	3.0(3+)	1.17	3.08	152	73	0	0	0	0	0	1
1080	F	65	2020-04-27 10:53:23	MN	29.9	280.8	96.34	50(2+)	10(4+)	0.94	5.95	124	70	0	0	0	0	0	1
1081	M	44	2020-04-27 10:52:57	MN	31.3	63.3	113.71	10(+-)	1.0(2+)	3.83	2.5	144	86	0	0	0	0	0	0
1082	F	45	2020-04-23 11:07:05	DN	29.5	95.8	61.89	20(1+)	3.0(3+)	3.33	5.95	107	60	0	10 years	0	0	Ⅱ	0
1083	M	48	2020-04-23 11:06:51	DN	25.7	152.5	45.83	20(1+)	3.0(3+)	6.08	3.05	133	69	5 days	3 years	0	0	Ⅲ	0
1084	M	35	2020-04-23 11:06:35	IgA	40.2	68.5	117.26	250(3+)	0.3(1+)	73.71	0.74	142	98	1 month	0	0	0	0	0
1085	M	51	2020-04-20 10:46:27	MN	20.7	64.3	107.56	50(2+)	10(4+)	11.32	11.53	125	84	0	0	0	0	0	1
1086	M	41	2020-04-20 10:46:14	Hypertensive Renal Disease	44	224.2	30.21	-	0.3(1+)	0.22	0.82	121	74	1 month	0	0	0	Ⅲ	0
1087	F	67	2020-04-16 10:27:49	MN	31.2	40.3	103.57	50(2+)	10(4+)	9.07	3.64	133	81	3 years	0	0	0	0	1
1088	M	48	2020-04-13 10:56:50	IgA	36.3	88.1	88.97	250(3+)	1.0(2+)	124.74	1.56	102	66	6 years	0	0	0	Ⅱ	0
1089	M	43	2020-04-13 10:56:33	MN	21	90.3	89.44	50(2+)	3.0(3+)	37.78	13.12	156	79	0	0	0	0	0	1
1090	F	70	2020-04-09 10:56:03	MN	17.9	58.6	89.66	50(2+)	10(4+)	9.47	6.84	149	72	0	0	0	0	0	1
1091	M	71	2020-04-09 10:55:54	MN	23.8	75.5	87.49	10(+-)	1.0(2+)	2.63	3.83	141	72	3 years	0	0	0	0	1
1092	M	52	2020-04-02 10:16:36	FSGS	25.2	153.8	44.42	250(3+)	3.0(3+)	184.46	5.4	162	109	5 days	0	0	0	Ⅲ	1
1093	M	20	2020-03-30 12:09:11	MCD	15.8	69.7	129.37	20(1+)	10(4+)	2.12	10.09	120	58	0	0	0	0	0	1
1094	F	46	2020-03-30 12:09:01	MN	26.1	33.7	127.31	10(+-)	3.0(3+)	2.92	2.24	135	70	0	0	0	0	0	1
1095	M	39	2020-03-30 12:08:52	MN	23.6	85.1	98.83	20(1+)	3.0(3+)	5.11	6.52	140	85	0	0	0	0	0	1
1096	F	32	2020-03-26 10:57:00	MCD	21	44.1	128.57	20(1+)	10(4+)	6.73	4.01	113	59	0	0	0	0	0	1
1097	F	71	2020-03-26 10:56:45	MN	22.1	154.2	29	20(1+)	10(4+)	3.37	3.51	187	90	10 years	0	0	0	Ⅳ	1
1098	M	38	2020-03-23 10:56:53	Immune kidney disease	29.9	56	122.99	-	0.15(+-)	0.74	3.05	116	65	0	0	0	0	0	0
1099	M	61	2020-03-23 10:38:46	MN	16	71.6	95.93	10(+-)	10(4+)	0.5	7.54	151	106	0	0	0	0	0	1
1100	F	45	2020-03-23 10:38:37	FSGS	36.3	117.3	48.45	250(3+)	-	73.31	0.12	132	91	1 month	0	0	0	Ⅲ	0
1101	F	62	2020-03-19 11:44:02	FSGS	37.6	178.7	25.85	250(3+)	0.3(1+)	3.49	0.7	151	100	20 years	0	0	0	Ⅳ	0
1102	M	73	2020-03-19 10:29:34	MN	18.6	76.7	85.71	50(2+)	3.0(3+)	27.99	3.47	132	79	0	0	0	0	0	1
1103	F	80	2020-03-16 11:19:39	MN	31.64	44.1555	81.53	-	1.0(2+)	1.39	0.44	151	79	40 years	0	0	0	0	0
1104	M	53	2020-03-16 11:19:18	Renal Amyloidosis	21.7	77.3	98.33	10(+-)	10(4+)	0.59	7.54	112	59	0	0	0	0	Ⅱ	1
1105	M	56	2020-03-12 11:17:32	MN	29.2	75.7	97.11	10(+-)	3.0(3+)	5.49	3.63	150	91	2 months	0	0	0	0	1
1106	F	30	2020-03-12 11:16:51	LN	24.2	203.3	27.69	250(3+)	1.0(2+)	467.5	1.8	114	76	0	0	0	1	0	1
1107	M	37	2020-03-09 11:05:10	FSGS	30.3	562.8	10.21	20(1+)	1.0(2+)	0.68	2.6	149	89	First found	0	0	0	Ⅴ	0
1108	M	29	2020-03-09 11:04:52	LN	25.9	127.3	65.16	250(3+)	1.0(2+)	89.55	1.16	147	104	First found	0	0	1	0	1
1109	F	29	2020-03-05 11:41:11	Endocapillary proliferative glomerulonephritis	25.3	49.7	126.24	250(3+)	10(4+)	81.41	3.05	128	109	First found	0	0	0	0	1
1110	M	72	2020-03-05 11:15:57	ANCA-associated glomerulonephritis	29.1	128	47.85	250(3+)	1.0(2+)	41.04	1.14	132	75	20 years	0	0	1	0	0
1111	M	70	2020-03-02 16:09:36	MN	26.8	94.1	70.39	-	3.0（3+）	1	5.8	135	62	20 years	20 years	0	1	0	1
1112	M	39	2020-03-02 16:09:12	Hypertensive Renal Disease	30.8	903.5	5.68	-	1.0(2+)	0.2	2.82	184	102	7 years	2 years	0	0	Ⅴ	0
1113	F	21	2020-02-18 11:06:11	Crescentic glomerulonephritis	24.6	862.5	5.14	250(3+)	3.0(3+)	128.05	3.37	126	75	8 days	0	0	0	Ⅴ	0
1114	F	51	2020-01-20 11:39:12	MN	24.3	51.5	106.91	-	1.0（2+）	1	1.73	127	104	0	0	0	0	0	1
1115	M	47	2020-01-20 11:38:56	ANCA-associated glomerulonephritis	32.3	486.7	31.71	50(2+)	-	3.15	0.29	146	80	0	0	0	1	0	0
1116	M	29	2020-01-20 11:18:27	MN	31.6	62.5	127.01	-	3.0(3+)	2.34	1.05	127	85	1 year	0	0	0	0	0
1117	M	65	2020-01-20 10:53:28	MCD	16.8	145.9	42.91	20(1+)	10(4+)	2.07	0.31	168	102	0	0	0	0	0	1
1118	M	42	2020-01-20 10:53:21	IgA	13.8	65	114.07	250(3+)	3.0(3+)	31.39	1.98	140	80	0	0	0	0	0	1
1119	M	44	2020-01-16 10:55:11	IgA	31.64	70.6488	81.53	-	-	1	3.05	147	96	10 years	0	0	0	0	0
1120	M	30	2020-01-16 10:54:55	IgA	38.1	65.8	123.48	250(3+)	1.0(2+)	57.46	1.8	122	64	0	0	0	0	0	0
1121	M	44	2020-01-13 11:16:52	DN	18.8	74.6	106.29	10(+-)	3.0(3+)	4.88	5.86	146	98	10 years	8 months	0	0	Ⅳ	1
1122	M	29	2020-01-09 11:44:43	IgA	42.7	69.4	121.66	20(1+)	1.0(2+)	9.25	0.46	117	77	0	0	0	0	0	0
1123	F	57	2020-01-09 11:44:31	TIN	39.4	269.3	16.3	-	0.15(+-)	0.34	0.24	102	70	2 years	0	0	1	0	0
1124	F	28	2020-01-09 11:44:19	IgA	40.3	51.8	125.41	50(2+)	0.2(+-)	57.08	3.05	120	70	0	0	0	0	0	0
1125	M	48	2020-01-06 11:27:25	Alport syndrome	37.1	115.3	64.26	-	0.15(+-)	0.29	0.45	130	78	0	0	0	0	Ⅱ	0
1126	F	67	2020-01-06 11:27:16	MN	23.7	82.7	63.34	50(2+)	0.3(1+)	6.59	0.68	153	88	0	0	0	0	0	1
1127	M	26	2020-01-06 11:27:06	Lipoprotein nephropathy	22.6	88.7	102.99	50(2+)	10(4+)	28.04	0.93	177	94	First found	0	0	0	0	1
1128	F	57	2020-01-02 12:08:33	DN	34.6	296.2	14.53	-	3.0(3+)	0.81	0.89	158	78	30 years	10 years	0	0	Ⅴ	0
1129	M	49	2020-01-02 12:08:26	IgA	40.7	79.1	100.18	250(3+)	0.15(+-)	80.33	0.23	134	95	6 years	0	0	0	0	0
1130	M	27	2020-01-02 12:08:19	IgA	33	85.8	106.46	250(3+)	1.0(2+)	41.02	2.12	122	68	0	0	0	0	0	0
1131	F	31	2020-01-02 12:08:11	IgA	48.2	53.7	121.35	250(3+)	0.3(1+)	98.23	0.44	111	72	0	0	0	0	0	0
1132	F	50	2019-12-30 10:48:07	IgA	39.2	117.8	46.54	50(2+)	1.0(2+)	5.4	1.18	124	87	5 years	0	0	0	Ⅲ	0
1133	F	53	2019-12-26 11:55:59	Immune kidney disease	30.9	96.4	58.06	250(3+)	3.0(3+)	62.06	3.81	144	82	20 days	0	0	0	Ⅲ	0
1134	M	71	2019-12-26 11:45:35	Renal lesion associated with malignant tumor	29.8	82.8	81.59	-	-	0.22	0.01	92	63	0	0	0	0	0	1
1135	M	62	2019-12-26 11:45:26	MN	19.8	63.3	100.2	10(+-)	3.0(3+)	4.43	10.64	123	70	0	0	0	0	0	1
1136	M	41	2019-12-26 11:45:16	Crescentic glomerulonephritis	29.5	1195.8	3.99	-	-	1	3.05	146	105	half a month	0	0	1	0	0
1137	F	62	2019-12-26 11:45:03	MCD	16.9	77.8	70.63	20(1+)	10(4+)	9	3.05	129	79	0	0	0	0	0	1
1138	M	37	2019-12-23 10:55:40	IgA	48.5	118.5	67.17	10(+-)	0.3(1+)	5.33	0.18	172	112	First found	0	0	1	Ⅱ	0
1139	F	40	2019-12-23 10:55:28	IgA	34.6	79.4	80.43	250(3+)	1.0(2+)	50.96	1.63	135	86	0	0	0	0	0	0
1140	M	15	2019-12-19 10:56:06	TIN	28.4	546	13.7363	50(2+)	0.3(1+)	3.1	0.2	155	99	1 week	0	0	1	0	0
1141	M	22	2019-12-19 10:55:56	IgA	39.8	87.3	107.98	50(2+)	0.7(1+)	42.43	0.89	141	98	0	0	0	0	0	0
1142	M	53	2019-12-16 12:06:10	MN	21.8	21.8	90.6	10(+-)	10(4+)	6.8	12.31	121	86	10 years	0	0	0	0	1
1143	F	53	2019-12-16 12:06:01	TIN	41.5	1047.2	3.25	20(1+)	0.3(1+)	0.77	3.05	123	83	1 year	0	0	1	0	0
1144	M	58	2019-12-16 12:05:52	DN	25.1	181.3	34.66	20(1+)	3.0(3+)	1.04	6.91	134	74	4 years	21 year	0	0	Ⅲ	0
1145	F	41	2019-12-16 12:05:43	IgA	37	84.5	74.08	250(3+)	0.3(1+)	6.75	0.57	127	77	1 year	0	0	0	Ⅱ	0
1146	F	30	2019-12-16 12:05:29	DN	35.1	315.1	16.3	10(+-)	1.0(2+)	1.55	3.05	154	83	6 years	20 years	0	0	Ⅳ	0
1147	F	38	2019-12-12 12:28:37	TIN	26.1	397.5	12.31	50(2+)	1.0(2+)	67.19	0.49	146	90	First found	0	0	1	0	0
1148	M	33	2019-12-12 12:28:26	MCD	46.7	78.7	112.33	-	0.15(+-)	0.92	0.17	124	67	0	0	0	0	0	0
1149	M	28	2019-12-12 12:28:17	MsPGN	37.5	79.8	115.68	50(2+)	1.0(2+)	26.6	1.93	156	83	6 years	0	0	0	0	0
1150	M	69	2019-12-12 12:28:08	ANCA-associated glomerulonephritis	26.6	419.7	11.63	250(3+)	0.3(1+)	19.76	3.05	140	72	0	0	1	0	Ⅴ	0
1151	M	52	2019-12-12 12:27:58	MN	20	69.9	103.2	250(3+)	1.0(2+)	508.88	2.55	117	71	0	0	0	0	0	1
1152	F	58	2019-12-12 12:27:46	ANCA-associated glomerulonephritis	36.7	224.6	20.16	250(3+)	1.0(2+)	3.91	1.58	179	80	2 years	0	0	0	Ⅳ	0
1153	M	46	2019-12-12 12:27:36	MsPGN	35.1	83.3	96.55	10(+-)	1.0(2+)	0.76	3.28	151	89	15 years	0	0	0	0	0
1154	F	53	2019-12-05 11:02:35	MN	21.3	41	113.63	10(+-)	3.0(3+)	4.7	4.9	126	78	0	0	0	0	0	1
1155	F	49	2019-12-05 10:51:44	MN	36.5	51	108.77	50(2+)	1.0(2+)	8.98	0.76	121	74	10 years	0	0	0	0	0
1156	F	62	2019-12-05 10:51:29	MN	37.1	44.1	104.14	50(2+)	1.0(2+)	25.09	0.29	119	68	0	10 years	0	0	0	0
1157	F	31	2019-12-05 10:51:19	MN	28.8	48.9	125.15	50(2+)	1.0(2+)	13.9	0.94	118	56	0	0	0	0	0	0
1158	F	57	2019-12-02 11:06:02	DN	33	104.9	50.97	10(+-)	3.0(3+)	0.72	2.42	142	65	1 year	10 years	0	0	Ⅱ	0
1159	M	53	2019-11-28 10:17:32	DN	34.3	283	20.95	50(2+)	1.0(2+)	14.71	3.09	174	75	4 months	7 years	0	0	Ⅳ	0
1160	F	46	2019-11-28 10:17:18	IgA	39.3	68.4	92.35	50(2+)	0.5(1+)	2.16	0.18	117	65	0	0	0	0	Ⅰ	0
1161	F	30	2019-11-28 10:16:59	DN	25.6	47	127.68	50(2+)	3.0(3+)	32.44	2.51	153	87	1 year	12 years	0	0	0	1
1162	M	59	2019-11-25 11:53:45	DN	25.6	89.9	80.37	20(1+)	1.0(2+)	1.28	1.35	158	96	First found	8 years	0	0	0	0
1163	F	48	2019-11-25 11:53:35	IgA	45.4	55.5	106.53	50(2+)	0.3(1+)	6.01	3.05	115	62	7 years	0	0	0	0	0
1164	F	32	2019-11-25 11:53:24	LN	32.1	24.3	130.65	20(1+)	1.0(2+)	1.58	3.05	113	75	0	0	0	0	0	0
1165	F	30	2019-11-21 11:46:15	LN	26.7	106.1	60.78	10.0(3+)	2.0(2+)	21.15	3.22	101	61	0	0	0	0	Ⅱ	0
1166	M	45	2019-11-21 11:46:06	IgA	39	94.8	83.16	250(3+)	0.3(1+)	103.9	0.68	108	63	0	0	1	0	0	0
1167	F	68	2019-11-21 11:45:53	MCD	35.1	48.3	96.9	-	0.3(1+)	3.46	0.12	151	87	0	0	0	0	0	0
1168	M	37	2019-11-21 11:45:40	MPGN	23.7	85.3	99.95	250(3+)	3.0(3+)	42.21	11.54	127	78	0	0	0	0	0	1
1169	M	51	2019-11-21 11:45:32	DN	33.8	132.8	53.04	10(+-)	3.0(3+)	4.88	3.39	172	100	1 week	20 years	0	0	Ⅲ	0
1170	M	45	2019-11-21 11:45:18	MN	21.5	73.4	106.25	250(3+)	2.0(2+)	24.62	1.29	155	94	First found	0	0	0	0	1
1171	M	41	2019-11-21 11:45:07	IgA	36.5	81.7	102.38	250(3+)	0.3(1+)	60.14	0.79	111	70	0	0	0	0	0	0
1172	M	65	2019-11-18 11:01:01	MN	28.5	100.4	67.42	10(+-)	3.0(3+)	3.1	5.74	123	72	0	0	0	0	0	0
1173	M	57	2019-11-18 11:00:51	DN	27.6	155.7	41.96	10(+-)	3.0(3+)	2.34	4.22	148	89	5 years	10 years	0	0	Ⅲ	0
1174	F	29	2019-11-14 10:25:19	DN	22.9	171.3	34.3	50(2+)	10(4+)	10.35	9.87	144	89	0	7 years	0	0	Ⅲ	1
1175	M	60	2019-11-11 11:27:04	MN	29.1	65.6	100.14	10(4+)	50(2+)	3.15	3.82	124	84	4 years	0	0	0	0	1
1176	F	56	2019-11-11 11:26:54	IgA	41.2	50.7	103.75	250(3+)	3.0(3+)	57.74	1.3	107	75	10 years	0	0	0	0	0
1177	M	49	2019-11-11 11:26:46	IgA	25.9	102.2	73.83	50(2+)	3.0(3+)	31.36	4.51	135	86	4 years	0	0	0	0	1
1178	M	24	2019-11-11 11:26:34	IgA	43.4	63.9	130.35	50(2+)	1.0(2+)	20.27	1	140	89	0	0	0	0	0	0
1179	M	21	2019-11-07 10:49:01	TIN	42	225.6	34.51	-	-	1.37	0.05	120	70	0	0	0	0	Ⅲ	0
1180	M	75	2019-11-07 10:48:53	IgA	38.3	152	38.06	50(2+)	1.0(2+)	12.2	1.2	120	64	10 years	5 years	0	0	Ⅲ	0
1181	F	61	2019-11-07 10:48:43	IgA	45.5	42.2	106.4	250(3+)	0.3(1+)	120.19	3.05	142	86	First found	0	0	0	0	0
1182	F	73	2019-11-07 10:48:34	ANCA-associated glomerulonephritis	29.2	233.7	17.3	250(3+)	1.0(2+)	28.49	3.05	130	68	50 years	First found	0	0	Ⅳ	0
1183	M	20	2019-11-04 11:27:45	IgA	49.7	79.4	122.62	-	0.15(+-)	0.59	0.15	125	71	0	0	0	0	0	0
1184	M	69	2019-10-31 11:34:40	MN	20.4	63.4	95.33	50(2+)	3.0(3+)	1.04	5.91	108	73	0	0	0	0	0	1
1185	M	60	2019-10-31 11:34:25	Hypertensive Renal Disease	31.4	168.2	37.42	10(+-)	1.0(2+)	0.32	1.88	115	81	12 years	0	0	0	Ⅲ	0
1186	M	76	2019-10-31 11:34:08	Renal Amyloidosis	20	92	69.36	10(+-)	3.0(3+)	5.8	6.2	87	57	0	0	0	0	0	1
1187	M	53	2019-10-31 11:33:52	TIN	40.7	254.2	23.86	-	0.3(1+)	0.54	0.26	143	88	First found	0	0	1	0	0
1188	M	46	2019-10-28 11:00:21	DN	39.7	85.7	93.29	250(3+)	3.0(3+)	20.5	1.72	131	86	5 years	0	0	0	0	0
1189	F	27	2019-10-28 11:00:07	LN	22.7	130.8	48.19	250(3+)	3.0(3+)	18.05	5.93	124	84	First found	0	0	0	Ⅲ	1
1190	F	71	2019-10-28 10:59:56	MN	24.3	57.8	89.43	50(2+)	3.0(3+)	15.39	2.19	136	88	5 months	0	0	0	0	1
1191	F	48	2019-10-24 11:34:01	DN	26.6	128.7	42.41	0.03(+-)	3.0(3+)	2.75	8.06	186	96	2 years	5 years	0	0	Ⅳ	0
1192	M	35	2019-10-24 11:33:50	Obesity-related glomerulopathy	43.5	60.5	123.4	-	1.0(2+)	0.77	0.75	141	85	0	First found	0	0	0	0
1193	F	41	2019-10-24 11:33:32	MCD	17.1	83.6	75.04	250(3+)	10(4+)	14.13	7.01	96	79	0	0	0	0	0	1
1194	M	44	2019-10-24 11:33:17	IgA	35	105.2	73.84	0.15(2+)	1.0(2+)	50.87	1.22	132	89	1 week	0	0	0	Ⅱ	0
1195	M	77	2019-10-17 11:37:52	DN	30.1	81.7	93.08	0.06(1+)	3.0(3+)	2.83	1.59	152	72	8 years	21 year	0	0	0	1
1196	M	31	2019-10-17 11:37:40	IgA	46	69.2	120.1	-	0.3(1+)	1.8	0.44	154	83	5 months	0	0	0	0	0
1197	F	72	2019-10-17 11:37:25	ANCA-associated glomerulonephritis	30.5	874.9	3.53	0.75(3+)	1.0(2+)	435.06	1.04	154	89	20 years	12 years	0	0	Ⅴ	0
1198	M	63	2019-10-17 11:37:08	MN	27	81.2	88.37	0.06(1+)	2.0(2+)	5.29	4.09	168	108	First found	0	0	0	0	0
1199	F	60	2019-10-17 11:36:57	Nephropathy associated with Sjogren's syndrome	31.1	154.9	31.16	0.15(2+)	0.3(1+)	14.71	0.21	97	58	0	0	0	0	Ⅲ	0
1200	F	43	2019-10-14 11:41:59	IgA	31	104.9	56.24	0.75(3+)	1.0(2+)	3.56	1.52	121	85	0	0	0	0	Ⅲ	0
1201	F	21	2019-10-14 11:41:48	IgA	38.5	47.4	135.64	0.75(3+)	1.0(2+)	209.12	0.23	97	60	0	0	0	0	0	0
1202	M	62	2019-10-10 10:58:29	MN	19.1	92.7	75.83	0.03(+-)	10(4+)	5.47	7.18	136	68	0	0	0	0	0	1
1203	M	29	2019-10-10 10:58:19	MCD	16.7	86.5	103.95	0.15(2+)	10(4+)	3.17	3.05	124	95	0	0	0	0	0	1
1204	F	50	2019-09-29 11:01:59	MN	25.5	55.7	104.92	0.03(+-)	0.3(1+)	0.83	1.32	96	58	0	0	0	0	0	1
1205	F	55	2019-09-29 11:01:50	MCD	29	76.8	75.36	0.06(1+)	0.3(1+)	6.73	0.37	114	74	0	0	0	0	0	0
1206	M	62	2019-09-26 10:58:13	MN	29	94.8	79.65	0.06(1+)	3.0(3+)	5.58	3.05	103	72	0	0	1	0	0	1
1207	F	48	2019-09-26 10:58:05	IgA	38	191.7	26.2	0.75(3+)	0.15(+-)	93.53	0.56	133	72	2 years	2 years	0	0	Ⅳ	0
1208	M	61	2019-09-23 11:59:25	multiple myeloma related nephropathy	42.5	187.9	32.5	-	-	0.16	0.32	137	87	0	10 days	0	1	0	0
1209	M	48	2019-09-23 11:59:15	MN	16.5	98.6	77.65	0.03(+-)	10(4+)	43.09	8.77	123	91	0	0	0	0	Ⅱ	1
1210	M	68	2019-09-23 11:59:05	MN	18.1	67.2	93.74	0.03(+-)	10(4+)	1.73	4.39	133	74	0	0	0	0	0	1
1211	F	21	2019-09-23 11:58:52	IgA	43.5	48	135.08	0.15(2+)	0.3(1+)	166.61	0.12	115	84	0	0	0	0	0	0
1212	M	34	2019-09-19 11:16:46	Hypertensive Renal Disease	40.3	90.5	95.03	-	0.3(1+)	0.2	0.18	130	91	3 years	0	0	0	0	0
1213	M	67	2019-09-16 10:43:09	IgA	23.1	74.7	90.38	0.15(2+)	3.0(3+)	0.65	3.96	144	94	First found	0	0	0	0	1
1214	F	29	2019-09-11 12:01:09	LN	22.7	124.1	50.64	0.15(2+)	3.0(3+)	396.5	7.91	178	105	2 months	0	0	0	Ⅲ	1
1215	M	17	2019-09-09 11:02:28	MCD	45.7	66.4	111.145	-	0.7(1+)	1.31	0.11	129	84	0	0	0	0	0	0
1216	M	54	2019-09-09 11:02:18	MCD	20.5	65.6	104.45	-	10(4+)	0.27	6.95	110	75	0	0	0	0	0	1
1217	M	53	2019-09-05 10:57:57	MCD	26	77.3	98.33	0.15(2+)	3.0(3+)	1.65	2.48	142	81	1 year	0	0	0	0	1
1218	M	42	2019-09-05 10:57:49	IgA	39.1	117.5	65.52	0.15(2+)	3.0(3+)	27.13	0.43	130	91	4 years	0	0	0	Ⅱ	1
1219	M	65	2019-09-05 10:57:42	Hypertensive Renal Disease	31.64	390.8	11.5148	-	-	0.52	0.16	154	50	20 years	0	0	1	0	0
1220	M	73	2019-09-05 10:57:35	Hypertensive Renal Disease	40.3	172.9	33.03	0.75(3+)	-	18	0.26	147	76	3 years	0	0	0	Ⅲ	0
1221	F	34	2019-09-05 10:57:25	FSGS	32.1	263.7	19.66	-	3.0(3+)	0.77	3.17	167	114	4 months	0	0	0	Ⅳ	0
1222	F	43	2019-09-02 10:58:15	IgA	37.9	54.6	110.93	0.15(2+)	1.0(2+)	0.58	0.82	121	87	0	0	0	0	0	0
1223	F	63	2019-09-02 10:50:33	DN	26.9	103.7	49.55	0.15(2+)	10(4+)	1.91	7.55	158	66	0	20 years	0	0	0	1
1224	F	38	2019-08-29 11:52:34	TIN	36.4	210.7	25.07	-	-	0.09	0.25	103	73	0	0	0	0	Ⅳ	1
1225	M	28	2019-08-29 11:52:25	IgA	36.1	135.8	60.68	0.06(1+)	3.0(3+)	9.54	2.52	138	85	2 weeks	0	0	0	0	0
1226	M	68	2019-08-29 11:52:17	Nephropathy associated with Sjogren's syndrome	22.5	460.4	10.47	0.15(2+)	10(4+)	8.06	2.52	155	79	7 years	0	0	1	0	1
1227	M	64	2019-08-29 11:52:11	MN	23.3	103.9	65.14	0.06(1+)	3.0(3+)	2.86	2.67	130	73	0	First found	0	0	0	1
1228	M	59	2019-08-29 11:51:57	MCD	21.8	70.6	98.41	0.03(+-)	10(4+)	5.42	5.89	97	52	0	0	0	0	0	1
1229	M	66	2019-08-26 11:01:17	ANCA-associated glomerulonephritis	29.3	357.9	14.4	0.15(2+)	3.0(3+)	28.8	1.02	132	77	0	0	0	0	0	0
1230	F	22	2019-08-22 10:46:52	LN	21.4	41.4	140.82	0.03(+-)	10(4+)	1.93	3.36	104	51	0	0	0	0	0	1
1231	F	50	2019-08-22 10:46:40	IgA	37.8	69.1	88.69	0.75(3+)	0.3(1+)	245.34	0.18	130	80	0	0	0	0	0	0
1232	M	14	2019-08-22 10:46:30	MCD	35.4	117	64.6154	0.06(1+)	10(4+)	4.3	8.04	116	66	0	0	0	1	0	1
1233	F	32	2019-08-22 10:46:19	LN	26.1	89.1	74.02	0.75(3+)	3.0(3+)	2.83	1.83	111	63	0	0	0	0	Ⅱ	1
1234	F	29	2019-08-19 11:13:41	IgA	37.6	79.3	87.03	-	3.0（3+）	54.76	3.05	105	75	0	0	0	0	0	0
1235	M	63	2019-08-19 11:13:31	Alport syndrome	56.2	111.1	60.49	-	10（4+）	1.35	3.26	182	118	2 years	0	0	0	Ⅲ	0
1236	F	53	2019-08-15 11:30:31	MN	58.1	47.8	108.03	0.06（1+）	1.0（2+）	6.61	1.01	117	80	1 month	0	0	0	0	0
1237	F	30	2019-08-15 11:30:21	IgA	43.6	61.6	116.81	0.15（2+）	1.0（2+）	11.16	3.05	136	74	0	0	0	0	0	0
1238	M	42	2019-08-15 11:30:12	HSPN	37.6	85	96.91	0.15（2+）	1.0（2+）	28.87	0.45	133	80	0	0	0	0	0	0
1239	M	29	2019-08-15 11:30:00	Hypertensive Renal Disease	38.8	220.3	33.57	0.06（1+）	2.0（2+）	4.7	3.35	184	102	First found	0	0	0	0	0
1240	M	42	2019-08-15 11:29:49	MCD	22.1	57	120.4	0.03（+-）	3.0（3+）	4.9	1.5	144	76	0	0	0	0	0	1
1241	M	50	2019-08-08 11:29:52	IgA	37.4	107.1	89.28	0.03（+-）	3.0（3+）	2.68	3.68	131	98	20 years	0	0	0	Ⅲ	0
1242	M	51	2019-08-08 11:29:40	MCD	31.4	78.3	99.19	0.15(2+)	3.0(3+)	8.3	2.46	123	91	2 years	0	0	0	0	0
1243	M	63	2019-08-08 11:29:31	FSGS	35.2	271.8	20.51	0.75(3+)	0.3(1+)	37.71	1.28	123	79	0	0	0	0	Ⅳ	0
1244	F	48	2019-08-05 11:25:53	IgA	46.2	91.4	64.14	0.03(+-)	0.3(1+)	0.45	0.34	133	98	0	0	0	0	0	0
1245	M	71	2019-08-05 11:24:35	MN	25.8	57.4	97.92	0.15(2+)	6.0(3+)	1.22	2.31	104	72	2 years	0	0	0	0	1
1246	F	40	2019-08-01 11:41:58	Alport syndrome	37.7	46.3	119.61	-	-	0.32	3.05	107	73	0	0	0	0	0	0
1247	F	42	2019-08-01 11:25:47	IgA	31.1	142.3	39.17	0.75(3+)	3.0(3+)	16.74	8.05	156	94	First found	0	0	0	Ⅲ	0
1248	F	55	2019-08-01 11:25:27	Endocapillary proliferative glomerulonephritis	37.7	96.5	57.18	0.15(2+)	1.0(2+)	23.63	0.75	142	82	3 years	0	0	0	Ⅲ	0
1249	M	74	2019-07-29 11:32:26	MN	15.4	62.1	92.83	0.75(3+)	10(4+)	48.83	3.05	145	75	7 months	0	0	0	0	1
1250	M	27	2019-07-29 11:32:15	Hypertensive Renal Disease	37.7	203.3	37.52	-	0.3(1+)	13	0.52	133	88	First found	0	0	0	Ⅳ	0
1251	M	22	2019-07-25 12:44:27	MCD	17.3	71.7	126.09	0.06（1+）	3.0(3+)	1.05	1.6	129	80	First found	0	0	1	0	1
1252	M	64	2019-07-25 12:44:07	MN	31.64	55.5	103.56	0.06（1+）	10(4+)	21.92	3.05	136	72	10 years	0	0	0	0	1
1253	M	56	2019-07-25 12:13:21	HBVN	23.1	99.4	72.69	0.06(1+)	10(4+)	4.82	6	127	77	0	0	0	0	0	1
1254	M	42	2019-07-25 12:03:00	MCD	44.2	72.5	109.06	0.15(2+)	1.0(2+)	0.49	3.05	105	65	0	0	0	0	0	0
1255	M	26	2019-07-25 12:02:48	HBVN	40.2	79.8	117.32	0.15(2+)	1.0(2+)	14.6	0.93	145	85	0	0	0	0	0	0
1256	M	27	2019-07-25 11:29:08	MN	28.2	69.4	123.38	0.15(2+)	3.0(3+)	14.56	7.56	122	78	0	0	0	0	0	1
1257	M	66	2019-07-25 11:09:53	MN	29.1	133.6	47.39	0.06(1+)	10(4+)	3.96	4.28	197	144	0	0	0	0	Ⅲ	1
1258	M	22	2019-07-22 11:13:57	FSGS	44.7	103.2	88.21	-	1.0(2+)	3	0.9	133	100	First found	0	0	0	Ⅱ	0
1259	F	27	2019-07-18 11:24:14	MCD	42.4	72.2	98.86	-	-	0.41	3.05	125	73	0	0	0	0	Ⅱ	0
1260	F	35	2019-07-18 11:24:04	IgA	56.6	93.4	68.46	0.75(3+)	1.0(2+)	166.37	1.37	125	79	0	0	0	0	0	0
1261	F	15	2019-07-18 10:46:11	ANCA-associated glomerulonephritis	35	70.2	106.838	0.15(2+)	0.3(1+)	23.85	0.13	98	60	0	0	0	0	0	0
1262	M	42	2019-07-15 12:07:44	IgA	44.2	107.7	72.79	0.15(2+)	0.3(1+)	2.32	0.78	155	92	3 months	0	0	0	0	0
1263	F	79	2019-07-15 12:07:36	MN	27.2	64.4	78.78	0.03(+-)	3.0(3+)	3.35	3.05	163	80	10 years	7 years	0	0	0	0
1264	M	59	2019-07-15 12:07:27	MN	21.9	94.1	76.05	0.15(2+)	3.0(3+)	14.06	3.46	130	86	0	0	0	0	0	1
1265	M	45	2019-07-15 12:07:19	MN	37.7	82	99.1	0.15(2+)	10(4+)	41	11.26	155	78	0	0	0	0	0	1
1266	F	72	2019-07-11 11:00:30	FSGS	43.1	182.6	23.47	0.75(3+)	1.0(2+)	28.19	0.74	165	98	3 years	0	0	0	Ⅲ	0
1267	F	24	2019-07-08 10:36:07	LN	19.9	331.7	15.98	0.15(2+)	3.0(3+)	15.88	2.94	159	106	First found	0	0	1	0	1
1268	M	58	2019-07-04 11:38:09	MN	29.7	76.8	95.19	0.03(+-)	10.0(4+)	1.04	8.12	115	76	0	First found	0	0	Ⅲ	0
1269	M	33	2019-07-04 11:37:59	IgA	43.6	78.9	112.21	0.15(2+)	0.3(1+)	2.83	0.88	129	94	0	0	0	0	0	0
1270	F	67	2019-07-04 11:37:41	ANCA-associated glomerulonephritis	33.2	115.4	42.34	0.15(2+)	0.3(1+)	17.62	0.89	156	91	First found	0	0	0	Ⅲ	0
1271	F	66	2019-07-01 11:32:36	MN	29.8	44.4	101.03	0.15(2+)	1.0(2+)	30.62	5.55	130	80	0	0	0	0	0	1
1272	M	50	2019-07-01 11:32:25	LN	32	64.3	108.32	-	1.0(2+)	1.22	1.07	108	68	0	0	0	0	0	0
1273	F	29	2019-06-27 12:18:51	LN	23.4	43.3	132.1	0.03(+-)	1.0(2+)	6.93	3.05	112	83	0	0	0	0	0	0
1274	M	59	2019-06-27 12:18:41	LN	32.6	73.4	96.3	0.15(2+)	-	20.07	3.05	127	74	0	0	0	0	0	0
1275	M	60	2019-06-27 12:18:32	IgA	41.4	104.6	66.45	0.15(2+)	1.0(2+)	27.83	0.98	125	76	10 years	0	0	0	0	0
1276	F	53	2019-06-27 11:24:31	Renal lesion associated with malignant tumor	38.8	47.8	108.3	0.03(+-)	-	2.68	0.17	125	83	0	0	1	0	0	0
1277	M	21	2019-06-24 11:38:33	MCD	17.7	137	63.07	-	10(4+)	2.53	4.88	141	73	First found	0	0	1	0	1
1278	F	52	2019-06-24 11:38:20	MN	27.6	60.1	100.9	0.06(1+)	1.0(2+)	3.17	0.79	110	73	10 years	0	0	0	0	1
1279	F	39	2019-06-24 11:38:07	MCD	20.2	49.2	118.07	-	3.0(3+)	0.32	3.91	100	55	0	0	0	0	0	1
1280	F	48	2019-06-24 11:37:52	HBVN	27.2	39.9	118.75	0.06(1+)	3.0(3+)	9.27	3.05	117	85	0	0	0	0	0	1
1281	M	36	2019-06-20 11:46:12	TIN	35.6	197	36.59	0.15（2+）	10.0（4+）	5.17	4.3	134	90	0	0	0	0	0	1
1282	M	20	2019-06-20 11:45:57	Obesity-related glomerulopathy	47.6	52	145.92	0.03（+-）	1.0（2+）	2.34	1.06	120	92	First found	0	0	0	0	0
1283	M	58	2019-06-17 11:33:13	DN	47.3	111.4	62.45	0.03（+-）	3.0（3+）	8.28	3.22	130	85	3 years	20 years	0	0	Ⅲ	0
1284	M	64	2019-06-17 11:32:57	MN	42.3	73.9	92.71	0.06（1+）	3.0（3+）	2	6.7	125	79	0	0	0	0	0	1
1285	M	64	2019-06-17 11:32:42	MN	31.5	56.4	103.61	0.06（1+）	3.0（3+）	7.13	6.88	146	86	First found	0	0	0	0	1
1286	F	29	2019-06-17 11:28:55	LN	15.6	110.7	58.14	0.75（3+）	3.0（3+）	79.73	6.05	126	85	0	0	0	0	Ⅱ	1
1287	F	63	2019-06-13 11:39:54	DN	55.9	193.5	23.31	0.03（+-）	1.0（2+）	8.35	4.93	156	78	8 years	First found	0	0	Ⅲ	0
1288	M	61	2019-06-13 11:39:43	Collagentype Ⅲ glomerulonephroPathy	24.1	58.9	103.94	0.03(+-)	10.0(4+)	1.78	3.48	98	64	0	0	0	0	0	1
1289	F	55	2019-06-13 11:39:29	MN	30.8	56.3	100.94	0.75（3+）	3.0（3+）	353.04	5.62	140	95	0	0	0	0	0	1
1290	M	35	2019-06-10 11:33:59	DN	42.2	164.2	45.92	-	0.3(1+)	0.27	3.05	135	88	5 years	2 months	0	0	Ⅲ	0
1291	M	20	2019-06-10 11:33:47	MCD	18.5	74.7	125.73	-	3.0(3+)	0.2	4.64	140	72	0	0	0	0	0	1
1292	F	52	2019-06-10 11:33:27	MN	25.3	61.2	100.3	0.75(3+)	6.0(3+)	13.95	3.38	98	57	0	0	0	0	0	1
1293	M	17	2019-06-10 11:33:17	MCD	18.4	84.8	87.0283	0.03(+-)	10.0(4+)	1.49	3.9	121	74	0	0	0	0	0	1
1294	M	53	2019-06-05 11:40:47	MN	22.6	83.1	92.19	0.15（2+）	10.0(4+)	44.82	5.61	129	85	0	0	0	0	0	0
1295	M	34	2019-06-05 11:40:31	MN	25.5	62.8	122.38	0.06(1+)	3.0(3+)	6.66	4.93	150	92	0	0	0	0	0	1
1296	M	52	2019-06-05 11:40:07	MN	29.3	80.9	95.9	0.03(+-)	1.0(2+)	1.64	2.75	155	122	3 years	0	0	0	0	1
1297	M	56	2019-06-03 12:08:27	MN	32.5	156.3	42.06	0.15(2+)	1.0(2+)	13.1	3.05	145	95	1 year	0	0	0	Ⅲ	0
1298	F	33	2019-06-03 12:08:08	IgA	35.1	123	49.77	0.06(1+)	1.0(2+)	1.62	0.49	136	85	0	0	0	0	Ⅲ	0
1299	M	83	2019-06-03 12:07:58	Renal Amyloidosis	22.5	99.3	60.21	0.15(2+)	3.0(3+)	24.82	3.01	104	70	0	0	1	0	0	1
1300	F	37	2019-06-03 12:07:48	LN	27.3	264.3	19.19	0.15(2+)	3.0(3+)	0.7	1.56	140	110	2 years	0	0	0	Ⅳ	1
1301	F	21	2019-06-03 12:07:40	LN	37	542.3	9.01	0.75(3+)	1.0(2+)	37.57	3.05	120	71	First found	0	0	0	Ⅴ	0
1302	M	24	2019-05-30 11:51:28	IgA	43.3	100.8	89.49	0.75(3+)	1.0(2+)	85.86	0.42	135	95	1 week	0	0	0	0	0
1303	F	65	2019-05-30 11:51:10	MN	23.4	125.9	38.65	0.06(1+)	3.0(3+)	4.41	6.79	146	76	10 years	0	0	0	0	1
1304	M	43	2019-05-30 11:50:58	MN	31.7	78.9	104.6	0.03(+-)	3.0(3+)	0.97	7.7	104	69	0	0	0	0	0	1
1305	M	36	2019-05-27 11:42:48	IgA	24.5	445.4	13.74	0.15(2+)	3.0(3+)	17.57	7.01	150	95	6 days	0	0	0	Ⅴ	1
1306	F	80	2019-05-27 11:42:39	MCD	19.3	63.3	79.87	0.03(+-)	10.0(4+)	6.82	3.05	123	79	0	0	0	0	0	1
1307	M	51	2019-05-27 11:42:20	Endocapillary proliferative glomerulonephritis	19.3	138.8	50.28	0.75(3+)	3.0(3+)	15.37	3.05	145	102	3 years	0	0	0	Ⅲ	1
1308	M	38	2019-05-27 11:42:09	MN	18.3	48.4	132.44	0.15(2+)	3.0(3+)	25.52	6.76	124	78	0	0	0	0	0	1
1309	M	35	2019-05-16 11:52:06	IgA	36.4	149.6	51.39	0.06(1+)	1.0(2+)	11.25	1.51	130	86	0	0	0	0	Ⅲ	0
1310	F	33	2019-05-13 14:19:14	FSGS	32.7	173.9	32.75	0.75(3+)	1.0(2+)	54.05	2.46	120	80	2 weeks	0	0	0	Ⅳ	0
1311	F	60	2019-05-13 14:18:59	MCD	30.3	47.6	98.05	0.03(+-)	3.0(3+)	1.42	3.05	145	75	2 years	0	0	0	0	1
1312	F	57	2019-05-09 11:47:31	IgA	47.3	84.1	66.58	0.15(2+)	0.15(+-)	1.24	0.3	118	74	1 year	0	0	0	0	0
1313	F	52	2019-05-09 11:47:19	MCD	16.5	60.1	100.9	0.15(2+)	10.0(4+)	5.02	8.29	128	97	0	0	0	0	0	1
1314	M	63	2019-05-09 11:47:00	MN	29.1	71	94.92	0.03(+-)	1.0(2+)	3.6	8.6	131	83	0	0	0	0	0	1
1315	F	50	2019-05-06 11:41:27	IgA	42.7	61.2	101.72	0.75(3+)	0.3(1+)	15.97	3.05	119	86	0	0	0	0	0	0
1316	M	65	2019-05-06 11:41:13	LN	28.8	360.9	14.35	50(2+)	1.0(2+)	67.72	3.05	165	100	7 days	0	0	0	Ⅴ	0
1317	M	53	2019-05-06 11:40:48	IgA	33	89.5	84.28	0.75(3+)	1.0(2+)	33.8	1.86	96	59	0	0	0	0	0	0
1318	M	29	2019-05-06 11:40:29	MN	41.2	63.6	126.1	0.03(+-)	1.0(2+)	3.08	0.87	122	78	0	0	0	0	0	0
1319	F	46	2019-04-29 12:06:35	MN	19.7	43.2	117.32	0.15(2+)	1.0(2+)	1.17	4.17	110	76	0	0	0	0	0	1
1320	M	24	2019-04-29 11:48:03	HSPN	36.1	96.6	94.24	0.75(3+)	1.0(2+)	127.37	1	111	75	0	0	0	0	0	0
1321	M	41	2019-04-25 11:28:45	MN	27.7	108.9	72.33	0.15(2+)	3.0(3+)	8.21	4.55	133	87	0	0	0	0	0	1
1322	F	51	2019-04-25 11:28:34	IgA	38.1	103.2	54.23	0.15（2+）	0.2（+-）	28.26	3.05	94	60	3 years	0	0	0	0	0
1323	M	47	2019-04-25 11:28:23	IgM	44.7	51.3	121.38	0.03（+-）	-	0.92	0.31	120	70	0	0	0	0	0	0
1324	M	40	2019-04-22 11:14:41	MN	20.6	56.6	122.45	0.15(2+)	3.0（3+）	8.5	1.97	96	62	0	0	0	0	0	1
1325	F	70	2019-04-22 11:14:22	ANCA-associated glomerulonephritis	31.7	528	6.59	250（3+）	0.3（1+）	55.66	0.88	122	82	0	0	0	1	0	0
1326	F	52	2019-04-18 11:50:18	DN	40.2	44.7	111.22	5.0(2+)	0.7(1+)	6.43	0.85	178	83	3 years	10 years	0	0	0	0
1327	F	42	2019-04-18 11:50:06	MsPGN	42	136.4	41.23	20（1+）	1.0（2+）	2.77	1.55	155	92	First found	0	0	0	Ⅲ	0
1328	F	49	2019-04-18 11:49:00	HBVN	28.7	59	103.68	50（2+）	3.0（3+）	6.3	2.65	131	75	First found	0	0	0	0	1
1329	M	48	2019-04-18 11:48:48	MsPGN	41.2	133.7	53.73	50（2+）	1.0（2+）	4.07	0.79	168	108	10 years	0	0	0	Ⅲ	0
1330	M	79	2019-04-18 11:48:33	MPGN	21.3	210.8	24.92	250（3+）	-	146.07	8.47	151	88	5 years	0	0	0	Ⅲ	1
1331	F	38	2019-04-15 11:49:13	IgA	38.8	91.8	68.44	50（2+）	1.0（2+）	15.39	1.78	133	90	First found	0	0	0	Ⅱ	0
1332	M	53	2019-04-15 11:48:59	Hypertensive Renal Disease	21.6	85.3	89.32	50（2+）	10.0（4+）	1.42	5.9	130	80	10 years	0	0	0	0	1
1333	M	70	2019-04-15 11:47:59	MN	20.4	309.1	16.71	20（1+）	3.0（3+）	2.48	7.58	128	86	2 years	10 years	1	0	0	1
1334	M	46	2019-04-15 11:03:30	MCD	29.9	35.8	141.72	-	-	0.7	3.05	97	63	0	0	0	0	0	0
1335	M	59	2019-04-11 11:41:20	DN	22	218.3	27.49	50（2+）	10.0（4+）	18.5	7.25	148	79	6 months	15 years	0	0	Ⅳ	0
1336	F	33	2019-04-11 11:10:50	IgA	48.7	60.8	114.87	10.0（3+）	0.1（+-）	151.22	0.25	117	75	0	0	0	0	0	0
1337	M	50	2019-04-11 11:10:39	MN	21.7	62.7	109.44	10（+-）	3.0（3+）	12.89	1.87	99	64	0	0	0	0	0	1
1338	F	19	2019-04-11 11:10:29	IgA	29.2	55.7	130.45	250（3+）	3.0（3+）	93.5	3.05	140	90	0	0	0	0	0	0
1339	M	43	2019-04-11 11:10:17	MN	40	76.9	105.71	-	1.0（2+）	0.34	0.6	128	83	0	0	0	0	0	0
1340	M	53	2019-04-08 10:58:12	MN	19.6	134.2	51.64	250（3+）	3.0（3+）	10.49	4.96	111	73	0	0	0	0	Ⅲ	1
1341	M	29	2019-04-04 11:11:40	MN	14	74	121.01	20（1+）	3.0（3+）	13.5	7.96	134	84	0	0	0	0	0	1
1342	M	56	2019-03-28 11:53:43	ANCA-associated glomerulonephritis	44.7	176.8	36.23	20(1+)	-	8.77	0.22	151	101	0	0	1	1	0	0
1343	F	23	2019-03-28 11:53:31	MN	29.2	51.2	130.4	20（1+）	3.0（3+）	3.71	3.38	115	85	0	0	0	0	0	0
1344	M	80	2019-03-28 11:52:08	Immune kidney disease	35.9	170.6	31.96	10（+-）	3.0（3+）	1.12	1.93	162	92	10 years	0	0	0	0	0
1345	F	65	2019-03-28 11:51:35	MN	28.1	45.3	101.07	50（2+）	3.0（3+）	6.66	3.08	143	81	1 year	0	0	0	0	1
1346	F	18	2019-03-25 12:11:21	LN	27.3	46.4	157.759	250（3+）	0.3（1+）	44.06	0.19	110	82	0	0	0	0	0	0
1347	F	15	2019-03-25 11:10:27	LN	42.1	299.8	25.0167	10（+-）	1.0（2+）	1.73	3.05	122	78	First found	0	0	0	Ⅴ	0
1348	F	29	2019-03-21 11:52:27	LN	33.9	43.2	132.2	10（+-）	-	0.92	0.52	118	77	0	0	0	0	0	0
1349	M	31	2019-03-21 11:52:06	IgA	39.4	103.4	82.61	50（2+）	3.0（3+）	5.24	6.38	150	100	First found	0	0	0	0	0
1350	M	49	2019-03-21 11:51:52	IgA	47.6	63.3	109.78	50(2+)	0.15(+-)	30.74	0.43	118	78	0	6 years	0	0	0	0
1351	M	14	2019-03-18 11:12:07	IgA	25	162.3	46.5804	250(3+)	3.0(3+)	1784.75	5.14	124	92	0	0	0	0	0	1
1352	F	29	2019-03-18 11:11:51	IgA	33.7	162.8	36.47	50(2+)	3.0(3+)	32.08	3.5	143	108	2 weeks	0	0	0	0	0
1353	F	30	2019-03-14 11:36:37	LN	18.4	118	53.45	250(3+)	3.0(3+)	58.45	4.01	130	90	0	0	0	0	0	1
1354	M	68	2019-03-14 11:33:02	MN	27.2	74.4	89.9	20(1+)	1.0(2+)	10.75	6.78	175	96	0	0	0	0	0	0
1355	F	49	2019-03-11 11:12:30	MN	36.5	50.1	109.41	20(1+)	1.0(2+)	9.95	0.48	144	98	4 months	0	0	0	0	0
1356	F	23	2019-03-11 11:12:14	IgA	38.3	60.4	123.5	50(2+)	0.3(1+)	15.25	0.51	118	85	0	0	0	0	0	0
1357	M	63	2019-03-07 11:46:17	DN	32.2	115.8	57.54	10(+-)	3.0(3+)	1.03	5.41	142	74	1 year	6 months	0	0	Ⅲ	0
1358	M	47	2019-03-07 11:46:03	IgM	13.8	98.6	78.19	20(1+)	10.0(4+)	0.85	9.74	119	79	0	0	1	0	0	0
1359	M	73	2019-03-07 11:45:51	MN	22.6	60.4	94.56	10(+-)	3.0(3+)	6.5	8.86	194	110	20 years	0	0	0	0	1
1360	M	22	2019-03-07 11:45:28	LN	16.8	72.2	125.73	50(2+)	3.0(3+)	9.97	3.05	138	77	First found	0	0	0	0	1
1361	F	48	2019-03-04 11:22:10	DN	27.8	174.1	29.43	50(2+)	3.0(3+)	3.37	3.51	141	83	6 months	4 years	0	0	0	1
1362	M	70	2019-02-28 11:30:20	MN	41.4	85.4	79.15	1.0(1+)	2.0(2+)	1.33	3.05	134	97	3 years	0	0	0	0	1
1363	M	29	2019-02-28 11:30:07	MCD	16	75.8	117.32	50(2+)	3.0(3+)	0.74	4.83	122	77	0	0	0	0	0	1
1364	M	62	2019-02-28 11:29:56	MN	18.2	115	58.43	10（+-）	2.0(2+)	6.86	5.46	133	92	0	0	0	0	0	1
1365	M	37	2019-02-28 11:29:41	MCD	15	108.7	74.56	20(1+)	10.0(4+)	3.02	4.58	129	95	0	0	0	0	0	1
1366	M	31	2019-02-25 12:00:17	IgA	33.6	193.9	38.63	50(2+)	1.0(2+)	4.91	2.22	150	79	1 year	0	0	0	Ⅲ	0
1367	F	60	2019-02-25 12:00:02	IgA	34.2	111.4	46.41	250(3+)	1.0(2+)	45.38	3.05	141	88	10 years	0	0	0	0	0
1368	F	56	2019-02-25 11:59:46	DN	30.6	128.2	40.28	-	3.0（3+）	0.92	3.05	167	97	20 days	3 years	0	0	0	1
1369	M	49	2019-02-21 11:28:28	MCD	21.3	79.9	99.76	10（+-）	3.0（3+）	0.58	3.07	121	74	0	0	0	0	0	1
1370	M	48	2019-02-21 11:28:17	MN	19.9	78.3	101.31	50（2+）	3.0（3+）	5	5.45	131	90	First found	0	0	0	0	1
1371	M	58	2019-02-18 10:58:58	DN	27.1	160.7	40.1	20（1+）	2.0（2+）	4.72	3.05	148	75	First found	First found	0	0	Ⅲ	1
1372	M	40	2019-02-14 11:41:18	MN	18.5	106.5	74.83	20（1+）	3.0（3+）	30.55	3.05	145	84	0	0	0	0	0	1
1373	M	56	2019-02-14 11:41:04	HBVN	25.9	65	77.5385	50（2+）	3.0（3+）	9.16	3.05	125	81	10 years	0	0	0	0	1
1374	M	33	2019-02-14 11:40:50	IgA	42.9	86	101.78	250（3+）	1.0（2+）	130.57	1.17	134	82	0	0	0	0	0	0
1375	M	61	2019-01-31 11:40:43	MN	23.7	58.1381	81.53	20（1+）	3.0（3+）	11.93	7.86	159	86	First found	0	0	0	0	1
1376	M	14	2019-01-31 11:40:31	FSGS	23.2	334.5	22.6009	50（2+）	3.0（3+）	8.55	3.13	132	85	First found	0	0	0	0	0
1377	M	69	2019-01-31 11:40:17	MCD	19.5	93	45.8065	20（1+）	10.0（4+）	3.78	2.03	147	98	2 years	0	0	0	0	1
1378	M	31	2019-01-31 11:17:03	TIN	35.2	1279.4	3.95	20（1+）	1.0（2+）	21.7	0.43	162	103	0	0	0	1	0	0
1379	M	16	2019-01-28 11:26:24	LN	27.9	191.2	38.9121	250（3+）	3.0（3+）	244.24	4.62	126	74	0	0	0	0	0	0
1380	F	78	2019-01-28 11:26:13	TIN	24.3	631.6	5.02	7.5（3+）	1.0（2+）	238.07	1.45	171	106	First found	0	0	0	Ⅴ	0
1381	F	40	2019-01-24 10:50:24	IgA	39.4	57.6	111.32	50（2+）	-	13.68	3.05	137	76	0	0	0	0	0	0
1382	F	19	2019-01-17 11:31:47	IgA	17.8	42.1	143.03	7.5（3+）	10.0（4+）	434.84	15.12	137	84	0	0	0	0	0	1
1383	M	68	2019-01-17 11:31:38	MN	20.7	83.5	82.49	0.6（1+）	3.0（3+）	7	6.64	114	71	0	0	0	0	0	1
1384	M	23	2019-01-17 11:31:26	IgA	41.5	78	120.94	10.0（3+）	0.5（1+）	23.65	0.37	125	78	0	0	0	0	0	0
1385	F	45	2019-01-14 11:45:19	MsPGN	41.6	104.3	55.84	0.6（1+）	0.2（+-）	1.39	0.33	140	74	0	0	0	0	0	0
1386	M	58	2019-01-14 11:45:08	MN	25.5	82.2	90.19	0.3（+-）	1.0（2+）	2.27	6.84	109	72	0	0	0	0	0	1
1387	M	54	2019-01-14 11:44:48	DN	24.7	84.9	89.2	10.0（1+）	5.0（3+）	29.04	3.05	152	87	0	First found	0	0	0	1
1388	M	28	2019-01-10 11:51:32	IgA	42.8	97	91.14	0.6（1+）	1.0（2+）	21.82	0.75	129	80	0	0	0	0	0	0
1389	M	49	2019-01-10 11:51:21	MPGN	39.2	60.2	112.07	0.6（1+）	-	6.77	0.05	130	80	10 years	0	0	0	0	0
1390	M	55	2019-01-10 11:50:03	MN	32.2	82.2	92.11	0.3（+-）	0.3（1+）	1.31	2.57	127	83	3 years	0	0	0	0	0
1391	F	34	2019-01-07 11:32:39	IgA	36.7	127.4	47.37	7.5（3+）	0.3（1+）	2.68	0.33	134	81	0	0	0	0	Ⅲ	0
1392	F	75	2019-01-03 11:58:51	HBVN	30.4	44.2	94.98	1.5（2+）	3.0（3+）	12.15	1.38	150	90	36 years	6 years	0	0	0	1
1393	M	73	2019-01-03 11:58:33	MN	22.7	95.3	67.88	0.6（1+）	1.0（2+）	1.98	3.05	177	72	10 years	0	0	0	0	1
1394	M	60	2019-01-03 11:58:22	Renal lesion associated with malignant tumor	19.4	53	109.32	0.3（+-）	10.0（4+）	0.79	9.49	109	83	25 years	0	1	0	0	1
1395	M	23	2018-12-27 16:16:18	MCD	34.2	93.6	98.56	7.5（3+）	0.3（1+）	91.57	0.65	111	85	First found	0	0	0	0	1
1396	F	63	2018-12-27 16:15:30	IgA	36.4	62.5	91.4	1.5（2+）	1.0（2+）	37.71	1.54	141	86	2 months	4 months	0	0	0	0
1397	F	53	2018-12-27 11:56:47	IgA	42.4	57.3	101.78	-	0.3（1+）	1.35	0.071	148	91	2 years	2 years	0	0	0	0
1398	M	43	2018-12-27 11:56:33	IgA	38.6	125.1	67.17	0.6(1+)	1.0(2+)	18.34	1.7	146	94	1 year	0	0	0	Ⅱ	0
1399	M	64	2018-12-27 11:55:43	MN	18.6	107.2	57.05	1.5(2+)	10.0(4+)	21.17	9.1	134	86	0	0	0	1	0	1
1400	M	54	2018-12-27 11:55:31	MN	35	104.2	69.63	2.0(2+)	0.1(+-)	21.06	1.61	107	75	0	2 months	0	0	0	1
1401	F	58	2018-12-24 11:51:15	DN	28.2	43.4	107.67	0.3(+-)	3.0(3+)	2.16	6.75	168	67	half a month	8 years	0	0	0	1
1402	F	54	2018-12-24 11:51:00	IgA	36.8	67.9	86.54	2.0(2+)	-	7.79	0.38	135	80	0	0	0	0	0	0
1403	F	39	2018-12-24 11:50:49	IgA	36.2	49	122.93	0.6(1+)	0.7(1+)	1.31	1.36	118	75	0	0	0	0	0	0
1404	F	54	2018-12-24 10:37:25	IgA	34.5	143.2	60.69	7.5(3+)	1.0(2+)	835.27	1.79	146	84	10 years	0	0	0	0	0
1405	F	60	2018-12-20 11:34:51	DN	29.8	123	59.26	0.6(1+)	3.0(3+)	4.46	3.05	173	88	2 years	13 years	0	0	0	1
1406	F	29	2018-12-20 11:33:51	IgA	34.2	62.2	116.73	0.3(+-)	3.0(3+)	1.37	0.86	148	79	6 years	0	0	0	0	0
1407	F	61	2018-12-20 11:33:36	FSGS	37	112.3	45.64	2.0(2+)	1.0(2+)	10.42	2.49	183	98	5 years	0	0	0	Ⅲ	0
1408	F	56	2018-12-17 11:27:48	MN	29.1	76	75.79	1.5(2+)	1.0(2+)	2.32	1.86	128	82	0	0	1	0	0	1
1409	F	72	2018-12-17 11:27:27	IgA	31.9	102.7	47.07	1.5(2+)	3.0(3+)	1.37	0.89	121	67	4 years	0	0	0	0	1
1410	F	22	2018-12-13 11:25:03	IgA	37.3	67.1	111.87	10.0(3+)	1.0(2+)	124.9	2.09	132	79	0	0	0	0	0	0
1411	F	73	2018-12-13 11:24:48	DN	22.4	77.3	65.89	1.5(2+)	10.0(4+)	20.03	7.78	137	84	0	20 years	0	0	0	1
1412	M	30	2018-12-10 11:31:48	HBVN	40	74.5	117.33	1.0(1+)	0.7(1+)	0.74	0.57	128	82	0	0	0	0	0	0
1413	F	44	2018-12-10 11:31:15	IgA	38.4	65.3	79.26	1.5(2+)	0.3(1+)	57.08	0.12	124	76	0	0	0	0	0	0
1414	M	55	2018-12-03 11:33:26	MN	16.2	70	100.99	1.5(2+)	10.0(4+)	26.68	6.7	144	96	1 month	0	0	0	0	1
1415	M	31	2018-12-03 11:33:07	IgA	35.8	170.3	45.19	2.0(2+)	2.0(2+)	39.76	4.4	141	81	1 month	0	0	0	0	0
1416	M	33	2018-11-29 11:09:58	MN	22.7	70.3	117.66	0.6(1+)	3.0(3+)	10.91	3.96	120	70	0	0	0	0	0	1
1417	M	47	2018-11-29 11:07:29	IgA	40.9	127.8	57.14	1.5(2+)	0.3(1+)	22.91	0.24	118	74	0	0	0	0	Ⅱ	0
1418	M	15	2018-11-26 12:04:27	IgA	30.5	74.4	100.806	7.5(3+)	3.0(3+)	345.96	3.24	115	80	0	0	0	0	0	0
1419	M	43	2018-11-26 12:04:16	DN	60.7	33.4	148.92	-	0.3(1+)	1.69	0.5	120	75	0	10 years	0	0	0	0
1420	M	76	2018-11-26 12:04:03	DN	44.5	144.8	40.08	-	-	0.47	0.22	122	74	5 years	5 years	0	0	Ⅲ	0
1421	F	17	2018-11-26 12:03:44	MCD	15.3	52.7	140.038	1.0(1+)	3.0(3+)	2.99	7.61	138	85	0	0	0	0	0	1
1422	F	58	2018-11-26 12:03:34	Hypertensive Renal Disease	42.5	90.6	60.43	5.0(2+)	1.0(2+)	12.98	1.7	167	92	10 years	0	0	0	Ⅲ	0
1423	M	55	2018-11-22 11:51:07	MN	22.8	85.6	87.7	-	3.0(3+)	0.41	2.96	71	49	0	0	0	0	0	1
1424	M	49	2018-11-22 11:50:53	MN	35.4	76.8	101.4	2.0(2+)	1.0(2+)	49.1	1.61	138	85	1 year	0	0	0	0	0
1425	M	70	2018-11-22 11:50:37	IgA	34.7	146.7	41.15	0.3(+-)	0.7(1+)	0.34	0.79	114	71	20 years	0	0	0	0	1
1426	F	28	2018-11-22 11:50:24	IgA	42.2	52.8	124.63	0.6(1+)	-	0.49	3.05	124	76	0	0	0	0	0	0
1427	F	29	2018-11-22 11:50:10	MCD	18.7	53.4	123.3	0.3(+-)	2.0(2+)	0.56	5.83	115	90	0	0	0	0	0	1
1428	M	39	2018-11-22 11:49:51	IgA	44.4	98.2	83.12	7.5(3+)	0.15(+-)	26.05	0.99	145	90	1 month	0	0	0	0	0
1429	F	26	2018-11-19 11:20:02	IgA	41.5	47.4	130.96	5.0(2+)	0.2(+-)	3.11	0.24	123	74	0	0	0	0	0	0
1430	F	45	2018-11-19 11:19:45	ANCA-associated glomerulonephritis	27.4	494.5	27.5	10.0(3+)	2.0(2+)	73.75	1.12	168	101	1 month	0	0	0	Ⅴ	0
1431	F	43	2018-11-15 11:28:33	MCD	26.9	44.4	118.74	0.3(+-)	2.0(2+)	1.21	7.87	110	90	0	0	0	0	0	1
1432	M	58	2018-11-15 11:28:21	IgA	33.5	89.8	88.63	0.6(1+)	1.0(2+)	2.34	1.06	121	62	0	0	0	0	0	0
1433	M	63	2018-11-15 11:06:19	MN	21.6	79.5	90.61	5.0(2+)	3.0(3+)	12.55	5.96	133	80	0	0	0	0	0	1
1434	M	26	2018-11-15 11:04:36	MN	20.7	76.7	119.24	5.0(2+)	3.0(3+)	2.86	2.85	123	82	0	0	0	0	0	1
1435	F	28	2018-11-15 10:51:33	IgA	33.5	48.5	120.56	10.0(3+)	6.0(4+)	284.67	3.91	148	78	0	0	0	0	0	0
1436	M	31	2018-11-12 11:09:02	MN	27.8	90	97.7	0.3(+-)	0.5(1+)	3.6	1.74	129	78	0	0	0	0	0	0
1437	F	56	2018-11-12 11:08:47	IgA	32	82.6	61.8	2.0(2+)	1.0(2+)	6.21	1.94	165	87	First found	0	0	0	Ⅱ	0
1438	F	29	2018-11-08 10:10:18	FSGS	40	179.4	32.43	-	-	0.2	0.21	100	79	0	0	0	0	Ⅲ	0
1439	M	54	2018-11-05 11:37:28	MN	18.2	155.7	42.85	5.0（2+）	3.0（3+）	13.73	12.52	122	76	0	0	0	0	Ⅲ	1
1440	F	15	2018-11-05 11:13:00	LN	20.7	56.9	77.55	10.0（3+）	2.0（2+）	115.04	10.05	116	70	0	0	0	0	0	0
1441	F	66	2018-11-05 11:12:45	MCD	40.7	89.9	57.66	-	0.5（1+）	0.52	1.05	101	60	0	0	0	0	Ⅱ	0
1442	F	27	2018-11-05 10:40:23	MN	21.7	48.5	129.06	-	1.0（2+）	5.4	6.63	134	100	0	0	0	0	0	1
1443	F	75	2018-11-01 12:16:47	MN	24.7	50.9	90.67	0.6（1+）	2.0（2+）	8.37	7.21	155	86	0	0	0	0	0	1
1444	F	27	2018-10-29 11:33:17	LN	23.8	327.9	15.87	5.0（2+）	2.0（2+）	40.81	6.19	145	83	0	0	0	0	Ⅴ	1
1445	F	41	2018-10-25 11:32:24	MN	41.3	61	108.47	5.0（2+）	2.0（2+）	10.35	1.12	112	78	0	0	0	0	0	0
1446	M	73	2018-10-25 11:32:15	MN	18.6	89.4	73.33	5.0（2+）	6.0（3+）	14.62	3.88	136	74	First found	6 months	0	0	0	1
1447	M	30	2018-10-22 10:58:51	IgA	41.1	107.7	79.19	2.0（2+）	1.0（2+）	8.32	3.05	164	111	First found	0	0	0	0	0
1448	M	71	2018-10-18 11:09:17	MN	13.5	69.3	90.63	5.0(2+)	6.0(3+)	24.95	8.61	142	80	0	0	0	0	0	1
1449	F	28	2018-10-15 11:40:42	TIN	39.2	113.9	61.31	-	-	0.02	0.05	92	62	0	0	0	0	Ⅲ	0
1450	F	54	2018-10-15 11:40:26	DN	30.7	59.6	99.77	2.0(2+)	2.0(2+)	6.08	3.13	140	90	First found	16 years	0	0	Ⅰ	0
1451	M	22	2018-10-08 10:45:35	MN	18.8	56.2	100.61	2.0(2+)	3.0(3+)	25.18	2.98	144	87	0	0	0	0	0	1
1452	F	17	2018-09-29 11:50:09	Gitelman syndrome	47.9	42	175.714	-	-	0.18	3.05	121	60	0	0	0	0	0	0
1453	M	29	2018-09-29 11:43:30	DN	27.1	897.8	20.52	2.0(2+)	2.0(2+)	40.36	2.47	178	106	0	12 years	0	0	Ⅴ	0
1454	F	61	2018-09-27 11:43:30	LN	19.6	64.8	72.62	0.6(1+)	2.0(2+)	0.95	2.41	135	75	0	0	0	0	0	1
1455	F	51	2018-09-27 11:43:21	MN	20.6	54.1	138.98	2.0(2+)	2.0(2+)	1.76	1.3	127	76	0	0	0	0	0	1
1456	F	76	2018-09-27 11:31:32	MN	27.4	53.7	95.92	10.0(3+)	3.0(3+)	9.99	4.86	151	89	10 years	0	0	0	0	1
1457	M	55	2018-09-27 10:33:38	MN	16	162.6	61.31	5.0(2+)	6.0(3+)	25.81	6.89	145	78	0	0	0	0	Ⅲ	1
1458	F	31	2018-09-20 11:43:53	LN	32.3	180.2	37.8	10.0(3+)	1.0(2+)	13.18	5.91	121	81	0	0	0	1	0	1
1459	F	42	2018-09-17 11:10:00	IgA	48.5	94.9	84.92	-	-	0.38	0.29	128	80	4 years	0	0	0	Ⅲ	0
1460	M	19	2018-09-17 11:09:50	IgM	14.1	41	128.58	5.0(2+)	6.0(3+)	0.61	5.71	125	72	0	0	0	0	0	1
1461	M	39	2018-09-13 10:42:55	MN	37.4	83.9	103.13	-	1.0(2+)	1.55	3.05	132	78	1 year	0	0	0	Ⅱ	0
1462	M	49	2018-09-10 11:03:49	IgA	38.8	125.2	87.67	5.0(2+)	0.3(1+)	1.28	0.52	133	77	0	0	0	0	Ⅲ	0
1463	F	52	2018-09-10 11:03:30	MN	36	58.4	156.72	10.0(3+)	3.0(3+)	21	1.1	120	71	8 years	0	0	0	0	0
1464	F	46	2018-09-06 11:19:35	MsPGN	39	125.5	71.31	-	0.1(+-)	0.79	0.44	127	80	3 years	0	0	0	Ⅲ	0
1465	F	70	2018-09-06 11:17:41	MN	29.1	57	78.31	10.0(3+)	3.0(3+)	79.79	3.03	141	83	10 days	0	0	1	0	1
1466	M	48	2018-09-03 11:21:00	DN	26.2	132.9	33.8	5.0(2+)	3.0(3+)	2.38	7.86	157	103	1 year	10 years	0	0	Ⅲ	0
1467	F	26	2018-08-30 11:35:45	IgA	32.8	80.7	84.03	2.0(2+)	3.0(3+)	56.29	1.05	158	83	0	0	0	0	0	0
1468	M	30	2018-08-30 11:35:23	IgA	39.5	92.66	93.6	2.0(2+)	-	11.5	0.77	118	79	0	0	0	0	0	0
1469	F	55	2018-08-27 11:24:14	LN	23.4	80.1	47.65	10.0(3+)	3.0(3+)	6.5	3.91	158	96	2 months	0	0	1	0	1
1470	F	38	2018-08-27 11:24:00	LN	15.8	98.1	56.83	10.0(3+)	3.0(3+)	35.08	7.79	162	112	0	0	0	0	0	1
1471	F	38	2018-08-27 11:23:44	LN	20.4	85	62.29	10.0(3+)	3.0(3+)	49.91	3.05	109	79	0	0	0	0	0	1
1472	M	26	2018-08-23 11:35:48	MCD	17.7	83	88.63	0.6(1+)	6.0(3+)	3.44	4.92	133	85	0	0	0	0	0	1
1473	F	25	2018-08-23 11:35:30	IgA	37.9	57	112.3	10.0(3+)	6.0(3+)	2.56	2.46	136	88	0	0	0	0	0	0
1474	F	55	2018-08-20 11:47:52	MN	20.8	58	114.49	2.0(2+)	2.0(2+)	4.91	0.75	138	74	2 years	0	0	0	0	1
1475	F	22	2018-08-20 11:47:39	Alport syndrome	43.4	48	121.11	2.0(2+)	0.1(+-)	0.77	0.36	132	88	0	0	0	0	0	0
1476	M	61	2018-08-20 11:47:26	HBVN	39.5	75	121.11	10.0(3+)	0.5(1+)	104.08	2.26	137	83	7 years	0	0	0	0	0
1477	M	34	2018-08-20 11:47:09	DN	29.5	268	43.53	0.6(1+)	6.0(3+)	8.48	18.48	159	97	12 days	4 months	0	0	Ⅳ	0
1478	M	38	2018-08-20 11:46:51	MCD	22	218	30.54	0.6(1+)	6.0(3+)	3.15	27.51	134	76	0	0	0	0	0	1
1479	F	23	2018-08-16 11:12:51	IgA	40.1	51	121.11	10.0(3+)	0.2(+-)	18.68	3.05	120	74	0	0	0	0	0	0
1480	F	63	2018-08-13 11:14:07	Hypertensive Renal Disease	38.6	235	39.61	-	-	0.74	0.25	135	78	19 years	2 years	0	0	Ⅴ	0
1481	F	68	2018-08-09 11:54:13	MN	20.8	45	121.11	2.0(2+)	6.0(3+)	2.91	9.17	149	82	First found	0	1	0	0	1
1482	M	33	2018-08-09 11:54:00	MCD	46.4	46	139.565	1.0(1+)	3.0(3+)	27.47	0.24	146	94	3 years	0	0	0	0	0
1483	M	30	2018-08-09 11:53:45	MN	22	86	83.17	1.0（1+）	2.0（2+）	22.05	5.1	166	98	First found	0	0	0	0	1
1484	M	20	2018-08-09 11:53:31	IgA	46.3	67	186.91	2.0（2+）	0.3（1+）	41.96	0.72	130	77	First found	0	0	0	Ⅰ	0
1485	M	42	2018-08-06 11:41:22	MN	23	65	112.94	5.0（2+）	2.0（2+）	5.42	3.88	118	80	0	0	0	0	0	1
1486	F	64	2018-08-02 11:09:03	DN	35.2	119	57.25	-	2.0（2+）	1.53	3.87	121	75	10 years	10 years	0	0	0	0
1487	M	46	2018-08-02 11:08:36	MCD	28.9	86	78.31	-	2.0（2+）	0.53	2.45	165	88	0	0	0	0	0	0
1488	F	51	2018-07-26 11:33:29	LN	29.2	58	68.83	2.0（2+）	2.0（2+）	5.94	0.5	123	74	2 years	0	0	0	Ⅱ	1
1489	M	20	2018-07-26 11:33:16	Obesity-related glomerulopathy	41.1	122	79.87	1.0（1+）	3.0（3+）	6.35	6.62	153	89	0	0	0	0	0	0
1490	M	27	2018-07-26 11:33:06	IgA	19.6	80	84.9	5.0（2+）	6.0（3+）	19.37	8.06	120	82	0	0	0	0	0	1
1491	F	32	2018-07-23 11:49:44	HSPN	37.1	51	126.56	2.0（2+）	0.5（1+）	5.74	0.72	105	70	0	0	0	0	0	0
1492	F	55	2018-07-23 11:49:35	MN	26.7	54	107.13	0.6（1+）	0.2（+-）	0	2.01	171	80	First found	0	1	0	0	0
1493	F	15	2018-07-19 12:17:54	MN	27.3	36	130.46	5.0（2+）	6.0（3+）	19.62	7.32	110	78	0	0	0	0	0	1
1494	M	46	2018-07-19 12:17:38	MN	20.2	73	109.96	1.0（1+）	2.0（2+）	20.5	7	112	83	0	0	0	0	0	1
1495	F	50	2018-07-19 12:17:24	LN	22.9	161	47.35	5.0（2+）	2.0（2+）	8.51	2.82	168	96	First found	0	0	0	Ⅲ	1
1496	M	47	2018-07-19 12:17:11	MN	21.2	155	36	5.0（2+）	3.0（3+）	3.78	3.24	143	84	0	0	0	1	0	1
1497	F	41	2018-07-19 12:16:57	MN	26.4	49	138.98	1.0(1+)	3.0(3+)	5.76	5.42	118	82	0	0	0	0	0	1
1498	F	50	2018-07-19 12:16:39	MN	26.4	37	151.23	0.3(+-)	6.0(3+)	7.27	12.12	144	65	0	0	0	0	0	1
1499	F	28	2018-07-16 11:44:21	FSGS	40.8	162	54.43	0.3（+-）（mg/L）	0.2（+-）	0.4	0.35	93	64	0	0	0	0	Ⅲ	0
1500	M	19	2018-07-16 11:44:02	MCD	15	70	79.87	10（+-）	1.0（2+）	2.05	8.91	130	80	0	0	0	1	0	1
1501	F	58	2018-07-12 11:23:56	MN	34.6	41	105.76	1.0（1+）（mg/L）	6.0（3+）	11.12	2.63	112	82	0	0	0	0	0	0
1502	M	56	2018-07-12 10:53:46	IgA	42.4	75	126.56	1.0（1+）（mg/L）	0.1（+-）	3.22	0.19	150	88	2 months	0	0	0	0	0
1503	F	55	2018-07-09 11:47:20	MN	24.3	42	121.11	1.0（1+）（mg/L）	1.0（2+）	3.26	2.4	140	86	0	0	0	0	0	0
1504	M	58	2018-07-05 11:41:41	TIN	39.8	303	56.01	-	-	0.99	0.16	106	64	0	0	0	1	0	0
1505	M	31	2018-07-05 11:41:20	IgA	38.7	191	57.25	10（3+）（mg/L)	1.0（2+）	48.73	1.75	139	94	0	0	0	1	0	0
1506	M	34	2018-07-05 11:41:06	MN	36.2	74	138.98	1.0（1+）（mg/L）	6.0（3+）	5.22	2.11	124	83	0	0	0	0	0	0
1507	F	53	2018-07-02 11:25:36	MN	29.5	52	101.86	0.3（+-）（mg/L）	0.2（+-）	2.09	0.77	92	57	0	0	0	0	0	0
1508	F	52	2018-06-28 11:56:31	DN	38.7	181	56.83	0.3（+-）（mg/L）	0.7（1+）	1.4	4.82	136	78	3 years	12 years	0	0	Ⅲ	0
1509	M	30	2018-06-28 11:56:18	IgA	42.2	112	55.6	0.3（+-）（mg/L）	0.5（1+）	0.4	0.03	125	78	2 years	0	0	0	Ⅲ	0
1510	F	28	2018-06-28 11:55:30	IgA	39.4	61	124.69	2.0（2+）（mg/L）	0.7（1+）	14.44	1.66	120	78	half a year	0	0	0	0	0
1511	M	59	2018-06-28 11:55:15	DN	19.7	465	19.48	2.0（2+）（mg/L）	2.0（2+）	13.28	0.57	152	80	9 years	9 years	0	1	0	0
1512	F	60	2018-06-25 11:55:12	DN	32	121	48.56	0.3（+-）（mg/L）	2.0（2+）	2.74	1.39	150	72	3 years	5 years	0	0	Ⅲ	0
1513	M	44	2018-06-25 11:54:54	ANCA-associated glomerulonephritis	28.6	436	13.29	2.0（2+）（mg/L）	1.0（2+）	11.5	1.55	138	82	0	0	0	1	0	0
1514	F	18	2018-06-14 11:31:53	IgA	32.8	66	107.13	10（3+）（mg/L)	1.0（2+）	100.19	3.05	130	80	0	0	0	0	0	0
1515	F	70	2018-06-14 11:31:44	MN	30.8	46	97.05	5.0（2+）（mg/L）	0.7（1+）	23.11	3.9	125	82	3 months	0	0	0	0	1
1516	M	18	2018-06-07 11:06:36	MCD	16.1	70	85.82	1.0（1+）（mg/L）	6.0（4+）	4.07	3.01	129	85	0	0	0	0	0	1
1517	F	50	2018-06-07 11:06:20	IgA	37.9	96	68.83	2.0（2+）（mg/L）	0.2（+-）	5.53	0.29	166	105	9 years	0	0	0	Ⅲ	0
1518	M	24	2018-06-04 11:54:10	MN	28.2	83	126.56	1.0（1+）（mg/L）	0.5（1+）	1.89	1.7	138	85	0	0	0	0	0	1
1519	F	44	2018-06-04 11:53:56	MCD	44.3	88.8	54.94	-	0.3（1+）	1.08	0.91	128	84	0	0	0	0	Ⅱ	0
1520	F	28	2018-06-04 11:53:43	TIN	40.4	335	38.38	-	0.2（+-）	1.69	3.05	109	68	0	0	0	1	0	0
1521	M	45	2018-05-31 11:29:04	MN	22.3	82	103.13	1.0（1+）（mg/L）	2.0（2+）	5.4	11.78	129	80	0	0	0	0	0	1
1522	M	25	2018-05-31 11:28:49	FSGS	31.7	1889	12.8	2.0（2+）（mg/L）	6.0（3+）	27.23	4.26	144	85	20 days	0	0	0	Ⅴ	0
1523	M	49	2018-05-28 12:10:19	DN	23.2	142	48.87	1.0（1+）（mg/L）	3.0（3+）	11.21	11.42	162	108	half a year	8 years	0	0	Ⅲ	1
1524	M	54	2018-05-28 12:10:04	MN	27.9	74	121.11	5.0（2+）（mg/L）	2.0（2+）	15.43	2.15	108	68	0	0	0	0	0	0
1525	M	18	2018-05-28 12:09:51	IgA	39.6	99	107.13	5.0（2+）（mg/L）	2.0（2+）	57.42	2.21	133	87	1 month	0	0	0	Ⅱ	0
1526	M	29	2018-05-24 11:56:54	IgA	47.4	85	132.5	1.0（1+）（mg/L）	0.5（1+）	7.43	1.89	116	85	0	0	0	0	0	0
1527	F	50	2018-05-24 11:48:49	MN	23.8	69	103.13	1.0（1+）（mg/L）	0.7（1+）	3.33	2.9	122	78	0	0	0	0	0	1
1528	F	47	2018-05-21 11:38:55	MN	18.9	69	87.67	0.3（+-）（mg/L）	3.0（3+）	8.86	4.34	124	93	First found	0	0	0	0	1
1529	M	57	2018-05-17 11:31:31	MN	20.6	70	86.74	1.0（1+）（mg/L）	2.0（2+）	9.63	3.05	111	77	0	0	0	0	0	1
1530	M	37	2018-05-14 11:06:54	MPGN	26.5	106	56.42	10（3+）（mg/L)	2.0（2+）	2435.08	7.79	150	95	First found	0	0	0	Ⅲ	1
1531	M	64	2018-05-10 11:02:41	DN	39.5	80	84.03	0.3（+-）（mg/L）	1.0（2+）	4.14	2.44	123	74	6 months	20 years	0	0	Ⅱ	0
1532	M	64	2018-05-10 11:02:32	MCD	15.5	75	101.86	1.0（1+）（mg/L）	3.0（3+）	1.91	6.16	104	69	0	0	0	0	0	1
1533	M	42	2018-05-10 11:02:20	Alport syndrome	44.3	227	58.11	-	0.3（1+）	0.65	0.54	130	76	1 month	0	0	0	Ⅳ	0
1534	M	54	2018-05-07 11:49:27	MN	26.4	71	126.56	2.0（2+）（mg/L）	1.0（2+）	30.13	4.11	116	59	0	0	0	0	0	1
1535	F	51	2018-05-07 11:48:38	MN	25.2	86	88.03	0.6（1+）（mg/L）	1.0（2+）	5.22	3.75	136	76	0	0	0	0	0	1
1536	M	46	2018-05-03 11:58:27	DN	28.6	141	56.83	0.6（1+）（mg/L）	1.0（2+）	4.86	3.05	139	68	1 month	2 weeks	0	0	Ⅲ	0
1537	M	56	2018-05-03 11:57:58	IgA	32.4	141	70.05	2.0（2+）（mg/L）	2.0（2+）	24.59	3.96	139	76	First found	0	0	0	Ⅱ	0
1538	F	57	2018-04-26 11:52:23	IgA	39.7	55	128.48	1.0（1+）（mg/L）	0.1（+-）	26.89	0.45	126	76	1 year	0	0	0	0	0
1539	F	30	2018-04-26 11:52:14	IgA	34	49	132.5	5.0（2+）（mg/L）	0.1（+-）	14.63	0.66	108	62	0	0	0	0	0	0
1540	M	62	2018-04-19 11:19:28	MN	17.6	131	68.24	2.0（2+）（mg/L）	2.0（2+）	4.5	5.2	153	98	0	0	0	0	Ⅱ	1
1541	F	61	2018-04-19 10:56:52	FSGS	28.9	101	58.11	5.0（2+）（mg/L）	3.0（3+）	5.87	10.28	150	79	0	0	0	0	Ⅲ	1
1542	M	64	2018-04-19 10:56:35	HBVN	29.2	86	79.08	2.0（2+）（mg/L）	1.0（2+）	33.25	2.53	156	82	0	First found	0	0	0	1
1543	M	42	2018-04-16 11:27:05	MN	19	80	88.63	2.0（2+）（mg/L）	2.0（2+）	24.03	3.4	125	75	0	0	0	0	0	1
1544	M	60	2018-04-16 11:18:54	MN	22.2	91	85.82	2.0（2+）（mg/L）	3.0（3+）	4.72	7.94	117	68	0	0	0	0	0	0
1545	M	52	2018-04-16 11:18:35	IgA	37.8	97	89.61	-	1.0（2+）	2.16	0.94	134	86	0	0	0	0	0	0
1546	M	28	2018-04-12 11:42:19	MN	33.5	60	132.5	0.3（+-）（mg/L）	6.0（3+）	31.41	5.22	137	83	0	0	0	0	0	1
1547	F	67	2018-04-12 11:42:08	IgA	34.8	133	54.05	10（3+）（mg/L)	0.7（1+）	42.91	1.42	120	71	0	0	0	0	Ⅲ	0
1548	M	60	2018-04-09 10:46:15	IgG4	36.9	158	56.42	-	-	0.67	0.71	149	91	0	0	0	0	Ⅲ	0
1549	M	22	2018-03-22 11:32:58	IgA	15.6	109	116.08	2.0（2+）（mg/L）	6.0（4+）	5.04	3.05	125	72	0	0	0	1	0	1
1550	M	30	2018-03-19 11:35:28	IgA	31.4	54	165.7	-	2.0（2+）	2.34	3.05	135	74	0	0	0	0	0	1
1551	F	35	2018-03-19 11:35:19	IgA	27.2	75	99.4	5.0（2+）（mg/L）	1.0（2+）	15.12	3.05	105	73	0	0	0	0	0	0
1552	F	57	2018-03-14 11:32:04	MCD	23.3	503	19.48	10（3+）（mg/L）	6.0（3+）	50.8	0.65	128	77	First found	0	0	1	0	1
1553	F	42	2018-03-12 11:30:34	MN	32.4	49	136.76	5.0（2+）（mg/L）	1.0（2+）	7.65	4.98	121	79	1 month	0	0	0	0	0
1554	F	20	2018-03-08 12:30:23	LN	23.3	107	75.36	5.0（2+）（mg/L）	3.0（3+）	249.95	3.72	124	87	0	0	0	0	Ⅱ	1
1555	M	55	2018-03-08 12:30:00	MN	20	74	111.44	1.0（1+）（mg/L）	1.0（2+）	4.37	1.96	133	88	0	0	0	0	0	1
1556	M	45	2018-03-05 11:17:41	IgA	36.5	83	95.92	2.0（2+）（mg/L）	2.0（2+）	5	0.3	162	102	3 years	0	0	0	0	0
1557	M	62	2018-03-05 11:17:33	MN	17.5	168	33.8	1.0（1+）（mg/L）	1.0（2+）	19.53	4.16	152	96	half a year	0	0	0	Ⅳ	1
1558	M	52	2018-03-01 11:25:44	MN	30.2	51	143.65	0.3（+-）（mg/L）	2.0（2+）	1.12	3.46	130	85	0	4 years	0	0	0	0
1559	M	30	2018-03-01 11:25:33	MN	28.8	46	141.28	-	1.0（2+）	1.01	3.98	105	70	0	0	0	0	0	1
1560	M	64	2018-03-01 11:25:22	MN	17.1	97	99.4	1.0（1+）（mg/L）	6.0（3+）	26.96	7.89	143	96	0	0	0	0	0	1
1561	M	49	2018-02-26 13:06:21	MCD	19.7	90	81.49	0.6（1+）（mg/L）	3.0（3+）	3.96	3.05	139	91	0	0	0	1	0	1
1562	M	60	2018-02-26 13:06:04	MN	28.6	72	76.08	0.3（+-）（mg/L）	0.3（1+）	2.7	1.6	140	92	20 days	0	0	0	0	1
1563	F	60	2018-02-26 13:05:28	HSPN	35.8	53	92.66	2.0（2+）（mg/L）	0.5（1+）	20.68	3.05	142	92	10 years	0	0	0	0	0
1564	M	27	2018-02-26 13:05:01	HBVN	20.8	82	117.71	1.0（1+）（mg/L）	3.0（3+）	12.78	13.11	120	70	0	0	0	0	0	1
1565	M	16	2018-02-08 11:38:57	HSPN	38.9	51	126.56	1.0（1+）（mg/L）	0.5（1+）	21.17	3.05	122	78	0	0	0	0	0	0
1566	M	30	2018-02-08 11:38:43	IgA	37.5	209	56.42	5.0（2+）（mg/L）	0.7（1+）	76.36	3.31	109	78	2 months	0	0	0	Ⅲ	0
1567	F	58	2018-02-08 11:38:24	MN	23	101	70.05	1.0（1+）（mg/L）	2.0（2+）	57.98	3.55	149	78	1 year	0	0	0	Ⅱ	1
1568	M	40	2018-02-05 12:22:15	IgA	45.6	78	90.6	5.0（2+）（mg/L）	-	4.07	0.17	122	79	0	0	0	0	0	0
1569	F	36	2018-02-05 12:22:03	LN	22.4	156.8	39.7959	0.15（2+）（mg/dL）	-	5.65	3.05	174	97	0	0	0	1	0	1
1570	F	34	2018-02-05 12:21:50	IgA	43.4	46	126.56	5.0（2+）（mg/L）	0.5（1+）	24.52	1.13	110	75	0	0	0	0	Ⅰ	0
1571	M	33	2018-02-05 12:21:32	MN	32.2	54	112.94	-	0.3（1+）	2.34	1.63	103	75	0	0	0	0	0	1
1572	M	71	2018-02-01 11:48:25	MN	31.5	62	143.65	5.0（2+）（mg/L）	3.0（3+）	52.7	3.55	127	83	0	0	0	0	0	1
1573	F	39	2018-01-29 11:31:23	LN	19.2	463.4	10.8	5.0（2+）（mg/L）	3.0（3+）	34	3.77	180	99	20 years	0	0	1	0	1
1574	F	66	2018-01-29 11:31:08	MN	21.9	75	67.08	0.6（1+）（mg/L）	6.0（3+）	4.46	3.05	157	101	4 months	0	0	0	0	1
1575	M	39	2018-01-29 11:30:55	IgA	44.6	90	101.86	-	0.2（+-）	2.34	0.1	118	83	0	0	0	0	0	0
1576	M	19	2018-01-22 10:54:31	FSGS	32.9	1011	25.81	2.0（2+）（mg/L）	3.0（3+）	47.86	4.67	135	106	First found	0	0	0	Ⅴ	0
1577	M	55	2018-01-22 10:54:13	HBVN	17.1	75	79.08	2.0（2+）（mg/L）	2.0（2+）	45.56	3.1	117	77	0	0	0	0	0	1
1578	F	32	2018-01-15 12:00:18	LN	42.5	58	115.04	0.6（1+）（mg/L）	0.7（1+）	1.31	3.24	117	76	0	0	0	0	0	0
1579	M	27	2018-01-15 11:50:51	DN	33.7	105	73.28	Ca50（2+）	1.0（2+）	5	7.04	122	77	0	9 years	0	0	Ⅱ	1
1580	F	31	2018-01-15 11:18:08	IgA	41.5	120	59.44	-	0.7（1+）	2.36	1.1	127	95	1 year	0	0	0	Ⅱ	0
1581	M	27	2018-01-15 10:31:12	IgA	38	281	49.83	5.0（2+）（mg/L）	1.0（2+）	97.33	2.32	131	86	0	0	0	0	Ⅳ	0
1582	M	42	2018-01-11 11:16:31	DN	33.8	180	49.51	Ca50（2+）	5.0（3+）	5	2.04	148	76	2 years	11 year	0	0	Ⅲ	0
1583	F	55	2018-01-11 11:16:13	IgA	31.8	157	70.05	2.0（2+）（mg/L）	1.0（2+）	15.14	2.88	154	87	10 years	0	0	0	Ⅱ	0
1584	F	47	2018-01-11 11:15:59	MCD	20.9	60	153.93	-	2.0（2+）	1.17	3.1	116	80	0	0	0	0	0	1
1585	F	47	2018-01-04 11:36:07	MCD	18.8	46	91.62	2.0（2+）（mg/L）	3.0（3+）	18.83	3.55	89	60	0	0	0	0	0	1
1586	M	65	2018-01-04 11:35:51	MN	18.3	130	66.51	2.0（2+）（mg/L）	6.0（3+）	13.16	9.53	137	79	5 years	0	0	0	Ⅱ	1
1587	F	27	2018-01-04 11:35:33	Alport syndrome	27.5	65	109.96	1.0（1+）（mg/L）	1.0（2+）	16.02	1.68	125	70	0	0	0	0	0	0
1588	F	53	2017-12-28 11:28:43	IgA	35	106	68.83	0.6（1+）（mg/L）	1.0（2+）	5.2	0.26	120	73	3 years	0	0	0	Ⅲ	0
1589	M	50	2017-12-28 11:28:35	MCD	27.7	59	112.94	-	2.0（2+）	2.34	0.18	146	101	0	0	0	0	0	1
1590	M	53	2017-12-25 11:34:19	MN	40	103	74.66	-	1.0（2+）	2.34	3.35	145	65	5 years	First found	0	0	Ⅱ	0
1591	M	44	2017-12-25 11:34:09	IgA	44.3	156	70.05	1.0（1+）（mg/L）	0.5（1+）	23.49	1.42	134	96	5 years	0	0	0	Ⅱ	0
1592	F	27	2017-12-25 11:33:58	MN	30.4	44	107.13	-	1.0（2+）	5.4	1.18	120	70	0	0	0	0	0	1
1593	M	62	2017-12-21 11:58:06	ANCA-associated glomerulonephritis	33.1	273	23.11	5.0（2+）（mg/L）	0.2（+-）	36.7	0.53	153	93	First found	0	0	0	Ⅳ	0
1594	M	63	2017-12-21 11:25:00	MN	18.2	72	126.56	0.6（1+）（mg/L）	2.0（2+）	4.55	3.05	160	100	1 month	0	0	0	0	1
1595	M	48	2017-12-18 11:31:20	IgA	37	98	83.17	-	0.5（1+）	0.18	0.38	104	74	7 years	0	0	0	Ⅱ	0
1596	F	41	2017-12-14 11:35:25	IgA	38.1	74	95.92	2.0（2+）（mg/L）	0.2（+-）	34.47	0.47	120	80	0	0	0	0	0	0
1597	M	30	2017-12-14 11:35:08	IgA	38.6	114	107.13	2.0（2+）（mg/L）	0.5（1+）	18.47	0.9	122	69	0	0	0	0	0	0
1598	M	46	2017-12-07 11:03:48	ANCA-associated glomerulonephritis	38	109	78.31	10（3+）（mg/L）	0.7（1+）	551.36	0.56	125	78	0	0	0	0	Ⅱ	0
1599	M	23	2017-12-07 11:03:34	IgA	38.9	111	70.05	-	0.1（+-）	0.11	0.81	127	64	First found	0	0	0	Ⅱ	0
1600	M	29	2017-12-04 11:38:03	IgA	40.6	160	54.43	0.6（1+）（mg/L）	0.5（1+）	6.19	1.78	154	102	1 month	0	0	0	Ⅲ	0
1601	F	28	2017-11-30 11:57:28	MCD	20.1	61.3	128.48	2.0（2+）（mg/L）	6.0（3+）	52.34	6.43	110	65	0	0	0	0	0	1
1602	F	60	2017-11-30 11:57:17	IgA	30.8	101	62.79	10（3+）（mg/L）	0.7（1+）	118.87	1.27	140	86	7 years	0	0	1	0	0
1603	F	37	2017-11-30 11:57:08	IgM	34.6	212	29.1509	5.0（2+）（mg/L）	0.7（1+）	109.42	1.53	128	71	2 months	0	0	0	Ⅲ	0
1604	M	72	2017-11-27 11:19:42	MN	18.5	70	78.31	2.0（2+）（mg/L）	6.0（3+）	2.75	10.25	167	91	First found	0	0	0	0	1
1605	M	57	2017-11-27 11:19:33	DN	34.1	118	73.28	0.6（1+）（mg/L）	0.7（1+）	2.02	3.66	137	85	First found	7 years	0	0	Ⅱ	0
1606	M	42	2017-11-20 10:57:37	IgA	45.8	164	70.05	0.6（1+）（mg/L）	0.3（1+）	3.51	1.1	137	107	half a month	0	0	0	Ⅱ	0
1607	M	43	2017-11-16 11:25:38	IgA	36.8	110	87.67	2.0（2+）（mg/L）	0.7（1+）	19.03	1.07	116	78	0	0	0	0	Ⅱ	0
1608	F	34	2017-11-13 11:29:56	LN	29.7	47	100.61	0.6（1+）（mg/L）	0.1（+-）	0.65	0.78	120	74	0	0	0	0	0	0
1609	M	64	2017-11-13 11:19:23	MN	20.3	50	136.76	0.3（+-）（mg/L）	1.0（2+）	4.5	3.5	142	80	0	0	0	0	0	1
1610	M	51	2017-11-13 11:19:07	MN	21	99	62.79	0.3（+-）（mg/L）	2.0（2+）	4.28	7.56	129	63	0	0	0	0	Ⅱ	1
1611	M	49	2017-11-09 11:35:33	MN	21.4	70	117.71	2.0（2+）（mg/L）	3.0（3+）	10.01	3.05	145	99	3 years	5 years	0	0	0	0
1612	M	68	2017-11-09 11:35:25	ANCA-associated glomerulonephritis	34.1	275	37.23	10（3+）（mg/L）	0.3（1+）	180.5	0.6	148	87	2 years	2 years	0	0	Ⅲ	0
1613	F	55	2017-11-09 11:35:15	LN	28.6	66	91.62	0.6（1+）（mg/L）	3.0（3+）	1.94	0.28	158	94	6 years	0	0	0	0	1
1614	F	76	2017-11-06 12:21:51	DN	36	703	21.81	2.0（2+）（mg/L）	0.7（1+）	8.73	1.23	156	73	1 month	8 years	0	0	Ⅴ	0
1615	M	31	2017-11-06 12:21:00	IgA	41.4	54	109.96	2.0（2+）（mg/L）	0.2（+-）	51.84	3.05	91	61	0	0	0	0	0	0
1616	M	48	2017-11-06 11:29:00	DN	38.5	96	65.41	0.3（+-）（mg/L）	0.3（1+）	2.27	1.69	143	79	0	20 years	0	0	Ⅱ	0
1617	M	24	2017-11-06 11:28:50	IgA	45.9	80	105.76	2.0（2+）（mg/L）	0.5（1+）	24.41	0.81	134	76	0	0	0	0	0	0
1618	M	50	2017-11-02 11:46:37	IgA	33	221	46.77	0.3（+-）（mg/L）	1.0（2+）	9.99	2.32	155	99	3 years	0	0	0	Ⅲ	0
1619	M	52	2017-11-02 11:46:29	LN	21.2	124	42.5806	5.0（2+）（mg/L）	0.7（1+）	12.55	6.88	173	91	1 month	0	0	0	Ⅱ	1
1620	F	34	2017-11-02 11:18:12	IgA	48.1	42	143.65	-	0.5（1+）	2.57	0.68	130	87	1 year	3 months	0	0	0	0
1621	M	35	2017-11-02 11:18:00	ANCA-associated glomerulonephritis	34.5	749	28.83	5.0（2+）（mg/L）	0.7（1+）	56.66	1.09	116	80	0	0	0	1	0	0
1622	F	47	2017-10-30 11:28:06	LN	23.5	46	69.44	1.0（1+）（mg/L）	0.7（1+）	11.59	2.47	114	73	0	0	0	0	Ⅱ	0
1623	F	62	2017-10-26 11:48:42	MN	24.2	50	116.08	5.0（2+）（mg/L）	1.0（2+）	15.79	2.8	168	72	2 months	0	0	0	0	1
1624	M	73	2017-10-26 11:48:28	MN	17.5	101	70.05	2.0（2+）（mg/L）	3.0（3+）	13.63	11.48	145	72	4 years	0	0	0	Ⅱ	1
1625	M	37	2017-10-19 11:39:54	MN	27.1	73	75.36	-	6.0（4+）	2.34	3.76	143	99	0	The course of disease is unknown	0	0	0	1
1626	F	38	2017-10-19 11:39:46	IgA	34.2	185	45.09	0.3（+-）（mg/L）	0.7（1+）	0.95	1.19	139	88	2 years	0	0	0	Ⅲ	0
1627	M	84	2017-10-19 11:39:39	Renal Amyloidosis	23.8	83.2	40.3846	-	2.0（2+）	1.15	3.6	132	56	0	0	0	0	0	1
1628	M	41	2017-10-16 11:20:01	MN	20.3	106	78.31	5.0（2+）（mg/L）	3.0（3+）	7.25	2.79	108	79	3 years	0	0	1	Ⅱ	1
1629	F	49	2017-10-12 11:27:07	MN	23.2	49	108.53	Ca50（2+）	1.0（2+）	5	2.71	158	96	0	0	0	0	0	1
1630	M	44	2017-10-09 11:49:47	MCD	16.4	62	116.08	1.0（1+）（mg/L）	6.0（3+）	2.34	2.59	112	65	0	0	0	0	0	1
1631	F	22	2017-10-09 11:10:25	FSGS	35.6	94	130.46	-	5.0（3+）	2	6.96	141	91	0	0	0	0	0	1
1632	F	69	2017-09-28 12:00:30	MN	20.9	56	86.74	2.0（2+）（mg/L）	3.0（3+）	4.37	2.95	165	83	4 years	0	0	0	0	1
1633	F	45	2017-09-28 12:00:21	MN	18.9	52.8	136.76	1.0（1+）（mg/L）	6.0（3+）	10.78	8.11	123	82	0	0	0	0	0	1
1634	F	43	2017-09-28 11:25:29	MN	25.2	64	105.76	0.6（1+）（mg/L）	0.7（1+）	3.62	6.49	110	65	0	0	0	0	0	1
1635	M	45	2017-09-25 11:28:06	DN	23.9	66	93.72	10（3+）（mg/L）	3.0（3+）	42.35	3.34	171	101	First found	6 years	0	0	0	0
1636	F	29	2017-09-25 11:27:55	LN	18.9	91	84.92	10（3+）（mg/L）	6.0（3+）	0.95	8.52	107	70	0	0	0	0	0	1
1637	F	61	2017-09-21 11:20:56	IgM	34.4	67	136.76	5.0（2+）（mg/L）	0.7（1+）	51.88	0.88	130	69	0	0	0	0	0	0
1638	M	21	2017-09-21 11:20:45	MCD	22.2	75	108.53	0.6（1+）（mg/L）	6.0（3+）	0.52	1.77	135	83	0	0	0	0	0	1
1639	M	21	2017-09-18 11:03:41	MCD	15.8	59	168.91	2.0（2+）（mg/L）	6.0（3+）	1.06	6.43	121	88	0	0	0	0	0	1
1640	F	44	2017-09-14 12:08:25	MN	47.7	63	102.72	0.3（+-）（mg/L）	2.0（2+）	3.33	2.37	154	84	4 years	0	0	0	0	1
1641	F	29	2017-09-11 11:29:11	HSPN	35.8	45	156.72	5.0（2+）（mg/L）	0.5（1+）	60.16	0.97	98	65	0	0	0	0	0	0
1642	M	73	2017-09-11 11:27:48	DN	20.3	335	45.92	2.0（2+）（mg/L）	6.0（3+）	7.87	8.17	190	88	1 year	8 years	0	0	Ⅲ	1
1643	F	26	2017-09-07 12:30:59	IgA	27.5	43	136.76	10（3+）（mg/L）	0.7（1+）	176.38	3.05	109	67	0	0	0	0	0	1
1644	F	28	2017-09-07 12:30:44	IgA	34.8	166	55.21	10（3+）（mg/L）	0.7（1+）	164.21	1.48	146	92	0	0	0	0	Ⅲ	0
1645	M	69	2017-09-07 11:46:35	MN	23.5	136	68.24	0.3（+-）（mg/L）	0.7（1+）	3.58	2.55	126	80	0	0	0	0	Ⅱ	1
1646	M	63	2017-09-07 11:46:16	DN	25.8	186	48.25	0.6（1+）（mg/L）	1.0（2+）	2.52	1.85	179	92	1 week	10 years	0	1	Ⅲ	0
1647	M	72	2017-08-31 11:39:33	MN	20	109	73.96	2.0（2+）（mg/L）	3.0（3+）	3.29	3.05	157	95	10 years	0	0	0	Ⅱ	1
1648	M	17	2017-08-31 11:39:23	MCD	45.2	75	103.13	-	0.1（+-）	0.05	0.54	125	73	0	0	0	0	0	0
1649	M	54	2017-08-31 11:21:59	MN	30.8	73	65.41	-	0.3（1+）	1.21	3.05	146	97	10 years	0	0	0	Ⅱ	1
1650	M	52	2017-08-31 11:14:44	MCD	40.6	69	104.43	-	-	1.12	0.01	126	91	0	0	0	0	0	0
1651	M	45	2017-08-31 11:14:32	MN	38.2	79	91.62	2.0（2+）（mg/L）	0.7（1+）	9.27	1.53	134	80	0	0	0	0	0	0
1652	F	28	2017-08-28 11:36:52	IgA	17.1	60	128.48	5.0（2+）（mg/L）	6.0（4+）	10.57	3.05	123	70	0	0	0	0	0	1
1653	F	51	2017-08-24 12:38:54	LN	13.1	44	91.62	0.6（1+）（mg/L）	6.0（3+）	2.3	12.67	120	87	0	0	0	0	Ⅱ	1
1654	M	64	2017-08-24 12:38:43	IgG4	31.8	611	24.99	0.3（+-）（mg/L）	-	0.52	0.36	126	65	0	0	0	0	Ⅳ	0
1655	F	36	2017-08-24 12:38:33	IgA	39.6	179	90.6	0.6（1+）（mg/L）	1.0（2+）	2.23	2.46	164	107	0	0	0	0	Ⅲ	0
1656	F	32	2017-08-21 12:05:25	MCD	29.6	1046	36.13	5.0（2+）（mg/L）	0.2（+-）	10.24	0.32	126	74	0	0	0	1	0	0
1657	M	62	2017-08-17 11:26:17	MN	27.6	147	55.21	10（3+）（mg/L）	2.0（2+）	29.16	2.93	99	55	0	0	0	0	Ⅲ	0
1658	M	45	2017-08-17 11:26:06	MN	38.6	54	165.7	1.0（1+）（mg/L）	0.3（1+）	8.55	1.41	112	64	0	0	0	0	0	0
1659	F	54	2017-08-14 11:34:16	Alport syndrome	19.4	40	119.39	-	1.0（2+）	0.34	2.34	90	59	0	0	0	0	0	1
1660	F	46	2017-08-10 11:50:28	HBVN	39.9	46	91.62	5.0（2+）（mg/L）	3.0（3+）	35.21	3.81	132	87	0	0	0	0	0	1
1661	M	50	2017-08-10 11:50:18	MN	23.2	72	116.08	0.3（+-）（mg/L）	1.0（2+）	1.19	3.05	134	81	First found	0	0	0	0	1
1662	M	62	2017-08-07 12:17:39	MCD	18	140	64.34	5.0（2+）（mg/L）	6.0（4+）	17.46	2.63	133	86	10 years	0	0	1	0	1
1663	F	54	2017-08-07 12:17:29	MN	33.6	40	156.72	2.0（2+）（mg/L）	0.5（1+）	3.13	1.17	107	60	3 years	0	0	0	0	0
1664	F	28	2017-08-03 12:12:10	IgA	40.9	60	105.76	1.0（1+）（mg/L）	0.3（1+）	14.44	3.05	119	79	2 years	0	0	0	0	0
1665	M	29	2017-08-03 12:11:59	IgA	46.2	64	104.43	10（3+）（mg/L）	0.2（+-）	57.58	0.28	139	81	0	0	0	0	0	0
1666	M	61	2017-08-03 12:11:52	MN	21.3	97	99.4	1.0（1+）（mg/L）	3.0（3+）	22.3	6.74	121	76	10 years	First found	0	0	0	1
1667	M	28	2017-07-31 12:33:15	FSGS	14.8	179	70.68	2.0（2+）（mg/L）	6.0（4+）	8.87	5.86	143	111	0	0	0	1	0	1
1668	F	29	2017-07-31 12:33:00	IgA	21.9	476	85.82	0.6（1+）（mg/L）	3.0（3+）	1.21	1.69	112	85	0	0	0	0	0	1
1669	M	34	2017-07-31 12:32:49	MsPGN	43.4	71	134.61	-	0.5（1+）	2.34	0.42	126	81	0	0	0	0	0	0
1670	F	27	2017-07-31 12:32:34	MCD	17.1	61	108.53	2.0（2+）（mg/L）	6.0（3+）	12.98	6.24	129	106	0	0	0	0	0	1
1671	M	20	2017-07-31 11:36:11	HSPN	39.2	76	90.6	5.0（2+）（mg/L）	1.0（2+）	212.36	0.92	124	73	0	0	0	0	0	0
1672	M	51	2017-07-31 11:36:00	MN	25.7	60	107.13	2.0（2+）（mg/L）	2.0（2+）	109.84	4.28	100	62	0	4 years	0	0	Ⅰ	1
1673	M	58	2017-07-27 11:37:08	MN	31.9	69	138.98	0.6（1+）（mg/L）	-	0.58	5.5	166	101	8 years	0	0	0	0	0
1674	M	47	2017-07-24 12:27:31	LN	22.1	449	15.74	2.0（2+）（mg/L）	2.0（2+）	2.7	0.48	159	99	10 years	0	0	0	Ⅳ	0
1675	M	46	2017-07-24 12:05:28	MCD	22.1	79	109.96	-	0.7（1+）	0.45	7.32	114	76	0	0	0	0	0	1
1676	M	70	2017-07-24 11:37:18	MN	23.4	107	59.9	0.6（1+）（mg/L）	2.0（2+）	3.1	3.96	108	72	0	0	0	0	Ⅲ	1
1677	F	26	2017-07-24 09:20:30	MCD	22.6	74	77.55	2.0（2+）（mg/L）	1.0（2+）	13.18	5.56	123	93	0	0	0	0	0	1
1678	F	30	2017-07-24 09:20:03	IgA	41.7	48	138.98	10（3+）（mg/L）	0.5（1+）	122.56	0.43	125	80	0	0	0	0	0	0
1679	M	43	2017-07-20 11:29:00	MN	28.8	97	116.08	1.0（1+）（mg/L）	2.0（2+）	21.65	4.06	124	71	0	0	0	0	0	1
1680	F	54	2017-07-20 11:28:50	ANCA-associated glomerulonephritis	27.8	716	21.08	0.6（1+）（mg/L）	0.7（1+）	2.81	2.45	129	75	First found	0	0	0	Ⅳ	0
1681	F	27	2017-07-13 12:13:22	MN	23.5	36	141.28	0.6（1+）（mg/L）	1.0（2+）	5.4	1.73	128	81	0	0	0	0	0	0
1682	F	63	2017-07-13 12:13:12	MN	37.1	45	107.13	2.0（2+）（mg/L）	0.7（1+）	43.25	1.22	123	79	0	0	0	0	0	0
1683	M	63	2017-07-10 12:18:48	MN	32.7	58	101.86	-	0.7（1+）	2.34	2.38	158	94	0	0	0	0	0	1
1684	M	66	2017-07-10 12:18:39	DN	33.8	123	56.01	1.0（1+）（mg/L）	3.0（3+）	4.75	3.04	168	96	10 years	4 years	0	0	Ⅲ	1
1685	M	59	2017-07-10 12:18:26	MN	23.8	103	83.17	0.3（+-）（mg/L）	0.7（1+）	3.46	4.53	178	96	10 years	0	0	0	Ⅱ	1
1686	M	19	2017-07-10 11:14:13	Obesity-related glomerulopathy	21.1	78	117.71	1.0（1+）（mg/L）	6.0（3+）	1.22	9.71	149	94	0	0	0	0	0	1
1687	M	31	2017-07-06 12:01:11	IgA	36.5	91	111.44	1.0（1+）（mg/L）	2.0（2+）	29.92	1.78	115	68	0	0	0	0	0	0
1688	F	61	2017-07-06 12:01:02	MCD	46.2	48	130.46	1.0（1+）（mg/L）	-	5.45	0.19	120	80	0	0	0	0	0	0
1689	M	71	2017-07-06 12:00:52	MN	27.8	62	122.87	2.0（2+）（mg/L）	2.0（2+）	12.17	4.44	172	88	First found	0	0	0	0	1
1690	M	43	2017-07-06 12:00:06	MN	17.6	59	51.16	0.6（1+）（mg/L）	2.0（2+）	21.46	5.08	134	86	0	0	0	0	Ⅲ	1
1691	M	59	2017-07-03 11:29:51	FSGS	25.3	257	21.28	1.0（1+）（mg/L）	6.0（3+）	13.88	6.65	143	82	1 year	0	0	1	Ⅳ	1
1692	M	45	2017-06-29 11:39:46	IgA	40.9	112	86.74	1.0（1+）（mg/L）	2.0（2+）	13.03	1.23	151	109	1 week	0	0	0	Ⅱ	0
1693	F	51	2017-06-29 11:39:33	LN	24.5	66	94.81	2.0（2+）（mg/L）	-	2.18	7.27	136	70	0	0	0	1	0	1
1694	M	34	2017-06-26 11:52:04	HBVN	20.9	50	95.92	2.0（2+）（mg/L）	3.0（3+）	13.27	3.2	125	75	0	0	0	0	0	1
1695	M	53	2017-06-26 11:51:50	IgA	43.3	62.9	108.53	10（3+）（mg/L）	1.0（2+）	85.75	0.3	120	73	0	0	0	0	0	0
1696	M	55	2017-06-22 11:32:17	MN	30.6	75	148.62	0.3（+-）（mg/L）	0.5（1+）	2	1.09	116	73	0	3 years	0	0	0	1
1697	F	32	2017-06-19 11:13:30	IgA	39.3	48	156.72	10（3+）（mg/L）	-	19.85	3.05	92	76	0	0	0	0	0	0
1698	F	26	2017-06-15 11:55:54	LN	22.2	83	76.81	2.0（2+）（mg/L）	2.0（2+）	7.33	2.44	137	80	0	0	0	0	0	0
1699	M	48	2017-06-14 11:26:31	TIN	28.5	756	11.51	10（3+）（mg/L）	1.0（2+）	66.83	3.05	134	94	0	0	0	1	0	0
1700	M	69	2017-06-12 12:04:33	MN	26.2	97	73.96	1.0（1+）（mg/L）	2.0（2+）	10.96	8.8	128	61	5 months	0	0	0	0	1
1701	M	48	2017-06-12 12:04:23	DN	23	159	67.65	1.0（1+）（mg/L）	3.0（3+）	22.37	7.43	130	86	10 days	8 years	0	0	Ⅱ	1
1702	M	44	2017-06-08 11:53:57	Hypertensive Renal Disease	38.6	87	126.56	10（3+）（mg/L）	0.3（1+）	19.73	1.22	170	120	1 year	0	0	0	0	0
1703	F	32	2017-06-08 11:53:47	MCD	25.6	44	179.29	1.0（1+）（mg/L）	6.0（3+）	1.19	6.35	114	71	0	0	0	0	0	1
1704	M	62	2017-06-05 11:27:25	ANCA-associated glomerulonephritis	44.3	277	32.89	2.0（2+）（mg/L）	0.7（1+）	22.9	1.85	140	82	2 years	0	0	1	Ⅲ	0
1705	F	15	2017-06-01 11:39:47	MCD	17.9	61	103.13	2.0（2+）（mg/L）	3.0（3+）	2.32	6.28	136	94	0	0	0	0	0	1
1706	M	43	2017-06-01 11:39:36	HBVN	22.4	65.4	126.56	5.0（2+）（mg/L）	0.7（1+）	143.15	3.93	147	68	First found	0	0	0	0	1
1707	M	76	2017-06-01 11:39:25	MN	27.6	109	69.44	0.6（1+）（mg/L）	0.7（1+）	5.98	3.04	113	61	4 years	0	0	0	Ⅱ	1
1708	M	30	2017-05-25 12:23:46	IgA	40.3	123	92.66	1.0（1+）（mg/L）	0.7（1+）	22.37	0.88	140	91	First found	0	0	0	Ⅰ	0
1709	F	26	2017-05-25 12:23:23	MCD	29	43	136.76	2.0（2+）（mg/L）	0.2（+-）	0.52	3.05	131	90	0	0	0	0	0	1
1710	M	71	2017-05-25 12:23:08	MN	21.8	53	87.67	-	0.7（1+）	0.77	18.97	121	65	0	0	1	0	0	1
1711	F	23	2017-05-25 12:22:59	IgA	32.4	57	122.87	5.0（2+）（mg/L）	0.7（1+）	16.43	0.69	103	62	0	0	0	0	0	0
1712	M	52	2017-05-25 12:22:38	DN	29.9	373	29.54	-	1.0（2+）	0.9	3.96	158	83	2 years	30 years	0	1	Ⅳ	1
1713	F	30	2017-05-22 11:51:22	MN	35.3	52	134.59	2.0（2+）（mg/L）	0.7（1+）	26.21	0.52	124	79	0	0	0	0	0	0
1714	M	61	2017-05-22 11:49:03	HBVN	18.1	90	75.36	2.0（2+）（mg/L）	6.0（3+）	5.35	4.74	113	70	0	0	0	0	0	1
1715	M	26	2017-05-22 11:48:54	IgA	43.3	61	117.71	2.0（2+）（mg/L）	0.7（1+）	12.91	0.7	139	86	2 months	0	0	0	0	0
1716	M	15	2017-05-22 11:48:45	IgA	20.9	45	132.5	-	1.0（2+）	2.34	0.46	129	79	0	0	0	0	0	1
1717	M	17	2017-05-22 11:48:31	MN	21.1	70	72.62	2.0（2+）（mg/L）	3.0（3+）	24.01	2.28	114	71	0	0	0	0	0	1
1718	M	64	2017-05-18 11:42:39	MN	25.1	68	156.72	2.0（2+）（mg/L）	2.0（2+）	4.77	7.54	164	82	First found	0	0	0	0	1
1719	M	26	2017-05-18 11:42:25	HSPN	39	80	84.03	5.0（2+）（mg/L）	0.1（+-）	12.82	0.42	105	70	0	0	0	0	0	0
1720	F	47	2017-05-18 11:42:11	MN	25.8	48	153.93	0.3（+-）（mg/L）	3.0（3+）	5.4	7.87	144	90	5 years	0	0	0	0	1
1721	M	16	2017-05-15 11:50:02	MCD	18.9	73	76.08	2.0（2+）（mg/L）	0.5（1+）	12.65	3.65	130	82	6 months	0	0	0	0	1
1722	M	36	2017-05-11 11:55:26	MN	19.6	71	109.96	0.3（+-）（mg/L）	2.0（2+）	24.91	4.53	131	82	0	0	0	0	0	1
1723	M	64	2017-05-11 11:19:44	MN	24.2	61	122.87	0.6（1+）（mg/L）	6.0（3+）	17.14	2.04	122	70	10 years	0	0	0	0	1
1724	M	37	2017-05-08 12:15:30	Hypertensive Renal Disease	34.9	134	84.92	-	3.0（3+）	1.33	2.9	176	111	1 year	0	0	0	Ⅲ	0
1725	F	50	2017-05-08 12:15:09	MN	44.1	55.2	108.53	0.6（1+）（mg/L）	0.5（1+）	1.93	4.43	137	71	0	0	0	0	0	0
1726	F	71	2017-05-08 12:14:57	MN	34.2	40	107.13	2.0（2+）（mg/L）	2.0（2+）	11.75	4.38	118	60	2 years	8 years	0	0	0	0
1727	M	71	2017-05-04 12:22:05	MCD	20.2	50	99.4	2.0（2+）（mg/L）	3.0（3+）	6.03	7.75	139	81	0	0	0	0	0	1
1728	F	31	2017-05-04 12:21:56	IgA	36	77.3	107.13	10（3+）（mg/L）	2.0（2+）	481.41	1.39	106	82	0	0	0	0	0	0
1729	M	21	2017-05-04 12:21:47	IgA	38.9	101	117.71	10（3+）（mg/L）	0.7（1+）	50.02	1.07	124	76	0	0	0	0	0	0
1730	F	51	2017-05-04 12:21:37	IgA	23.4	56	117.71	10（3+）（mg/L）	2.0（2+）	108.65	6.66	101	63	0	0	0	0	0	1
1731	F	22	2017-04-27 15:02:21	LN	31.8	28	134.59	2.0（2+）（mg/L）	0.3（1+）	54.99	0.8	111	74	0	0	0	0	0	0
1732	M	20	2017-04-27 15:02:06	FSGS	27.1	65	103.13	-	-	0.2	0.14	101	64	0	0	0	0	0	1
1733	M	30	2017-04-20 12:28:01	IgA	39	76	112.94	2.0（2+）（mg/L）	0.7（1+）	56.32	1.21	135	76	0	0	0	0	0	0
1734	M	48	2017-04-20 12:27:54	DN	29.7	171	51.16	1.0（1+）（mg/L）	6.0（3+）	13.14	17.39	135	72	half a year	half a year	0	0	Ⅲ	1
1735	F	38	2017-04-20 12:27:47	IgA	43.5	45	153.93	2.0（2+）（mg/L）	0.5（1+）	11.5	0.6	114	74	0	0	0	0	0	0
1736	M	79	2017-04-20 12:27:39	MN	25.7	62	97.05	2.0（2+）（mg/L）	3.0（3+）	7.09	0.46	152	62	First found	0	0	0	0	1
1737	F	33	2017-04-17 12:00:05	FSGS	32.4	155	68.24	5.0（2+）（mg/L）	0.7（1+）	6.25	1.5	105	84	0	0	0	0	Ⅲ	0
1738	M	55	2017-04-13 11:51:34	HBVN	19.8	147	60.83	1.0（1+）（mg/L）	6.0（3+）	6.68	10.79	145	75	2 years	0	0	0	Ⅲ	1
1739	M	63	2017-04-13 11:51:27	HBVN	19.2	101	89.61	1.0（1+）（mg/L）	6.0（3+）	9.43	11.89	160	81	2 years	3 years	0	0	0	1
1740	M	16	2017-04-10 15:05:40	MCD	17.7	196	49.51	2.0（2+）（mg/L）	6.0（3+）	4.63	1.03	149	99	0	0	0	1	0	1
1741	M	41	2017-04-10 15:05:22	MN	21.3	53.2	153.93	1.0（1+）（mg/L）	3.0（3+）	21.69	5.39	137	93	0	0	0	0	0	1
1742	M	61	2017-04-10 15:05:11	DN	25.7	137	71.31	0.6（1+）（mg/L）	2.0（2+）	4.16	5.52	135	77	2 years	1 year	0	0	Ⅱ	1
1743	F	38	2017-04-10 11:40:55	IgA	30.7	144	50.49	2.0（2+）（mg/L）	1.0（2+）	7.88	1.54	161	102	0	0	0	0	Ⅲ	0
1744	M	29	2017-04-10 11:40:43	IgA	39.4	78	95.92	5.0（2+）（mg/L）	0.3（1+）	49.73	0.46	134	82	half a month	0	0	0	0	0
1745	F	35	2017-04-06 11:20:40	MCD	26.7	45	141.28	-	1.0（2+）	5.4	4.58	135	75	0	0	0	0	0	1
1746	F	66	2017-03-30 12:04:17	DN	21.5	89	83.17	2.0（2+）（mg/L）	6.0（3+）	47.9	3.05	140	70	3 months	2 years	0	0	0	1
1747	M	66	2017-03-30 12:04:09	MN	23	57	112.94	1.0（1+）（mg/L）	6.0（3+）	3.24	13.63	144	73	First found	0	0	0	0	1
1748	F	64	2017-03-30 12:04:00	MN	23.2	62	112.94	0.6（1+）（mg/L）	2.0（2+）	3.26	2.46	143	73	20 days	0	0	0	0	1
1749	F	64	2017-03-27 12:40:47	MPGN	26.3	61	82.32	2.0（2+）（mg/L）	2.0（2+）	47.65	3.39	165	86	1 year	0	0	0	0	1
1750	F	54	2017-03-27 12:40:33	MN	22.8	45	114.49	2.0（2+）（mg/L）	0.7（1+）	4.3	4.73	147	102	3 years	3 years	0	0	0	1
1751	F	33	2017-03-27 12:40:25	ANCA-associated glomerulonephritis	27.5	794	22.15	10（3+）（mg/L）	2.0（2+）	55.22	2.16	130	70	0	0	0	0	Ⅴ	0
1752	M	60	2017-03-27 12:40:17	Hypertensive Renal Disease	19.7	382	30.28	2.0（2+）（mg/L）	6.0（3+）	34.81	0.62	181	95	5 years	0	0	0	Ⅳ	1
1753	F	49	2017-03-23 12:14:35	MN	24.6	36	165.7	1.0（1+）（mg/L）	3.0（3+）	10.53	7.04	167	78	First found	0	0	0	0	1
1754	M	16	2017-03-23 12:14:28	MCD	17.8	71	111.44	1.0（1+）（mg/L）	6.0（3+）	0.97	12.82	122	78	0	0	0	0	0	1
1755	M	23	2017-03-23 12:14:21	IgA	40.1	95	88.63	2.0（2+）（mg/L）	0.1（+-）	5.47	0.27	149	114	0	0	0	0	Ⅱ	0
1756	F	33	2017-03-23 12:14:11	C1q	43.4	42	141.28	-	0.7（1+）	0.25	1.12	135	75	0	0	0	0	0	0
1757	M	38	2017-03-20 12:04:06	MN	27.5	68	114.49	1.0（1+）（mg/L）	2.0（2+）	2.34	2.81	118	83	0	0	0	0	0	1
1758	M	48	2017-03-20 12:03:56	MN	39.9	69	99.4	0.3（+-）（mg/L）	1.0（2+）	1.19	1.3	142	85	0	0	0	0	0	0
1759	M	55	2017-03-16 11:25:26	MN	25.5	57	116.08	1.0（1+）（mg/L）	2.0（2+）	5.09	6.42	125	75	0	0	0	0	0	1
1760	F	29	2017-03-13 12:09:54	HSPN	36.6	51	136.76	10（3+）（mg/L）	0.7（1+）	52.74	1.05	124	66	0	4 years	0	0	0	0
1761	F	42	2017-03-13 11:41:17	DN	34.2	155	65.41	-	0.3（1+）	-	6.55	121	87	1 month	1 month	0	0	Ⅱ	0
1762	M	64	2017-03-09 12:08:38	IgA	27.1	65	88.63	-	1.0（2+）	2.34	4.73	126	80	0	0	0	0	0	1
1763	M	38	2017-03-09 12:08:13	MN	27.8	78	103.13	0.3（+-）（mg/L）	6.0（3+）	1.28	3.92	119	71	0	0	0	0	0	1
1764	F	40	2017-03-06 12:17:09	FSGS	21.3	59	105.76	0.6（1+）（mg/L）	0.7（1+）	4.45	3.41	145	92	0	0	0	0	0	1
1765	F	43	2017-03-06 12:16:59	IgA	40.2	62	128.48	2.0（2+）（mg/L）	0.7（1+）	7.07	1.14	117	74	0	0	0	0	0	0
1766	M	29	2017-03-02 11:26:43	Hypertensive Renal Disease	44.2	176	71.31	-	0.7（1+）	1.94	1.62	191	129	First found	0	0	0	Ⅱ	0
1767	M	37	2017-02-27 11:57:40	Hypertensive Renal Disease	41.1	153	71.31	-	0.2（+-）	0.45	0.5	167	98	2 years	0	0	0	Ⅱ	0
1768	M	61	2017-02-27 11:57:31	MN	22.8	80	92.66	0.3（+-）（mg/L）	2.0（2+）	6.01	10.66	125	65	half a year	0	0	0	0	1
1769	F	52	2017-02-27 11:57:20	MN	27.1	61	98.21	Ca10（1+）	5.0（3+）	13.2	1.09	98	71	0	0	0	0	0	1
1770	F	68	2017-02-23 11:34:44	HBVN	22.8	64	89.61	0.3（+-）（mg/L）	2.0（2+）	2.32	7.3	168	89	4 years	0	0	0	0	1
1771	M	35	2017-02-23 11:34:34	DN	32.9	449	38.58	0.6（1+）（mg/L）	3.0（3+）	1.46	10.21	150	95	2 years	12 years	0	0	Ⅲ	0
1772	M	37	2017-02-16 11:33:57	IgA	40.9	68	87.67	10（3+）（mg/L）	0.2（+-）	9.29	0.51	129	74	0	0	0	0	0	0
1773	M	57	2017-02-13 11:53:01	HBVN	18	93	107.13	1.0（1+）（mg/L）	6.0（3+）	5.17	7.88	140	95	0	0	0	0	0	1
1774	F	50	2017-02-13 11:52:44	HSPN	27.8	599	25.26	2.0（2+）（mg/L）	2.0（2+）	3.26	3.34	160	90	1 year	0	0	0	Ⅳ	0
1775	M	27	2017-02-09 11:21:18	HSPN	30.2	60	186.91	2.0（2+）（mg/L）	2.0（2+）	38.27	3.28	158	110	First found	0	0	0	0	0
1776	M	50	2017-02-06 11:32:32	MN	22.5	81.3	100.61	7.5（3+）(mg/L)	10（4+）	1.04	9.08	157	98	0	0	0	0	0	1
1777	F	64	2017-01-19 12:09:26	MN	23.3	59	104.43	1.0（1+）（mg/L）	6.0（3+）	10.1	4.96	130	89	0	0	0	0	0	1
1778	M	58	2017-01-19 12:09:05	MCD	19.8	190	42.07	0.6（1+）（mg/L）	6.0（3+）	3.87	9.21	148	81	First found	0	0	0	Ⅲ	1
1779	M	62	2017-01-19 12:08:56	MN	25.7	95	82.32	0.6（1+）（mg/L）	2.0（2+）	2.38	10.95	155	102	half a year	8 years	0	0	0	1
1780	F	35	2017-01-16 11:56:53	IgA	29.5	77	109.96	5.0（2+）（mg/L）	3.0（3+）	35.96	5.98	119	85	0	0	0	0	0	1
1781	M	60	2017-01-16 11:56:45	Renal Amyloidosis	18.3	120	78.31	0.3（+-）（mg/L）	1.0（2+）	3.15	6.47	147	87	0	0	0	0	Ⅱ	1
1782	F	55	2017-01-16 11:56:36	MN	28.3	43	93.72	0.6（1+）（mg/L）	6.0（3+）	20.18	1.05	107	78	0	0	0	0	0	1
1783	F	46	2017-01-12 11:42:27	IgA	38.9	77	98.21	10（3+）（mg/L）	0.7（1+）	6.43	0.77	109	68	0	0	0	0	0	0
1784	M	52	2017-01-12 11:42:18	MN	16.3	96	41.14	1.0（1+）（mg/L）	2.0（2+）	2.34	6.7	144	98	0	0	0	1	0	1
1785	F	38	2017-01-09 11:58:52	MN	21.9	54	138.98	1.0（1+）（mg/L）	2.0（2+）	8.48	5.18	129	87	0	0	0	0	0	1
1786	M	65	2017-01-09 11:58:44	MCD	36	58	138.98	1.0（1+）（mg/L）	2.0（2+）	19.94	0.49	124	69	0	0	0	0	0	0
1787	M	73	2017-01-09 11:25:59	MN	16.5	109	56.83	1.0（1+）（mg/L）	3.0（3+）	4.79	4.49	121	84	0	0	0	1	0	1
1788	M	47	2017-01-09 11:25:51	MN	22.5	84	76.08	-	1.0（2+）	0	2.6	143	88	0	0	0	0	0	1
1789	F	24	2017-01-05 11:42:14	LN	23.2	69	75.36	-	3.0（3+）	1.01	3.05	123	90	0	0	0	1	0	0
1790	F	74	2017-01-05 11:42:06	MCD	20.4	507	35.78	5.0（2+）（mg/L）	6.0（4+）	24.43	1.3	152	82	4 years	0	0	1	0	1
1791	M	67	2017-01-05 11:41:59	MN	21.1	82	81.49	2.0（2+）（mg/L）	2.0（2+）	5.92	7.2	131	81	0	0	0	0	0	1
1792	M	70	2017-01-05 11:41:52	ANCA-associated glomerulonephritis	28.4	435	25.44	2.0（2+）（mg/L）	0.7（1+）	3.71	2.11	154	66	5 years	7 months	0	1	0	0
1793	F	22	2017-01-05 11:41:44	MN	22.5	44	132.5	1.0（1+）（mg/L）	3.0（3+）	14.51	6.83	125	79	0	0	0	0	0	1
1794	M	81	2017-01-05 11:41:31	ANCA-associated glomerulonephritis	28.6	225	48.87	5.0（2+）（mg/L）	2.0（2+）	56.66	6.69	88	53	0	0	0	0	Ⅲ	1
1795	F	67	2017-01-03 11:15:37	MCD	19.3	99	109.96	-	6.0（3+）	1.85	6.33	143	75	0	0	0	0	0	1
1796	M	20	2016-12-29 11:58:33	MsPGN	40.4	115	76.81	5.0（2+）（mg/L）	1.0（2+）	18.11	2.46	127	86	0	0	0	0	Ⅱ	0
1797	F	40	2016-12-29 11:58:19	IgA	26.6	51	119.39	-	3.0（3+）	0.81	4.38	125	75	0	0	0	0	0	1
1798	M	40	2016-12-29 11:58:06	MN	31.64	41.0678	146.1	-	2.0（2+）	0	3.1	133	80	0	0	0	0	0	0
1799	M	47	2016-12-26 11:40:30	MN	22.1	79	105.76	2.0（2+）（mg/L）	2.0（2+）	60.01	4.69	132	68	0	0	0	0	0	1
1800	M	33	2016-12-22 11:59:12	IgA	42.3	76	86.74	2.0（2+）（mg/L）	0.5（1+）	17.48	0.82	127	66	0	0	0	0	0	0
1801	F	75	2016-12-22 11:59:02	MCD	33.6	153	29.3	10（3+）（mg/L）	0.3（1+）	39.02	0.87	123	60	3 years	First found	0	0	Ⅳ	0
1802	M	61	2016-12-19 11:39:36	MN	26.6	87	83.17	0.6（1+）（mg/L）	2.0（2+）	9.52	12.51	138	91	0	0	0	0	0	1
1803	M	47	2016-12-15 11:41:01	MN	19.5	70	73.28	2.0（2+）（mg/L）	3.0（3+）	36.59	7.85	138	97	half a year	0	0	0	0	1
1804	M	34	2016-12-15 11:40:51	MN	15.7	81	81.49	1.0（1+）（mg/L）	2.0（2+）	11.11	7.93	135	83	0	0	0	0	0	1
1805	F	67	2016-12-12 11:32:03	ANCA-associated glomerulonephritis	35.7	545	15.74	5.0（2+）（mg/L）	1.0（2+）	112.97	3.63	147	59	1 month	0	0	0	Ⅳ	0
1806	F	62	2016-12-08 12:10:31	multiple myeloma related nephropathy	43.7	263	15.3	0.6（1+）（mg/L）	0.1（+-）	1.01	0.7	123	67	0	0	0	1	0	0
1807	F	45	2016-12-08 12:10:22	MCD	42	133	52.21	-	0.7（1+）	0.92	0.88	149	89	2 years	0	1	0	Ⅲ	0
1808	F	63	2016-12-08 12:10:13	MN	43.4	62	99.4	-	0.5（1+）	0.18	0.26	112	70	2 years	0	0	0	0	0
1809	M	44	2016-12-05 11:19:56	Drug-induced Kidney Injury	39.3	157	48.87	-	-	0.7	0.14	120	79	0	0	0	0	Ⅲ	0
1810	F	65	2016-12-01 12:07:57	ANCA-associated glomerulonephritis	37.4	584	18.04	2.0（2+）（mg/L）	0.2（+-）	13.88	0.85	126	70	3 years	3 years	0	0	Ⅳ	0
1811	F	28	2016-12-01 12:07:46	C3	36.2	63	88.63	10（3+）（mg/L）	0.7（1+）	125.15	1.05	109	71	0	0	0	0	0	0
1812	F	59	2016-11-28 12:17:33	ANCA-associated glomerulonephritis	33.1	286	23.65	5.0（2+）（mg/L）	0.7（1+）	67.73	1.32	141	85	0	0	0	1	0	0
1813	M	39	2016-11-28 12:17:26	Hypertensive Renal Disease	38.4	680	17.85	0.6（1+）（mg/L）	0.7（1+）	1.46	3.78	160	90	1 month	0	0	0	Ⅳ	0
1814	F	46	2016-11-28 12:17:18	Hypertensive Renal Disease	31.64	83	80.67	1.0（1+）（mg/L）	0.3（1+）	2.84	0.93	134	89	7 years	0	0	0	0	0
1815	F	72	2016-11-28 12:17:09	FSGS	40.2	195	50.49	-	-	0.29	0.11	150	82	0	7 years	0	0	Ⅲ	0
1816	M	44	2016-11-28 12:17:01	MN	27.2	52	107.13	-	0.2（+-）	2.34	1.2	137	87	0	0	0	0	0	1
1817	M	42	2016-11-28 12:16:52	IgA	41.4	72	93.72	2.0（2+）（mg/L）	0.5（1+）	6.75	0.73	122	80	0	0	0	0	0	0
1818	F	14	2016-11-24 11:46:52	Crescentic glomerulonephritis	20.3	80	81.49	10（3+）（mg/L）	3.0（3+）	780.07	6.19	115	72	0	0	0	0	0	1
1819	M	23	2016-11-21 11:28:14	MN	24.5	80	99.4	0.6（1+）（mg/L）	3.0（3+）	14.29	13.4	145	93	First found	0	0	0	0	1
1820	M	34	2016-11-21 11:28:06	IgA	41.8	142	64.34	0.6（1+）（mg/L）	0.5（1+）	4.82	3.05	132	83	2 months	0	0	0	Ⅲ	0
1821	F	59	2016-11-17 11:35:42	TIN	20.2	62	70.68	2.0（2+）（mg/L）	6.0（3+）	11.68	4.42	120	75	0	0	0	1	0	1
1822	F	15	2016-11-10 12:13:53	IgA	13.7	39.3	89.61	1.0（1+）（mg/L）	6.0（3+）	20.39	1.6	105	66	0	0	0	1	0	1
1823	F	55	2016-11-10 12:13:45	LN	24.5	84	70.05	2.0（2+）（mg/L）	3.0（3+）	4.86	8.06	190	115	10 years	0	0	0	Ⅱ	1
1824	M	32	2016-11-10 11:56:50	IgA	38.1	82	134.59	10（3+）（mg/L）	0.1（+-）	165.11	0.17	122	78	0	0	0	0	0	0
1825	M	32	2016-11-10 11:56:42	Alport syndrome	44.7	63	102.857	-	-	0.13	3.05	110	67	0	0	0	0	0	0
1826	M	47	2016-11-07 12:09:59	MN	20.8	84	94.81	1.0（1+）（mg/L）	3.0（3+）	8.23	4.36	151	101	10 years	0	0	0	0	1
1827	M	48	2016-11-07 12:09:51	MCD	20.5	145	37.23	2.0（2+）（mg/L）	6.0（4+）	140.42	3.05	106	63	0	0	0	1	0	1
1828	M	50	2016-11-03 11:47:41	MN	19.6	95	63.81	2.0（2+）（mg/L）	6.0（3+）	52.97	13.79	146	73	1 month	0	0	0	0	1
1829	F	39	2016-11-03 11:47:30	LN	23.6	54	45.92	5.0（2+）（mg/L）	2.0（2+）	2.95	6.95	181	117	3 years	0	0	0	Ⅲ	1
1830	M	23	2016-10-31 11:33:25	FSGS	41.2	92	65.96	-	0.3（1+）	2.34	1.27	106	78	1 year	0	0	0	Ⅱ	0
1831	M	69	2016-10-27 11:35:36	multiple myeloma related nephropathy	24.7	780	25.44	0.3（+-）（mg/L）	6.0（3+）	1.51	11.94	140	80	10 years	0	0	1	0	1
1832	F	41	2016-10-24 11:41:17	IgA	41.3	67	124.69	2.0（2+）（mg/L）	0.2（+-）	10.84	0.39	114	79	0	0	0	0	0	0
1833	F	58	2016-10-24 11:41:05	MCD	17.3	81	86.74	1.0（1+）（mg/L）	6.0（3+）	2.3	10.27	104	72	0	0	0	0	0	1
1834	F	62	2016-10-20 11:27:06	DN	39.3	76	79.87	0.6（1+）（mg/L）	2.0（2+）	2.81	2.96	143	65	3 years	11 year	0	0	0	0
1835	F	29	2016-10-13 11:26:21	LN	37.2	62	99.4	-	2.0（2+）	0.81	0.64	110	67	0	0	0	0	0	0
1836	M	42	2016-10-10 10:54:18	MCD	16.8	78	92.66	1.0（1+）（mg/L）	6.0（4+）	2.11	9	120	80	0	0	0	0	0	1
1837	M	37	2016-09-26 13:59:11	FSGS	22	116	52.57	5.0（2+）（mg/L）	6.0（3+）	30.56	3.09	126	76	First found	0	0	1	0	1
1838	M	77	2016-09-26 13:58:59	MCD	19.2	118	69.44	0.6（1+）（mg/L）	3.0（3+）	0.72	3.05	155	72	20 years	0	0	0	Ⅱ	1
1839	F	47	2016-09-22 11:34:04	MN	35.3	45	143.65	2.0（2+）（mg/L）	0.7（1+）	15.1	2.7	195	102	First found	0	0	0	0	0
1840	M	26	2016-09-22 11:17:21	IgA	39.9	110	93.72	2.0（2+）（mg/L）	0.7（1+）	8.06	0.74	136	86	0	0	0	0	Ⅰ	0
1841	F	54	2016-09-19 12:51:22	Crescentic glomerulonephritis	33.8	728	10.52	10（3+）（mg/L）	1.0（2+）	201.56	0.46	147	83	First found	0	0	1	Ⅲ	0
1842	F	45	2016-09-19 12:51:12	MCD	40.9	75	88.63	5.0（2+）（mg/L）	1.0（2+）	60.84	3.05	137	82	1 year	0	0	0	0	0
1843	F	71	2016-09-19 12:51:01	TIN	16.8	198	33.65	1.0（1+）（mg/L）	1.0（2+）	6.84	4.25	169	91	First found	0	0	0	0	1
1844	F	63	2016-09-19 12:50:50	LN	21.3	78	50.16	5.0（2+）（mg/L）	3.0（3+）	25.74	11.9	158	74	1 year	0	0	0	0	1
1845	M	30	2016-09-08 12:07:57	MN	14.8	81	70.05	10（3+）（mg/L）	6.0（3+）	248.62	8.28	122	76	0	0	0	0	0	1
1846	M	62	2016-09-08 12:07:49	MN	30	89	71.96	0.3（+-）（mg/L）	2.0（2+）	4.12	7.49	136	71	8 years	0	0	0	0	1
1847	M	28	2016-09-08 12:07:24	multiple myeloma related nephropathy	45.4	133	57.68	-	-	0.27	0.17	103	75	0	0	0	1	0	0
1848	F	30	2016-09-05 12:16:26	LN	25.7	59	83.17	-	1.0（2+）	0.32	3.34	130	80	0	0	0	0	0	0
1849	F	53	2016-09-05 12:16:16	LN	19.1	202	27.93	2.0（2+）（mg/L）	3.0（3+）	11.75	7.47	143	76	First found	8 years	0	0	Ⅳ	1
1850	M	70	2016-09-05 12:16:02	MCD	17.6	118	46.48	2.0（2+）（mg/L）	6.0（3+）	53.23	4.87	139	91	The course of disease is unknown	0	0	0	Ⅲ	1
1851	F	35	2016-09-01 12:11:45	LN	15.3	101	50.49	2.0（2+）（mg/L）	0.5（1+）	4.7	0.78	122	78	First found	0	0	0	Ⅱ	1
1852	F	28	2016-09-01 12:11:30	IgA	37.5	63	109.96	10（3+）（mg/L）	0.3（1+）	170.33	0.61	99	58	0	0	0	0	0	0
1853	F	38	2016-09-01 12:11:22	IgA	38.5	71	111.44	2.0（2+）（mg/L）	0.3（1+）	1.71	1.25	115	68	0	0	0	0	0	0
1854	M	60	2016-09-01 12:11:14	DN	19.3	146	47.06	2.0（2+）（mg/L）	3.0（3+）	7.88	14.42	163	86	7 years	18 years	0	0	Ⅲ	1
1855	M	58	2016-08-29 11:39:34	MN	20.4	71	104.43	Ca10（1+）Ery/ul	5.0（3+）	2	4.3	111	63	0	0	0	0	0	1
1856	M	37	2016-08-25 15:55:42	HBVN	36.6	56	94.81	5.0（2+）（mg/L）	1.0（2+）	1.1	1.22	120	75	0	0	0	0	0	0
1857	F	39	2016-08-25 15:55:34	MCD	38.1	47	148.62	0.3（+-）（mg/L）	-	5.51	0.77	90	60	0	0	0	0	0	0
1858	F	42	2016-08-18 11:45:57	IgA	37.2	55	121.11	1.0（1+）（mg/L）	0.7（1+）	7.38	3.05	169	103	7 years	0	0	0	0	0
1859	F	30	2016-08-18 11:45:49	MCD	39.2	56	128.48	5.0（2+）（mg/L）	-	38.39	3.05	118	65	0	0	0	0	0	0
1860	M	60	2016-08-15 12:37:35	ANCA-associated glomerulonephritis	30.1	417	18.63	5.0（2+）（mg/L）	0.2（+-）	105.71	0.54	147	84	0	0	0	1	0	0
1861	F	43	2016-08-15 12:37:27	IgA	41	98	76.08	1.0（1+）（mg/L）	0.7（1+）	2.16	2.19	129	73	2 years	0	0	0	Ⅱ	0
1862	F	63	2016-06-16 12:00:41	MN	21.4	42	103.13	0.6（1+）（mg/L）	6.0（3+）	7.47	2.94	140	74	4 years	10 years	0	0	0	1
1863	F	33	2016-06-16 12:00:33	MN	26.4	49	136.76	2.0（2+）（mg/L）	2.0（2+）	6.32	3.14	111	69	0	0	0	0	0	1
1864	M	42	2016-05-26 11:51:35	MPGN	19.1	92	84.92	1.0（1+）（mg/L）	1.0（2+）	6.25	6.42	165	98	1 year	0	0	0	0	1
1865	F	30	2016-05-26 11:51:02	LN	23.1	125	46.48	10（3+）（mg/L）	3.0（3+）	5.4	0.86	135	91	0	0	0	0	Ⅲ	0
1866	M	59	2016-05-23 11:53:53	MN	31	55	88.63	1.0（1+）（mg/L）	2.0（2+）	7.81	3	141	81	0	2 weeks	0	0	0	0
1867	F	44	2016-05-23 11:53:42	MN	27.5	55	95.92	10（3+）（mg/L）	3.0（3+）	70.81	2.83	113	78	0	First found	0	0	0	1
1868	F	67	2016-05-19 12:01:10	Crescentic glomerulonephritis	34.8	669	17.4	10（3+）（mg/L）	1.0（2+）	480.58	3.05	158	99	2 years	5 years	1	1	Ⅲ	0
1869	M	36	2016-05-19 12:01:01	IgA	30.2	165	39.4	10（3+）（mg/L）	0.7（1+）	375.62	3.45	129	76	First found	0	0	1	0	1
1870	F	30	2016-05-16 11:34:52	LN	32.4	34	119.39	1.0（1+）（mg/L）	0.7（1+）	8.37	3.05	106	69	0	0	1	0	0	0
1871	F	61	2016-05-12 12:08:01	IgA	38.5	67	82.32	10（3+）（mg/L）	0.7（1+）	104.24	3.22	147	70	1 year	First found	0	0	0	1
1872	F	60	2016-05-12 11:53:00	MN	26.7	92	50.82	2.0（2+）（mg/L）	3.0（3+）	10.94	7.28	119	78	5 years	0	0	0	Ⅲ	1
1873	M	56	2016-05-12 11:42:54	MN	19.7	53	103.13	2.0（2+）（mg/L）	2.0（2+）	2.34	3.51	123	72	0	0	0	0	0	1
1874	F	65	2016-05-12 11:42:46	LN	29.7	103	50.49	10（3+）（mg/L）	1.0（2+）	13.61	2.33	140	75	First found	0	0	1	0	0
1875	F	44	2016-05-09 12:07:52	IgA	40.7	57	165.7	10（3+）（mg/L）	0.7（1+）	20.34	0.34	120	65	0	0	0	0	0	0
1876	F	46	2016-05-05 12:03:55	IgA	37.5	53	104.43	10（3+）（mg/L）	2.0（2+）	24.52	3.05	124	68	2 years	0	0	0	0	0
1877	M	22	2016-05-05 12:03:48	MCD	17.1	56	132.5	0.3（+-）（mg/L）	2.0（2+）	2.81	2.99	107	64	0	0	0	0	0	1
1878	M	30	2016-05-05 12:03:40	MN	32.5	64	82.32	-	2.0（2+）	1.19	3.29	144	89	1 year	0	0	0	0	1
1879	M	72	2016-04-28 12:10:07	MN	24	112	58.55	0.6（1+）（mg/L）	2.0（2+）	6.43	3.24	130	75	1 year	0	0	0	0	1
1880	F	43	2016-04-25 12:01:38	IgA	38.6	154	40.69	0.6（1+）（mg/L）	0.5（1+）	18.68	0.33	129	88	2 months	0	0	0	Ⅲ	0
1881	F	20	2016-04-25 12:01:19	LN	13.7	63	92.66	1.0（1+）（mg/L）	6.0（3+）	1.69	1.99	108	66	0	0	0	0	0	0
1882	M	53	2016-04-21 11:44:22	MN	27.3	83	79.87	0.6（1+）（mg/L）	2.0（2+）	3.6	2.95	117	94	3 years	3 months	0	0	Ⅱ	1
1883	F	64	2016-04-21 11:44:14	MN	21.4	61	82.32	2.0（2+）（mg/L）	6.0（3+）	17.44	1.43	153	87	half a year	0	0	0	0	1
1884	F	58	2016-04-18 12:20:05	FSGS	18.7	509	33.04	0.6（1+）（mg/L）	3.0（3+）	22.09	7.87	140	75	6 years	0	1	1	0	1
1885	M	23	2016-04-18 12:19:55	MCD	21.6	98	85.82	-	3.0（3+）	0.59	7.33	117	74	0	0	0	0	0	1
1886	F	45	2016-04-11 15:10:56	MsPGN	35.9	111	68.24	2.0（2+）（mg/L）	1.0（2+）	3.33	1.2	157	104	3 years	0	0	0	Ⅱ	0
1887	M	66	2016-04-11 12:31:11	HBVN	26.1	69	92.66	2.0（2+）（mg/L）	6.0（3+）	13.72	8.49	154	79	0	0	0	0	0	1
1888	F	24	2016-04-11 11:54:47	IgA	35.3	95	69.44	10（3+）（mg/L）	1.0（2+）	89.1	1.59	135	84	0	0	0	0	Ⅱ	0
1889	M	67	2016-04-11 11:54:38	TIN	24.6	257	34.77	1.0（1+）（mg/L）	3.0（3+）	4.16	7	135	80	0	0	0	0	Ⅳ	1
1890	M	64	2016-04-07 12:09:31	multiple myeloma related nephropathy	32.9	133	55.21	2.0（2+）（mg/L）	0.7（1+）	10.53	1.92	119	56	2 months	0	0	0	Ⅲ	0
1891	F	82	2016-04-07 12:09:22	MCD	18.7	209	26.88	1.0（1+）（mg/L）	3.0（3+）	1.48	0.66	138	98	0	0	0	1	0	1
1892	F	60	2016-04-07 12:09:14	MN	30.1	67	63.3	-	0.7（1+）	4.79	3.83	155	90	0	0	0	0	0	1
1893	M	15	2016-04-07 12:09:01	Alport syndrome	40.6	81	104.43	5.0（2+）（mg/L）	0.7（1+）	27.99	0.77	103	59	3 years	0	0	0	0	0
1894	M	30	2016-03-31 11:53:34	MCD	14.2	44	107.13	0.6（1+）（mg/L）	3.0（3+）	3.24	5.06	136	99	0	0	0	0	0	1
1895	M	32	2016-03-31 11:53:25	HBVN	16.5	161	46.48	2.0（2+）（mg/L）	3.0（3+）	5	14.08	112	80	0	0	0	0	Ⅲ	1
1896	F	31	2016-03-28 12:23:38	Alport syndrome	42.2	50	159.61	-	0.1（+-）	5.02	0.27	123	82	0	0	0	0	0	0
1897	F	35	2016-03-28 12:23:29	IgA	42.4	63	112.94	0.3（+-）（mg/L）	0.5（1+）	4.18	0.32	93	67	0	0	0	0	0	0
1898	M	57	2016-03-28 12:23:16	DN	27.1	145	41.37	0.3（+-）（mg/L）	1.0（2+）	2.18	7.24	186	105	2 months	10 years	0	0	Ⅲ	1
1899	F	26	2016-03-28 12:23:01	IgA	41.8	45	162.6	10（3+）（mg/L）	-	15.2	3.05	124	76	0	0	0	0	0	0
1900	M	38	2016-03-24 11:37:04	IgA	44.2	147	109.96	-	0.7（1+）	0.58	3.09	135	82	4 years	0	0	0	Ⅱ	0
1901	M	77	2016-03-21 11:51:56	HBVN	21.7	60.4	42.3	0.3（+-）（mg/L）	0.7（1+）	6.7	3.17	139	78	2 years	0	0	0	0	1
1902	F	59	2016-03-17 11:40:53	MCD	18.6	95	48.87	2.0（2+）（mg/L）	3.0（3+）	11.45	5.3	121	75	0	0	0	1	0	1
1903	F	50	2016-03-14 12:02:29	DN	19.3	86	64.87	1.0（1+）（mg/L）	2.0（2+）	4.81	7.48	210	100	2 months	20 years	0	0	Ⅱ	1
1904	M	24	2016-03-10 12:42:42	LN	17.2	94	53.3	10（3+）（mg/L）	3.0（3+）	207.5	8.14	145	95	First found	0	0	0	0	1
1905	M	47	2016-03-10 12:42:17	MN	19.5	85	94.81	-	5.0（3+）	2	13.39	149	103	1 month	1 month	0	0	0	1
1906	M	37	2016-03-08 12:00:44	Hypertensive Renal Disease	33.8	214	56.01	1.0（1+）（mg/L）	0.7（1+）	1.85	1.87	192	118	First found	0	0	1	0	0
1907	M	69	2016-03-07 12:02:25	DN	41.4	94.9	86.74	0.3（+-）（mg/L）	0.7（1+）	7.29	1.42	129	84	17 years	1 year	1	0	0	0
1908	M	20	2016-03-07 12:02:12	MN	20.1	126	41.14	5.0（2+）（mg/L）	6.0（3+）	94.66	13.06	113	72	0	0	0	1	0	1
1909	F	40	2016-03-03 12:13:23	MN	22.2	51	143.65	0.6（1+）（mg/L）	1.0（2+）	1.78	2.98	146	98	0	0	0	0	0	1
1910	M	63	2016-03-03 12:13:10	MN	22.1	55	91.62	-	2.0（2+）	2.34	1.39	129	75	0	0	0	0	0	1
1911	M	31	2016-02-29 12:12:12	Crescentic glomerulonephritis	33.3	641	20.89	5.0（2+）（mg/L）	2.0（2+）	14.94	3.05	156	90	First found	0	1	1	0	0
1912	F	30	2016-02-29 12:11:56	IgA	39.9	94	64.87	2.0（2+）（mg/L）	3.0（3+）	21.4	3.92	125	90	0	0	0	0	Ⅱ	0
1913	F	27	2016-02-29 12:11:45	IgA	29	421	27.61	10（3+）（mg/L）	3.0（3+）	148.07	4.09	200	130	2 years	0	0	0	Ⅳ	0
1914	F	15	2016-02-22 12:16:30	LN	32.3	363	30.67	10（3+）（mg/L）	2.0（2+）	293.22	2.28	218	140	First found	0	0	0	Ⅳ	0
1915	F	42	2016-02-22 12:16:06	LN	20.1	208	23.97	1.0（1+）（mg/L）	3.0（3+）	16.51	14.96	150	102	First found	0	0	1	0	1
1916	F	81	2016-02-22 12:15:57	ANCA-associated glomerulonephritis	26.8	578	18	10（3+）（mg/L）	0.3（1+）	131.71	0.14	187	93	First found	0	0	1	0	0
1917	M	77	2016-02-22 12:15:50	MN	15.9	119	48.56	2.0（2+）（mg/L）	6.0（3+）	13.28	17.04	170	102	2 months	0	0	0	Ⅲ	1
1918	F	65	2016-02-22 12:15:41	HSPN	34.1	66	62.29	5.0（2+）（mg/L）	1.0（2+）	59.6	1.12	145	100	First found	0	0	0	0	0
1919	M	62	2016-02-22 12:15:31	MsPGN	15.7	133	45.92	2.0（2+）（mg/L）	3.0（3+）	21.38	3.05	110	75	0	10 years	0	0	Ⅲ	1
1920	M	47	2016-02-18 12:11:38	FSGS	23.3	137	42.79	0.3（+-）（mg/L）	2.0（2+）	5.74	5.55	150	90	First found	6 years	0	0	Ⅲ	0
1921	M	61	2016-02-18 12:11:30	HBVN	16.8	83	66.51	0.6（1+）（mg/L）	2.0（2+）	7.58	2.56	157	88	1 month	0	0	0	0	1
1922	M	61	2016-02-15 12:07:14	MCD	39.1	120	79.08	1.0（1+）（mg/L）	3.0（3+）	32.08	3	150	95	10 years	1 and a half years	0	0	0	0
1923	M	19	2016-02-01 11:28:40	MCD	16.8	130.8	55.5046	1.0（1+）（mg/L）	6.0（3+）	6.68	8.91	104	91	0	0	0	0	Ⅱ	1
1924	F	64	2016-01-28 11:04:21	MCD	26.1	65	91.62	0.3（+-）（mg/L）	-	0.23	3.05	150	99	First found	0	0	0	0	1
1925	M	61	2016-01-25 13:45:07	DN	32.4	127	99.4	2.0（2+）（mg/L）	2.0（2+）	10.35	3.82	148	60	0	First found	0	0	Ⅰ	1
1926	M	70	2016-01-25 13:44:56	MN	34.3	40	134.59	1.0（1+）（mg/L）	1.0（2+）	3.29	1.17	99	64	1 year	2 years	0	0	0	1
1927	F	38	2016-01-25 13:44:46	MN	30.2	216	45.64	10（3+）（mg/L）	1.0（2+）	117.54	2.79	140	76	0	0	0	1	0	0
1928	M	57	2016-01-25 13:44:35	IgA	34.5	127	58.99	5.0（2+）（mg/L）	1.0（2+）	36.18	3.19	140	75	7 years	0	0	0	Ⅲ	0
1929	F	53	2016-01-25 12:00:03	MN	30.8	29.7097	175.7	2.0（2+）（mg/L）	1.0（2+）	39.04	1.95	140	80	10 years	10 years	0	0	0	0
1930	M	52	2016-01-25 11:33:18	Alport syndrome	41	101	95.92	1.0（1+）（mg/L）	0.5（1+）	11.03	1.02	127	87	half a year	0	0	0	0	0
1931	F	72	2016-01-22 11:35:20	MN	21.9	62	82.32	2.0（2+）（mg/L）	1.0（2+）	9.88	8.4	145	94	First found	0	0	0	0	1
1932	M	50	2016-01-21 10:56:22	IgA	30.9	420	21.02	0.6（1+）（mg/L）	0.7（1+）	6.55	8.99	176	102	First found	0	0	0	Ⅲ	1
1933	M	31	2016-01-21 10:56:11	IgA	38.8	102	141.28	0.6（1+）（mg/L）	0.15（+-）	2	0.42	149	73	0	0	0	0	0	0
1934	M	67	2016-01-18 11:42:59	MN	21.9	75	70.05	2.0（2+）（mg/L）	2.0（2+）	2.07	6.72	165	96	7 years	0	0	0	0	1
1935	M	29	2016-01-14 11:55:49	MCD	21.6	104	88.63	-	2.0（2+）	1.96	6.93	120	75	0	0	0	0	0	1
1936	M	49	2016-01-14 11:55:33	DN	24.9	98	78.31	0.6（1+）（mg/L）	3.0（3+）	17.05	4.36	170	80	3 months	8 years	0	0	Ⅱ	1
1937	M	38	2016-01-11 11:42:42	MN	22.9	106	88.63	0.3（+-）（mg/L）	0.7（1+）	5.76	6.38	121	75	0	0	0	1	0	1
1938	F	29	2016-01-04 12:40:19	IgA	41.6	253	33.34	10（3+）（mg/L）	0.3（1+）	56.02	3.05	124	68	0	0	0	0	Ⅳ	0
1939	M	15	2016-01-04 12:40:09	MCD	48.3	60	130.46	-	-	0.25	0.66	130	80	4 months	0	0	0	0	0
1940	F	51	2016-01-04 12:39:56	MN	19.8	56	97.05	0.3（+-）（mg/L）	2.0（2+）	10.03	1.57	105	57	0	0	0	0	0	1
1941	M	23	2016-01-04 12:39:45	MN	25.7	80	78.31	0.3（+-）（mg/L）	1.0（2+）	3.24	10.57	132	91	0	0	0	0	0	0
1942	M	24	2016-01-04 12:38:59	IgA	35.7	115	85.82	10（3+）（mg/L）	1.0（2+）	30.82	1.57	128	75	0	0	0	0	Ⅱ	0
1943	F	69	2015-12-30 11:21:25	MPGN	27.5	159	33.04	-	0.7（1+）	1.62	2.72	175	80	8 years	0	0	0	Ⅲ	1
1944	F	27	2015-12-24 11:46:50	IgA	31.2	45	107.13	10（3+）（mg/L）	3.0（3+）	793.71	1.04	131	76	0	0	0	0	0	0
1945	F	33	2015-12-21 11:59:50	IgA	38	55	116.727	10（3+）（mg/L）	2.0（2+）	399.67	1.13	130	80	0	0	0	0	0	0
1946	F	53	2015-12-21 11:59:38	MN	25.3	58	109.96	2.0（2+）（mg/L）	2.0（2+）	7.54	3.54	113	68	0	0	0	0	0	1
1947	M	58	2015-12-17 12:38:49	IgA	41.1	55	89.61	10（3+）（mg/L）	0.3（1+）	194.09	1.01	135	75	0	0	0	0	0	0
1948	M	25	2015-12-15 12:03:12	HSPN	42.5	77	101.86	5.0（2+）（mg/L）	0.7（1+）	25.13	1.02	130	85	First found	0	0	0	0	0
1949	F	53	2015-12-14 11:46:42	LN	19.8	73	46.48	5.0（2+）（mg/L）	3.0（3+）	15.89	11.19	153	80	4 years	0	0	0	Ⅲ	1
1950	M	19	2015-12-07 11:41:54	LN	39.9	1084	13.76	0.6（1+）（mg/L）	1.0（2+）	0.47	3.05	138	88	7 years	0	0	0	Ⅴ	0
1951	F	30	2015-12-03 11:31:28	MN	28.7	50	104.43	2.0（2+）（mg/L）	6.0（3+）	11.65	4.97	106	73	0	0	0	0	0	1
1952	M	49	2015-12-03 11:31:18	DN	34.4	128	57.25	1.0（1+）（mg/L）	6.0（3+）	20	5.97	148	82	4 months	4 months	0	0	Ⅱ	0
1953	F	39	2015-11-17 15:42:10	LN	19.1	105	43.28	2.0（2+）（mg/L）	2.0（2+）	12.02	5.67	150	98	First found	0	0	0	Ⅲ	1
1954	F	49	2015-11-12 11:05:47	IgA	36.2	74	68.24	10（3+）（mg/L）	0.3（1+）	29.5	0.58	133	72	2 weeks	0	0	0	0	0
1955	M	34	2015-11-10	Lipoprotein nephropathy	26.3	74	108.53	5.0（2+）（mg/L）	3.0（3+）	13.32	4.78	162	113	First found	0	0	0	0	1
1956	M	52	2015-11-09 12:18:12	MCD	19.7	86	95.92	0.6（1+）（mg/L）	3.0（3+）	1756.49	2.32	136	75	0	0	0	0	0	1
1957	M	42	2015-11-05 12:27:15	MsPGN	42	133	76.08	-	0.5（1+）	1.44	0.39	144	86	2 years	0	0	0	Ⅱ	0
1958	M	28	2015-11-02 11:43:37	LN	17.9	605	10.52	5.0（2+）（mg/L）	3.0（3+）	278.51	0.57	135	78	0	0	0	1	0	0
1959	M	43	2015-10-29 12:12:14	MCD	14.7	71	108.53	5.0（2+）（mg/L）	6.0（3+）	1.93	2.9	113	77	0	0	0	0	0	1
1960	M	52	2015-10-29 12:12:06	MCD	16.7	139	50.49	1.0（1+）（mg/L）	6.0（3+）	1.31	0.68	117	67	0	0	0	1	0	1
1961	F	26	2015-10-29 12:11:57	LN	24.4	82	40.69	10（3+）（mg/L）	2.0（2+）	143.5	4.4	122	81	0	0	0	0	0	0
1962	M	67	2015-10-28	MPGN	21.5	87	67.08	2.0（2+）（mg/L）	2.0（2+）	13.18	7.97	200	130	5 years	0	0	0	Ⅱ	1
1963	M	22	2015-10-22 12:08:52	MCD	17.3	76	87.67	0.6（1+）（mg/L）	3.0（3+）	1.01	3.05	131	88	0	0	0	0	0	1
1964	M	33	2015-10-22 12:08:27	MN	21.8	261	34.12	1.0（1+）（mg/L）	6.0（3+）	2.7	0.92	180	100	1 year	0	0	0	Ⅲ	1
1965	M	74	2015-10-19 11:34:17	MPGN	18.8	130	20.77	5.0（2+）（mg/L）	3.0（3+）	28.51	0.88	138	76	2 years	0	0	0	Ⅳ	1
1966	M	59	2015-10-15 12:05:06	TIN	27.3	464	22.88	-	0.2（+-）	0.52	0.63	117	63	0	0	0	1	0	0
1967	F	71	2015-10-12 12:16:04	Familial recurrent hematuria syndrome	23.3	88	66.51	-	2.0（2+）	0.94	0.89	107	68	0	0	0	0	0	1
1968	M	43	2015-10-12 12:15:56	IgA	30.3	120	59.9	10（3+）（mg/L）	3.0（3+）	50.51	4.79	118	92	1 month	1 month	0	1	0	1
1969	F	66	2015-10-08 11:57:02	LN	23.3	64	46.48	-	-	0.56	0.62	96	62	0	0	0	0	0	1
1970	M	45	2015-10-08 11:56:20	IgA	43	90	88.63	10（3+）（mg/L）	0.7（1+）	9.29	0.59	135	85	1 year	0	0	0	0	0
1971	M	63	2015-09-29 11:46:01	MCD	15.7	63.2	87.67	1.0（1+）（mg/L）	3.0（3+）	1.03	3.05	104	68	0	First found	0	0	0	1
1972	F	51	2015-09-28 11:31:48	MN	23.3	65	84.03	2.0（2+）（mg/L）	1.0（2+）	14.13	6.78	122	80	First found	0	0	0	0	1
1973	M	44	2015-09-24 11:35:38	HBVN	25.5	64	94.81	10（3+）（mg/L）	3.0（3+）	7.78	22.52	130	72	1 year	0	0	0	0	1
1974	M	63	2015-09-24 11:35:28	MN	29.7	55	79.08	-	0.2（+-）	2.34	3.05	130	80	0	0	0	0	0	1
1975	M	66	2015-09-21 11:16:18	HBVN	25.7	78	86.74	5.0（2+）（mg/L）	0.7（1+）	32.06	1.88	117	61	0	0	0	0	0	1
1976	M	44	2015-09-17 10:57:23	Metabolically associated nephropathy	36.3	114.5	66.51	0.3（+-）（mg/L）	0.7（1+）	2	1.22	130	80	1 year	0	0	0	Ⅱ	0
1977	F	42	2015-09-14 15:24:23	HBVN	22.9	70	84	2.0（2+）（mg/L）	5.0（3+）	5	4.54	131	84	0	0	0	0	0	1
1978	M	50	2015-09-14 15:24:10	HBVN	28.3	71.6561	75.36	0.6（1+）（mg/L）	3.0（3+）	29.41	4.09	115	80	0	0	0	0	0	1
1979	M	26	2015-09-14 15:24:00	IgA	43.4	83.8955	81.53	10（3+）（mg/L）	1.0（2+）	5	0.72	131	93	0	0	0	0	0	0
1980	F	33	2015-09-10 11:18:23	LN	32.2	51	91.62	-	0.1（+-）	2.16	0.42	120	75	0	0	0	0	0	0
1981	F	55	2015-09-07 12:22:53	LN	43.7	49.8	69.44	-	0.1（+-）	2.3	0.57	135	84	10 years	0	0	0	Ⅱ	1
1982	M	52	2015-09-02 11:20:08	HBVN	16.1	91	76.81	2.0（2+）（mg/L）	0.7（1+）	45.02	1.52	124	88	0	0	0	0	0	1
1983	M	70	2015-08-24 12:09:53	MN	22	112	47.35	1.0（1+）（mg/L）	2.0（2+）	3.04	7.05	142	83	10 years	half a year	0	1	0	1
1984	M	60	2015-08-24 12:09:41	IgA	17.3	98	54.43	0.6（1+）（mg/L）	3.0（3+）	2	11.62	140	83	The course of disease is unknown	0	0	1	0	1
1985	F	41	2015-08-20 12:10:32	IgA	28.6	61.1	116.08	5.0（2+）（mg/L）	1.0（2+）	25.34	1.95	133	89	0	0	0	0	0	0
1986	M	42	2015-08-17	HBVN	28.4	60	132.5	2.0（2+）（mg/L）	3.0（3+）	67.48	2.41	114	58	0	0	0	0	0	0
1987	M	62	2015-08-17 11:16:22	DN	27.8	129	39.82	-	1.0（2+）	1.73	2.97	132	62	0	10 years	0	0	Ⅲ	0
1988	M	27	2015-08-13 11:33:35	DN	29.1	201	56.83	0.6（1+）（mg/L）	3.0（3+）	5.99	4.61	170	112	0	14 years	0	0	Ⅲ	1
1989	F	62	2015-08-10 11:49:18	DN	30.1	311	22.8	0.6（1+）（mg/L）	6.0（3+）	1.58	6.68	130	70	7 years	14 years	0	0	Ⅳ	1
1990	M	17	2015-08-10 11:49:10	MCD	14	62.1	87.67	0.3（+-）（mg/L）	6.0（3+）	0.5	1.24	118	75	0	0	0	0	0	1
1991	F	49	2015-08-10 11:49:03	MCD	34.9	47	95.92	1.0（1+）（mg/L）	-	8.3	0.15	107	71	0	0	0	0	0	0
1992	F	25	2015-08-10 11:48:54	FSGS	40.7	63	112.94	10（3+）（mg/L）	1.0（2+）	21.06	1.77	130	75	0	0	0	0	0	0
1993	M	42	2015-08-06 11:35:39	MsPGN	22.5	72	70.68	2.0（2+）（mg/L）	6.0（3+）	2.09	3.05	150	90	First found	0	1	0	0	1
1994	F	35	2015-08-06 11:35:29	IgA	35.6	65	87.67	5.0（2+）（mg/L）	0.7（1+）	14.44	2	130	76	0	0	0	0	0	0
1995	M	35	2015-08-06 11:35:08	IgA	40.3	98	71.31	0.3（+-）（mg/L）	0.1（+-）	3.11	1.24	124	89	5 years	0	0	0	Ⅱ	0
1996	F	26	2015-08-06 11:34:58	IgA	42.3	59	122.87	10（3+）（mg/L）	0.1（+-）	363.13	3.05	116	76	0	0	0	0	0	0
1997	F	15	2015-08-03 12:13:55	LN	26.7	102	41.83	10（3+）（mg/L）	1.0（2+）	95.96	3.05	119	70	0	0	0	0	Ⅲ	0
1998	M	28	2015-07-30 11:53:59	IgA	44.1	83	89.61	2.0（2+）（mg/L）	-	20.9	0.1	136	113	0	0	0	0	0	0
1999	F	36	2015-07-28	IgA	43.2	53	103.13	2.0（2+）（mg/L）	-	4.23	0.18	135	87	2 years	0	0	0	0	0
[truncated: 833 more rows]
